# Supplementary material for: Turning Escherichia coli into a Frataxin-Dependent Organism
Source: PubMed Central journal article supplement (PMC4440780; doi:10.1371/journal.pgen.1005134), 2015-05-21

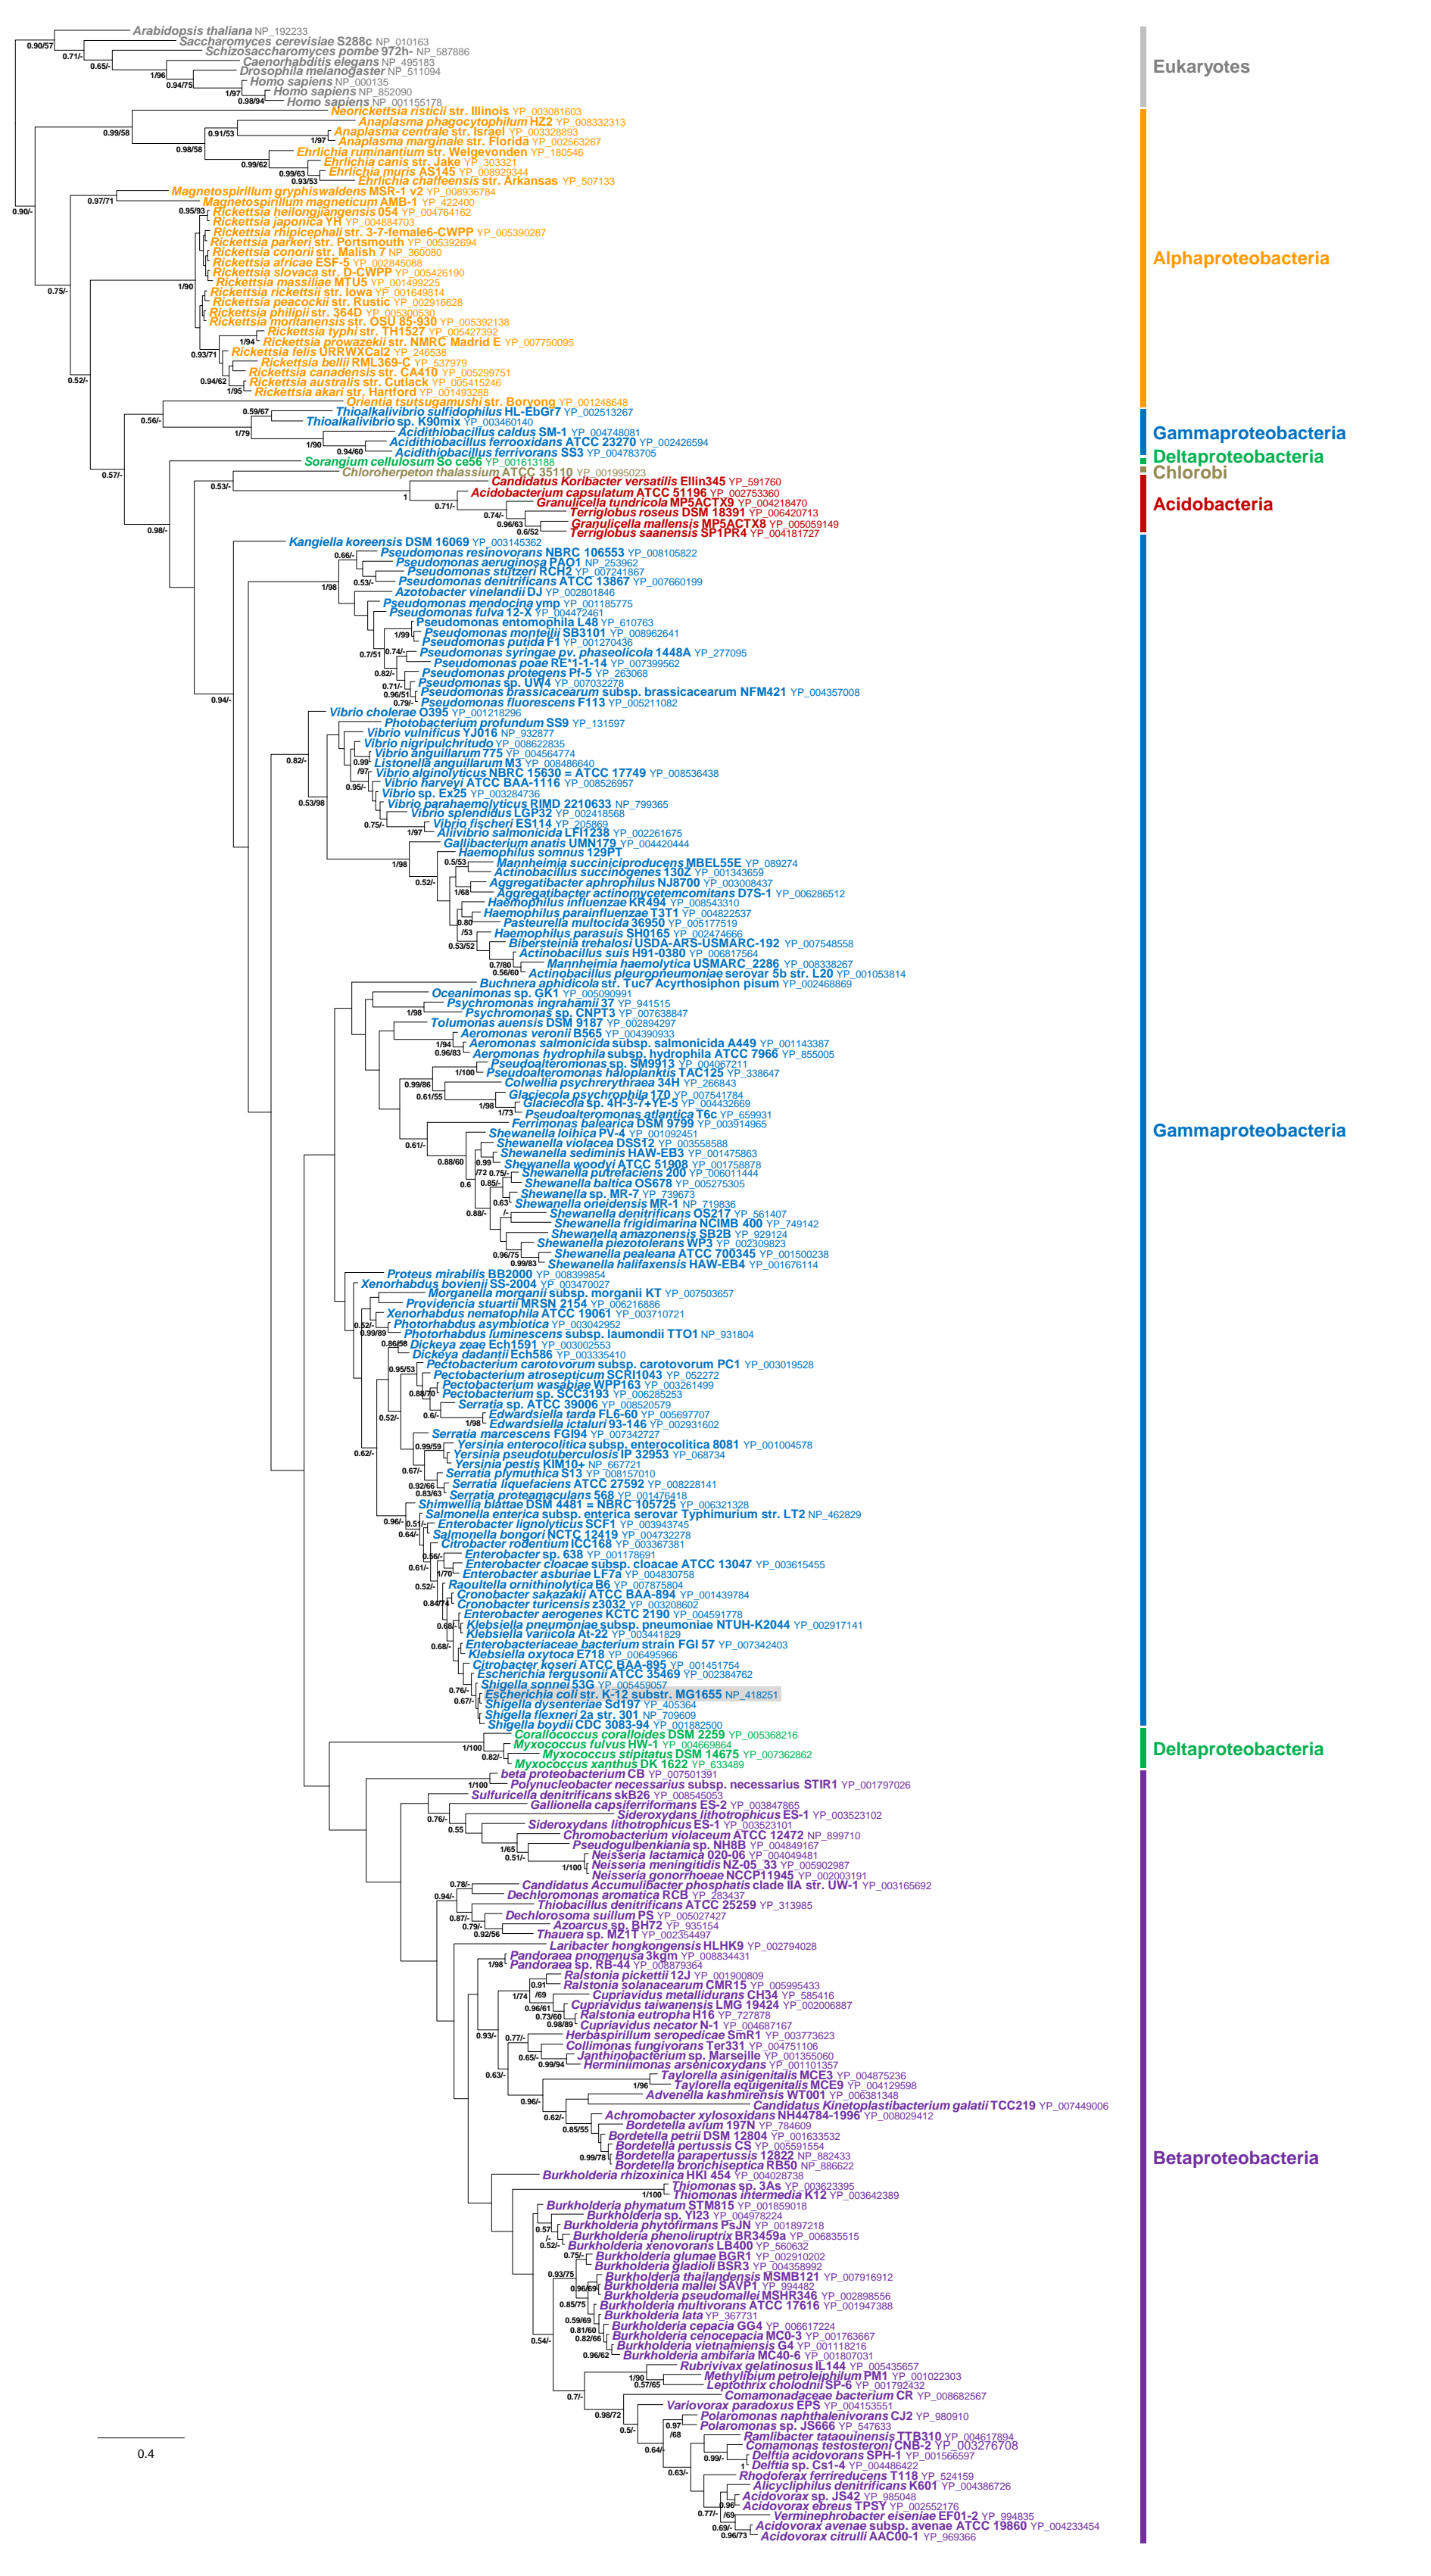

Supplement: pgen.1005134.s005.pdf [file pgen.1005134.s005.pdf]
