# Supplementary material for: Turning Escherichia coli into a Frataxin-Dependent Organism
Source: PubMed Central journal article supplement (PMC4440780; doi:10.1371/journal.pgen.1005134), 2015-05-21
Supplement: pgen.1005134.s006.pdf [file pgen.1005134.s006.pdf]

1

|                                      |       |       |       |         |           |
|--------------------------------------|-------|-------|-------|---------|-----------|
| 243233_Mcapsulatus@YP_112782         | ----- | ----- | ----- | -----   | -----     |
| 458817_Shalifaxensis@YP_001673798    | ----- | ----- | ----- | -----   | -----     |
| 398579_Spealeana@YP_001501349        | ----- | ----- | ----- | -----   | -----     |
| 557598_Lhongkongensis@YP_002796852   | ----- | ----- | ----- | -----   | -----     |
| 521006_Ngonorrhoeae@YP_002001906     | ----- | ----- | ----- | -----   | -----     |
| 489653_Nlactamica@YP_004048810       | ----- | ----- | ----- | -----   | -----     |
| 935589_Nmeningitidis@YP_005903962    | ----- | ----- | ----- | -----   | -----     |
| 395495_Lcholodnii@YP_001790394       | ----- | ----- | ----- | -----   | -----     |
| 999541_Bgladioli@YP_004361365        | ----- | ----- | ----- | -----   | -----     |
| 983917_Rgelatinosus@YP_005439140     | ----- | ----- | ----- | -----   | -----     |
| 1416914_Ppomenusa@YP_008837319       | ----- | ----- | ----- | -----   | -----     |
| 1380774_Psp@YP_008881415             | ----- | ----- | ----- | -----   | -----     |
| 1249661_Bthailandensis@YP_007917844  | ----- | ----- | ----- | -----   | -----     |
| 320388_Bmallei@YP_993528             | ----- | ----- | ----- | -----   | -----     |
| 536230_Bpseudomallei@YP_002897469    | ----- | ----- | ----- | -----   | -----     |
| 395019_Bmultivorans@YP_001579332     | ----- | ----- | ----- | -----   | -----     |
| 626418_Bglumae@YP_002912250          | ----- | ----- | ----- | -----   | -----     |
| 365044_Pnaphthalenivor@YP_981803     | ----- | ----- | ----- | -----   | -----     |
| 266265_Bxenovorans@YP_553871         | ----- | ----- | ----- | -----   | -----     |
| 269482_Bvietnamiensis@YP_001115172   | ----- | ----- | ----- | -----   | -----     |
| 583345_Mmobilis@YP_003049105         | ----- | ----- | ----- | -----   | -----     |
| 666681_Mversatilis@YP_003674921      | ----- | ----- | ----- | -----   | -----     |
| 391038_Bphymatum@YP_001857685        | ----- | ----- | ----- | -----   | -----     |
| 398577_Bambifaria@YP_001808732       | ----- | ----- | ----- | -----   | -----     |
| 269482_Bvietnamiensis@YP_001120041   | ----- | ----- | ----- | -----   | -----     |
| 406425_Bcenocepacia@YP_001765425     | ----- | ----- | ----- | -----   | -----     |
| 1009846_Bcepacia@YP_006615433        | ----- | ----- | ----- | -----   | -----     |
| 482957_Blata@YP_369669               | ----- | ----- | ----- | -----   | -----     |
| 748280_Psp@YP_004848592              | ----- | ----- | ----- | -----   | -----     |
| 1229205_Bphenoliruptrix@YP_006834626 | ----- | ----- | ----- | -----   | M         |
| 1163617_Sdenitrificans@YP_008546117  | ----- | ----- | ----- | -----   | -----     |
| 266265_Bxenovorans@YP_559453         | ----- | ----- | ----- | -----   | -----     |
| 398527_Bphytofirmans@YP_001896197    | ----- | ----- | ----- | -----   | -----     |
| 375286_Jsp@YP_001352943              | ----- | ----- | ----- | -----   | -----     |
| 204773_Harsenicoxydans@YP_001100494  | ----- | ----- | ----- | -----   | -----     |
| 580332_Slithotrophicus@YP_003524869  | ----- | ----- | ----- | -----   | -----     |
| 159087_Daromatica@YP_285167          | ----- | ----- | ----- | -----   | -----     |
| 882378_Brhizoxinica@YP_004029636     | ----- | ----- | ----- | -----   | -----     |
| 85643_Tsp@YP_002355840               | ----- | ----- | ----- | -----   | -----     |
| 757424_Hseropedicae@YP_003776230     | ----- | ----- | ----- | -----   | -----     |
| 522306_Caccumulibacter@YP_003167247  | ----- | ----- | ----- | -----   | -----     |
| 76114_Aaromaticum@YP_160687          | ----- | ----- | ----- | -----   | -----     |
| 381666_Reutropha@YP_725668           | ----- | ----- | ----- | -----   | -----     |
| 977880_Ctaiwanensis@YP_002005171     | ----- | ----- | ----- | -----   | -----     |
| 1042878_Cnecator@YP_004684939        | ----- | ----- | ----- | -----   | -----     |
| 266264_Cmetallidurans@YP_583181      | ----- | ----- | ----- | -----   | -----     |
| 395494_Gcapsiferriiform@YP_003846450 | ----- | ----- | ----- | -----   | -----     |
| 859655_Rsolanacearum@YP_005996961    | ----- | ----- | ----- | -----   | -----     |
| 402626_Rpickettii@YP_001898467       | ----- | ----- | ----- | -----   | -----     |
| 543913_bproteobacteriu@YP_007502653  | ----- | ----- | ----- | -----   | -----     |
| 62928_Asp@YP_933519                  | ----- | ----- | ----- | -----   | -----     |
| 640081_Dsuillum@YP_005028573         | ----- | ----- | ----- | -----   | -----     |
| 452638_Pnecessarius@YP_001797351     | ----- | ----- | ----- | -----   | -----     |
| 292415_Tdenitrificans@YP_314923      | ----- | ----- | ----- | -----   | -----     |
| 265072_Mflagellatus@YP_544916        | ----- | ----- | ----- | -----   | -----     |
| 582744_Mglucosetrophus@YP_003051619  | ----- | ----- | ----- | -----   | -----     |
| 887061_Msp@YP_004040241              | ----- | ----- | ----- | -----   | -----     |
| 891398_CTremblaya@YP_004707015       | ----- | ----- | ----- | -----   | -----     |
| 426114_Tarsenitoxydans@YP_003623866  | ----- | ----- | ----- | MDV\$FA | ASGRFFEDK |
| 75379_Tintermedia@YP_003642782       | ----- | ----- | ----- | -----   | -----     |
| 937774_Tequigenitalis@YP_004130301   | ----- | ----- | ----- | -----   | -----     |
| 1008459_Tasinigenitalis@YP_004874474 | ----- | ----- | ----- | -----   | -----     |
| 634503_Eictaluri@YP_002934567        | ----- | ----- | ----- | -----   | -----     |
| 718251_Etardea@YP_005700147          | ----- | ----- | ----- | -----   | -----     |
| 259536_Parcticus@YP_264760           | ----- | ----- | ----- | -----   | -----     |
| 335284_Pcryohalolentis@YP_580918     | ----- | ----- | ----- | -----   | -----     |
| 571800_Psp@YP_008163576              | ----- | ----- | ----- | -----   | -----     |
| 420662_Mpetroleiphilum@YP_001021452  | ----- | ----- | ----- | -----   | -----     |
| 243365_Cviolaceum@NP_900763          | ----- | ----- | ----- | -----   | -----     |
| 1208919_CKinetoplastiba@YP_007459239 | ----- | ----- | ----- | -----   | -----     |
| 983545_Gsp@YP_004435367              | ----- | ----- | ----- | -----   | -----     |
| 342610_Patlantica@YP_660819          | ----- | ----- | ----- | -----   | -----     |
| 743299_Aferrivorans@YP_004783591     | ----- | ----- | ----- | -----   | -----     |
| 243159_Aferrooxidans@YP_002425162    | ----- | ----- | ----- | -----   | -----     |
| 1005048_Cfungivorans@YP_004753777    | ----- | ----- | ----- | -----   | -----     |
| 669502_CProffftella@YP_008343646     | ----- | ----- | ----- | -----   | -----     |
| 757424_Hseropedicae@YP_003776535     | ----- | ----- | ----- | -----   | -----     |
| 395495_Lcholodnii@YP_001790080       | ----- | ----- | ----- | -----   | -----     |
| 257310_Bbronchiseptica@NP_888820     | ----- | ----- | ----- | -----   | -----     |
| 990288_Acaldus@YP_004748177          | ----- | ----- | ----- | -----   | -----     |
| 990288_Acaldus@YP_004748110          | ----- | ----- | ----- | -----   | -----     |
| 983917_Rgelatinosus@YP_005436383     | ----- | ----- | ----- | -----   | -----     |
| 360910_Bavium@YP_786035              | ----- | ----- | ----- | -----   | -----     |
| 1036672_Akashmirensis@YP_006379415   | ----- | ----- | ----- | -----   | -----     |

|                                      |      |      |      |      |      |
|--------------------------------------|------|------|------|------|------|
| 340100_Bpetrii@YP_001631386          | ---- | ---- | ---- | ---- | ---- |
| 523791_Kkoreensis@YP_003146685       | ---- | ---- | ---- | ---- | ---- |
| 156889_Mmarinus@YP_866958            | ---- | ---- | ---- | ---- | ---- |
| 404589_Asp@YP_001377835              | ---- | ---- | ---- | ---- | ---- |
| 290397_Adehalogenans@YP_463806       | ---- | ---- | ---- | ---- | ---- |
| 447217_Asp@YP_002132996              | ---- | ---- | ---- | ---- | ---- |
| 455488_Adehalogenans@YP_002491042    | ---- | ---- | ---- | ---- | ---- |
| 378806_Saurantiaca@YP_003955403      | ---- | ---- | ---- | ---- | ---- |
| 246197_Mxanthus@YP_633158            | ---- | ---- | ---- | ---- | ---- |
| 483219_Mfulvus@YP_004669542          | ---- | ---- | ---- | ---- | ---- |
| 1144275_Ccoralloides@YP_005368444    | ---- | ---- | ---- | ---- | ---- |
| 1278073_Mstipitatus@YP_007362455     | ---- | ---- | ---- | ---- | ---- |
| 448385_Scellulosum@YP_001617979      | ---- | ---- | ---- | ---- | ---- |
| 399739_Pmendocina@YP_001188990       | ---- | ---- | ---- | ---- | ---- |
| 1294143_Pdenitrificans@YP_007659193  | ---- | ---- | ---- | ---- | ---- |
| 208964_Paeruginosa@NP_252502         | ---- | ---- | ---- | ---- | ---- |
| 322710_Avinelandii@YP_002801150      | ---- | ---- | ---- | ---- | ---- |
| 644801_Pstutzeri@YP_007239445        | ---- | ---- | ---- | ---- | ---- |
| 1207075_Psp@YP_007027941             | ---- | ---- | ---- | ---- | ---- |
| 1114970_Pfluorescens@YP_005206437    | ---- | ---- | ---- | ---- | ---- |
| 220664_Pprotogens@YP_262044          | ---- | ---- | ---- | ---- | ---- |
| 351746_Pputida@YP_001266219          | ---- | ---- | ---- | ---- | ---- |
| 1435058_Pmonteilii@YP_008958359      | ---- | ---- | ---- | ---- | ---- |
| 743720_Pfulva@YP_004475358           | ---- | ---- | ---- | ---- | ---- |
| 264730_Psyringae@YP_273568           | ---- | ---- | ---- | ---- | ---- |
| 384676_Pentomophila@YP_606728        | ---- | ---- | ---- | ---- | ---- |
| 1430440_Mgryphiswaldens@YP_008937260 | ---- | ---- | ---- | ---- | ---- |
| 749219_Mcatarrhalis@YP_003626770     | ---- | ---- | ---- | ---- | ---- |
| 62977_Asp@YP_046090                  | ---- | ---- | ---- | ---- | ---- |
| 436717_Aoleivorans@YP_003732380      | ---- | ---- | ---- | ---- | ---- |
| 400667_Abaumannii@YP_001084660       | ---- | ---- | ---- | ---- | ---- |
| 871585_Acalcoacticus@YP_004995269    | ---- | ---- | ---- | ---- | ---- |
| 511062_Osp@YP_005091814              | ---- | ---- | ---- | ---- | ---- |
| 318167_Sfrigidimarina@YP_751106      | ---- | ---- | ---- | ---- | ---- |
| 326297_Samazonensis@YP_927171        | ---- | ---- | ---- | ---- | ---- |
| 318161_Sdenitrificans@YP_562467      | ---- | ---- | ---- | ---- | ---- |
| 167879_Cpsychrerythrae@YP_267876     | ---- | ---- | ---- | ---- | ---- |
| 637905_Sviolacea@YP_003556341        | ---- | ---- | ---- | ---- | ---- |
| 225849_Spiezotolerans@YP_002311055   | ---- | ---- | ---- | ---- | ---- |
| 323850_Sloihica@YP_001094441         | ---- | ---- | ---- | ---- | ---- |
| 425104_Ssediminis@YP_001474605       | ---- | ---- | ---- | ---- | ---- |
| 392500_Swoodyi@YP_001760156          | ---- | ---- | ---- | ---- | ---- |
| 60481_Ssp@YP_737869                  | ---- | ---- | ---- | ---- | ---- |
| 211586_Soneidensis@NP_717861         | ---- | ---- | ---- | ---- | ---- |
| 693973_Sbaltica@YP_005273706         | ---- | ---- | ---- | ---- | ---- |
| 399804_Sputrefaciens@YP_006009782    | ---- | ---- | ---- | ---- | ---- |
| 298386_Sprofundum@YP_128966          | ---- | ---- | ---- | ---- | ---- |
| 28173_Vnigripulchritu@YP_008621944   | ---- | ---- | ---- | ---- | ---- |
| 1219076_Valginolyticus@YP_008537102  | ---- | ---- | ---- | ---- | ---- |
| 150340_Vsp@YP_003286982              | ---- | ---- | ---- | ---- | ---- |
| 345073_Vcholerae@YP_001216234        | ---- | ---- | ---- | ---- | ---- |
| 223926_Vparahaemolytic@NP_796976     | ---- | ---- | ---- | ---- | ---- |
| 882102_Vanguillarum@YP_004566935     | ---- | ---- | ---- | ---- | ---- |
| 575788_Vsplendidus@YP_002416251      | ---- | ---- | ---- | ---- | ---- |
| 1129794_Vpsychrophila@YP_007545568   | ---- | ---- | ---- | ---- | ---- |
| 196600_Vvulnificus@NP_933549         | ---- | ---- | ---- | ---- | ---- |
| 903510_Vfurnissii@YP_004993913       | ---- | ---- | ---- | ---- | ---- |
| 338187_Vcampbellii@YP_001444276      | ---- | ---- | ---- | ---- | ---- |
| 338187_Vcampbellii@YP_008526292      | ---- | ---- | ---- | ---- | ---- |
| 314282_Psp@YP_007639631              | ---- | ---- | ---- | ---- | ---- |
| 357804_Pingrahamii@YP_942749         | ---- | ---- | ---- | ---- | ---- |
| 326442_Phaloplanktis@YP_341160       | ---- | ---- | ---- | ---- | ---- |
| 234831_Psp@YP_004067531              | ---- | ---- | ---- | ---- | ---- |
| 595494_Tauensis@YP_002893203         | ---- | ---- | ---- | ---- | ---- |
| 396588_Tsulfidiphilus@YP_002513559   | ---- | ---- | ---- | ---- | ---- |
| 396588_Tsulfidiphilus@YP_002514125   | ---- | ---- | ---- | ---- | ---- |
| 998088_Averonii@YP_004393031         | ---- | ---- | ---- | ---- | ---- |
| 380703_Ahydrophila@YP_856284         | ---- | ---- | ---- | ---- | ---- |
| 382245_Asalmonicida@YP_001142383     | ---- | ---- | ---- | ---- | ---- |
| 342108_Mmagneticum@YP_422390         | ---- | ---- | ---- | ---- | ---- |
| 1245471_Presinovorans@YP_008101472   | ---- | ---- | ---- | ---- | ---- |
| 365044_Pnaphthalenivor@YP_982518     | ---- | ---- | ---- | ---- | ---- |
| 296591_Psp@YP_549004                 | ---- | ---- | ---- | ---- | ---- |
| 232721_Asp@YP_986388                 | ---- | ---- | ---- | ---- | ---- |
| 535289_Aebreus@YP_002553097          | ---- | ---- | ---- | ---- | ---- |
| 365046_Rtataouinensis@YP_004618947   | ---- | ---- | ---- | ---- | ---- |
| 946483_CSymbiobacter@YP_008681130    | ---- | ---- | ---- | ---- | ---- |
| 312309_Vfischeri@YP_204001           | ---- | ---- | ---- | ---- | ---- |
| 595537_Vparadoxus@YP_004156043       | ---- | ---- | ---- | ---- | ---- |
| 316275_Asalmonicida@YP_002262235     | ---- | ---- | ---- | ---- | ---- |
| 391735_Veiseniae@YP_997138           | ---- | ---- | ---- | ---- | ---- |
| 397945_Acitrullii@YP_970793          | ---- | ---- | ---- | ---- | ---- |
| 643561_Aavenae@YP_004235248          | ---- | ---- | ---- | ---- | ---- |
| 398578_Dacidovorans@YP_001565014     | ---- | ---- | ---- | ---- | ---- |
| 742013_Dsp@YP_004488168              | ---- | ---- | ---- | ---- | ---- |
| 338969_Aferrireducens@YP_523433      | ---- | ---- | ---- | ---- | ---- |
| 596154_Adenitrificans@YP_004388278   | ---- | ---- | ---- | ---- | ---- |
| 688245_Ctestosteroni@YP_003278774    | ---- | ---- | ---- | ---- | ---- |

|                                      |      |      |      |      |           |
|--------------------------------------|------|------|------|------|-----------|
| 1266738_Pmirabilis@YP_008398502      | ---- | ---- | ---- | ---- | ----      |
| 1124991_Mmorganii@YP_007505117       | ---- | ---- | ---- | ---- | ----      |
| 406817_Xnematophila@YP_003713469     | ---- | ---- | ---- | ---- | ----      |
| 291112_Pasymbiotica@YP_003040200     | ---- | ---- | ---- | ---- | ----      |
| 243265_Pluminescens@NP_930506        | ---- | ---- | ---- | ---- | ----      |
| 406818_Xbovieni@YP_003468915         | ---- | ---- | ---- | ---- | ----      |
| 273123_Ypseudotubercul@YP_071365     | ---- | ---- | ---- | ---- | ----      |
| 393305_Yenterocolitica@YP_001005390  | ---- | ---- | ---- | ---- | ----      |
| 1346614_Sliquefaciens@YP_008231656   | ---- | ---- | ---- | ---- | ----      |
| 1348660_Splymuthica@YP_008160622     | ---- | ---- | ---- | ---- | ----      |
| 399741_Sproteamaculans@YP_001479850  | ---- | ---- | ---- | ---- | ----      |
| 1249634_Smarcens@YP_007345780        | ---- | ---- | ---- | ---- | ----      |
| 187410_Ypestis@NP_668657             | ---- | ---- | ---- | ---- | ----      |
| 1157951_Pstuartii@YP_006215182       | ---- | ---- | ---- | ---- | ----      |
| 344609_Sboydii@YP_001881320          | ---- | ---- | ---- | ---- | ----      |
| 104623_Ssp@YP_008524031              | ---- | ---- | ---- | ---- | ----      |
| 561229_Dzeae@YP_003003456            | ---- | ---- | ---- | ---- | ----      |
| 590409_Ddadantii@YP_003334610        | ---- | ---- | ---- | ---- | ----      |
| 561230_Pcarotovorum@YP_003018589     | ---- | ---- | ---- | ---- | ----      |
| 561231_Pwasabiae@YP_003258666        | ---- | ---- | ---- | ---- | ----      |
| 1166016_Psp@YP_006282128             | ---- | ---- | ---- | ---- | ----      |
| 218491_Patrosepticum@YP_051325       | ---- | ---- | ---- | ---- | ----      |
| 99287_Senterica@NP_461477            | ---- | ---- | ---- | ---- | ----      |
| 218493_Sbongori@YP_004731144         | ---- | ---- | ---- | ---- | ----      |
| 290339_Csakazakii@YP_001436836       | ---- | ---- | ---- | ---- | ----      |
| 693216_Cturicensis@YP_003211492      | ---- | ---- | ---- | ---- | ----      |
| 399742_Esp@YP_001177741              | ---- | ---- | ---- | ---- | ----      |
| 640513_Easburiae@YP_004829762        | ---- | ---- | ---- | ---- | ----      |
| 693444_Ebacterium@YP_007339349       | ---- | ---- | ---- | ---- | ----      |
| 290338_Ckoseri@YP_001451852          | ---- | ---- | ---- | ---- | ----      |
| 484021_Kpneumoniae@YP_002920722      | ---- | ---- | ---- | ---- | ----      |
| 637910_Crodentium@YP_003366009       | ---- | ---- | ---- | ---- | ----      |
| 640131_Kvariicola@YP_003438138       | ---- | ---- | ---- | ---- | ----      |
| 1191061_Koxytoca@YP_006500071        | ---- | ---- | ---- | ---- | ----      |
| 1286170_Rornithinolytic@YP_007872306 | ---- | ---- | ---- | ---- | ----      |
| 511145_Ecoli@NP_417024               | ---- | ---- | ---- | ---- | ----      |
| 585054_Efergusonii@YP_002381825      | ---- | ---- | ---- | ---- | ----      |
| 198214_Sflexneri@NP_708368           | ---- | ---- | ---- | ---- | ----      |
| 216599_Ssonnei@YP_005457544          | ---- | ---- | ---- | ---- | ----      |
| 300267_Sdysenteriae@YP_404261        | ---- | ---- | ---- | ---- | ----      |
| 716541_Ecloacae@YP_003614361         | ---- | ---- | ---- | ---- | ----      |
| 701347_Elignolyticus@YP_003940771    | ---- | ---- | ---- | ---- | ----      |
| 630626_Sblattae@YP_006318650         | ---- | ---- | ---- | ---- | ----      |
| 1028307_Eaerogenes@YP_004590373      | ---- | ---- | ---- | ---- | ----      |
| 557723_Hparasuis@YP_002474707        | ---- | ---- | ---- | ---- | ----      |
| 1005058_Ganatis@YP_004420698         | ---- | ---- | ---- | ---- | ----      |
| 1075089_Pmultocida@YP_005176279      | ---- | ---- | ---- | ---- | ----      |
| 205914_Hsomnus@YP_718490             | ---- | ---- | ---- | ---- | ----      |
| 1171377_Btrehalosi@YP_007548422      | ---- | ---- | ---- | ---- | ----      |
| 233412_Hducreyi@NP_873560            | ---- | ---- | ---- | ---- | ----      |
| 416269_Apleuropneumoni@YP_001053631  | ---- | ---- | ---- | ---- | ----      |
| 696748_Asuis@YP_006816777            | ---- | ---- | ---- | ---- | ----      |
| 1366053_Mhaemolytica@YP_008338465    | ---- | ---- | ---- | ---- | ----      |
| 1334187_Hinfluenzae@YP_008544790     | ---- | ---- | ---- | M    | AFARIEKRV |
| 634176_Aaphrophilus@YP_003007650     | ---- | ---- | ---- | ---- | ----      |
| 694569_Aactinomycetemc@YP_006286355  | ---- | ---- | ---- | ---- | ----      |
| 862965_Hparainfluenzae@YP_004822800  | ---- | ---- | ---- | ---- | ----      |
| 221988_Msucciniciprodu@YP_088916     | ---- | ---- | ---- | ---- | ----      |
| 339671_Asuccinogenes@YP_001344170    | ---- | ---- | ---- | ---- | ----      |
| 550540_Fbalearica@YP_003914035       | ---- | ---- | ---- | ---- | ----      |
| 396595_Tsp@YP_003460082              | ---- | ---- | ---- | ---- | ----      |
| 413404_CRuthia@YP_903798             | ---- | ---- | ---- | ---- | ----      |
| 412965_CVesicomysociu@YP_001219373   | ---- | ---- | ---- | ---- | ----      |
| 1208921_CKinetoplastiba@YP_007448562 | ---- | ---- | ---- | ---- | ----      |
| 561501_Baphidicola@YP_002468877      | ---- | ---- | ---- | ---- | ----      |
| 357244_Otsutsugamushi@YP_001248706   | ---- | ---- | ---- | MN   | NDAKIVTGR |
| 1003201_Rtyphi@YP_005427548          | ---- | ---- | ---- | ---- | ----      |
| 1105111_CRickettsia@YP_005365544     | ---- | ---- | ---- | ---- | ----      |
| 272944_Rconorii@NP_360366            | ---- | ---- | ---- | ---- | ----      |
| 452659_Rrickettsii@YP_001650107      | ---- | ---- | ---- | ---- | ----      |
| 347255_Rafricae@YP_002845312         | ---- | ---- | ---- | ---- | ----      |
| 562019_Rpeacockii@YP_002916645       | ---- | ---- | ---- | ---- | ----      |
| 1105113_Rrhipicephali@YP_005390607   | ---- | ---- | ---- | ---- | ----      |
| 416276_Rmassiliae@YP_001499486       | ---- | ---- | ---- | ---- | M         |
| 1105108_Rparkeri@YP_005392983        | ---- | ---- | ---- | ---- | ----      |
| 1105114_Rmontanensis@YP_005391246    | ---- | ---- | ---- | ---- | ----      |
| 1032845_Rheilongjiangen@YP_004764467 | ---- | ---- | ---- | ---- | ----      |
| 652620_Rjaponica@YP_004884928        | ---- | ---- | ---- | ---- | ----      |
| 481009_Rphilipii@YP_005300823        | ---- | ---- | ---- | ---- | ----      |
| 1105109_Rslovaca@YP_005426472        | ---- | ---- | ---- | ---- | ----      |
| 1105107_Rcanadensis@YP_005299497     | ---- | ---- | ---- | ---- | ----      |
| 336407_Rbellii@YP_538116             | ---- | ---- | ---- | ---- | ----      |
| 315456_Rfelis@YP_246860              | ---- | ---- | ---- | ---- | ----      |
| 293614_Rakari@YP_001493572           | ---- | ---- | ---- | ---- | ----      |
| 1105110_Raustralis@YP_005414962      | ---- | ---- | ---- | ---- | ----      |
| 434131_Nristicii@YP_003081518        | ---- | ---- | ---- | ---- | ----      |
| 222891_Nsennetsu@YP_506192           | ---- | ---- | ---- | ---- | ----      |
| 330214_CNitrospira@YP_003799619      | ---- | ---- | ---- | ---- | ----      |

|                                      |       |       |       |       |
|--------------------------------------|-------|-------|-------|-------|
| 984262_Sgrandis@YP_005322201         | ----- | ----- | ----- | ----- |
| 100901_Wendosymbiont@YP_006555868    | ----- | ----- | ----- | ----- |
| 66084_Wsp@YP_002727379               | ----- | ----- | ----- | ----- |
| 1423892_Emuris@YP_008929080          | ----- | ----- | ----- | ----- |
| 574556_Acentrale@YP_003328545        | ----- | ----- | ----- | ----- |
| 320483_Amarginale@YP_002563600       | ----- | ----- | ----- | ----- |
| 1184253_Aphagocytophilu@YP_008332775 | ----- | ----- | ----- | ----- |
| 205920_Echaffeensis@YP_507440        | ----- | ----- | ----- | ----- |
| 254945_Eruminantium@YP_180281        | ----- | ----- | ----- | ----- |
| 254945_Eruminantium@YP_197308        | ----- | ----- | ----- | ----- |
| 269484_Ecanis@YP_303050              | ----- | ----- | ----- | ----- |
| 517418_Cthalassium@YP_001997584      | ----- | ----- | ----- | ----- |
| 485917_Pheparinus@YP_003091837       | ----- | ----- | ----- | ----- |
| 762903_Psaltans@YP_004273747         | ----- | ----- | ----- | ----- |
| 929556_Scanadensis@YP_006255074      | ----- | ----- | ----- | ----- |
| 760192_Hhydrossis@YP_004446110       | ----- | ----- | ----- | ----- |
| 1162668_Lferrooxidans@YP_005469656   | ----- | ----- | ----- | ----- |
| 1048260_Lferriphilum@YP_006765680    | ----- | ----- | ----- | ----- |
| 240015_Acapsulatum@YP_002755573      | ----- | ----- | ----- | ----- |
| 204669_CKoribacter@YP_589562         | ----- | ----- | ----- | ----- |
| 1198114_Gtundricola@YP_004219465     | ----- | ----- | ----- | ----- |
| 926566_Troseus@YP_006423699          | ----- | ----- | ----- | ----- |
| 401053_Tsaanensis@YP_004180969       | ----- | ----- | ----- | ----- |
| 682795_Gmallensis@YP_005055878       | ----- | ----- | ----- | ----- |
| 696127_CMidichloria@YP_004679282     | ----- | ----- | ----- | ----- |
| 871271_CZindieria@YP_003878048       | ----- | ----- | ----- | ----- |
| 657324_Bfibrisolvens@YP_007819038    | ----- | ----- | ----- | ----- |
| 768670_Cnitroreducens@YP_004051749   | ----- | ----- | ----- | ----- |
| 717231_Fsinusarabici@YP_004603876    | ----- | ----- | ----- | ----- |
| 639282_Ddesulfuricans@YP_003496772   | ----- | ----- | ----- | ----- |
| 522772_Dacetiphilus@YP_003503972     | ----- | ----- | ----- | ----- |
| 693746_Ovalericigenes@YP_004880314   | ----- | ----- | ----- | ----- |
| 657321_Rbromii@YP_007781362          | ----- | ----- | ----- | ----- |
| 657322_Fprausnitzii@YP_007799942     | ----- | ----- | ----- | ----- |
| 213810_Rchampanellensi@YP_007828576  | ----- | ----- | ----- | ----- |
| 657319_[siraeum@YP_007775950         | ----- | ----- | ----- | ----- |
| 293826_Ametalliredigen@YP_001320267  | ----- | ----- | ----- | ----- |
| 350688_Aoremlandii@YP_001513205      | ----- | ----- | ----- | ----- |
| 546269_Falocis@YP_005054244          | ----- | ----- | ----- | ----- |
| 1511_[sticklandii@YP_003936518       | ----- | ----- | ----- | ----- |
| 699034_Pdifficile@YP_006198328       | ----- | ----- | ----- | ----- |
| 1128398_[acidurici@YP_006788189      | ----- | ----- | ----- | ----- |
| 572544_Ipolytropus@YP_003967871      | ----- | ----- | ----- | ----- |
| 469604_Fnucleatum@YP_008477745       | ----- | ----- | ----- | ----- |
| 580340_Tlienii@YP_004932350          | ----- | ----- | ----- | ----- |
| 891968_Amobile@YP_006444325          | ----- | ----- | ----- | ----- |
| 525903_Tacidaminovorans@YP_003316727 | ----- | ----- | ----- | ----- |
| 697281_Maustraliensis@YP_004463371   | ----- | ----- | ----- | ----- |
| 309799_Dthermophilum@YP_002251521    | ----- | ----- | ----- | ----- |
| 368407_Mmarisnigri@YP_001047821      | ----- | ----- | ----- | ----- |
| 903814_Elimosum@YP_003961665         | ----- | ----- | ----- | ----- |
| 931626_Awoodii@YP_005268656          | ----- | ----- | ----- | ----- |
| 410358_Mlabreanum@YP_001029708       | ----- | ----- | ----- | ----- |
| 679926_Mpetrolearius@YP_003895855    | ----- | ----- | ----- | ----- |
| 86416_Cpasteurianum@YP_007940944     | ----- | ----- | ----- | ----- |
| 929506_Cbotulinum@YP_004396224       | ----- | ----- | ----- | ----- |
| 386415_Cnovyi@YP_878355              | ----- | ----- | ----- | ----- |
| 748727_Cljungdahlii@YP_003779382     | ----- | ----- | ----- | ----- |
| 1341692_Cautoethanogenu@YP_008700753 | ----- | ----- | ----- | ----- |
| 747365_Tnarugense@YP_004437867       | ----- | ----- | ----- | ----- |
| 651822_Ffastidiosum@YP_007827223     | ----- | ----- | ----- | ----- |
| 572547_Acolombiense@YP_003553035     | ----- | ----- | ----- | ----- |
| 212717_Ctetani@NP_781697             | ----- | ----- | ----- | ----- |
| 431943_Ckluyveri@YP_001394709        | ----- | ----- | ----- | ----- |
| 573061_Ccellulovorans@YP_003843335   | ----- | ----- | ----- | ----- |
| 508767_Cbotulinum@YP_001920515       | ----- | ----- | ----- | ----- |
| 931276_Csaccharoperbut@YP_007454264  | ----- | ----- | ----- | ----- |
| 290402_Cbeijerinckii@YP_001308237    | ----- | ----- | ----- | ----- |
| 1345695_Csaccharobutyli@YP_008674363 | ----- | ----- | ----- | ----- |
| 269797_Mbarkeri@YP_305925            | ----- | ----- | ----- | ----- |
| 188937_Macetivorans@NP_617616        | ----- | ----- | ----- | ----- |
| 195103_Cperfringens@YP_696469        | ----- | ----- | ----- | ----- |
| 593750_Mformicica@YP_007249963       | ----- | ----- | ----- | ----- |
| 456442_Mboonei@YP_001405283          | ----- | ----- | ----- | ----- |
| 521011_Mpalustris@YP_002466865       | ----- | ----- | ----- | ----- |
| 323259_Mhungatei@YP_503638           | ----- | ----- | ----- | ----- |
| 547558_Mmahii@YP_003541558           | ----- | ----- | ----- | ----- |
| 644295_Mvestigatum@YP_003727500      | ----- | ----- | ----- | ----- |
| 351627_Csaccharolyticu@YP_001181022  | ----- | ----- | ----- | ----- |
| 521460_Cbescii@YP_002573580          | ----- | ----- | ----- | ----- |
| 632292_Chydrothermalis@YP_003992133  | ----- | ----- | ----- | ----- |
| 632348_Ckronotskyensis@YP_004023692  | ----- | ----- | ----- | ----- |
| 632335_Ckristjanssonii@YP_004026829  | ----- | ----- | ----- | ----- |
| 632516_Clactoaceticus@YP_004798736   | ----- | ----- | ----- | ----- |
| 608506_Cobsidiansis@YP_003840166     | ----- | ----- | ----- | ----- |
| 632518_Cowensensis@YP_004002802      | ----- | ----- | ----- | ----- |
| 1121335_[stercorarium@YP_007372524   | ----- | ----- | ----- | ----- |
| 1121335_[stercorarium@YP_007678972   | ----- | ----- | ----- | ----- |

MGCI GG

MA  
MA  
MA  
MA

M

M

MGRLF KKSKGRGEII

|                                      |            |            |              |            |            |
|--------------------------------------|------------|------------|--------------|------------|------------|
| 755731_Csp@YP_005148252              | ----       | ----       | ----         | ----       | ----       |
| 394503_Ccellulolyticum@YP_002506259  | ----       | ----       | ----         | ----       | ----       |
| 720554_[clariflavum@YP_005046370     | ----       | ----       | ----         | ----       | ----       |
| 203119_Rthermocellum@YP_001037149    | ----       | ----       | ----         | ----       | ----       |
| 642492_Clentocellum@YP_004309737     | ----       | ----       | ----         | ----       | ----       |
| 1384484_Aequolifaciens@YP_008663926  | ----       | ----       | ----         | ----       | M          |
| 515619_Erectale@YP_002936246         | ----       | ----       | ----         | ----       | ----       |
| 718255_Rintestinalis@YP_007780168    | ----       | ----       | ----         | ----       | ----       |
| 657315_Rintestinalis@YP_007830593    | ----       | ----       | ----         | ----       | ----       |
| 357809_Lphytofermentan@YP_001560003  | ----       | ----       | ----         | ----       | ----       |
| 610130_[saccharolyticu@YP_003823446  | ----       | ----       | ----         | ----       | ----       |
| 717608_[cf@YP_007849106              | ----       | ----       | ----         | ----       | ----       |
| 245012_bproducing@YP_007810477       | ----       | ----       | ----         | ----       | ----       |
| 657313_Rtorques@YP_007786815         | ----       | ----       | ----         | ----       | ----       |
| 245018_bproducing@YP_007788847       | ----       | ----       | ----         | ----       | ----       |
| 585394_Rhominis@YP_004837975         | ----       | ----       | ----         | ----       | ----       |
| 1054217_Tarchaeon@YP_007688600       | ----       | ----       | ----         | ----       | MY         |
| 657323_Rsp@YP_007784833              | ----       | ----       | ----         | ----       | ----       |
| 657314_Robeum@YP_007804234           | ----       | ----       | ----         | ----       | ----       |
| 717962_Ccatus@YP_007770008           | ----       | ----       | ----         | ----       | ----       |
| 552811_Dlykanthroporep@YP_003758020  | ----       | ----       | ----         | ----       | MNNG       |
| 246194_Chydrogenoforma@YP_361011     | ----       | ----       | ----         | ----       | ----       |
| 696281_Druminis@YP_004546667         | ----       | ----       | ----         | ----       | ----       |
| 868595_Dcarboxydivoran@YP_004497987  | ----       | ----       | ----         | ----       | ----       |
| 349161_Dreducens@YP_001112128        | ----       | ----       | ----         | ----       | ----       |
| 634498_Mruminantium@YP_003424309     | ----       | ----       | ----         | ----       | ----       |
| 406327_Mvannieli@YP_001322697        | ----       | ----       | ----         | ----       | ----       |
| 679901_Mzhilinae@YP_004616912        | ----       | ----       | ----         | ----       | ----       |
| 224719_Msp@YP_008075510              | ----       | ----       | ----         | ----       | ----       |
| 339860_Mstadtmanae@YP_448034         | ----       | ----       | ----         | ----       | ----       |
| 1295009_CMethanomassili@YP_008071572 | ----       | ----       | ----         | ----       | ----       |
| 420247_Msmithii@YP_001272836         | ----       | ----       | ----         | ----       | ----       |
| 1041930_Mconradii@YP_005380864       | ----       | ----       | ----         | ----       | ----       |
| 304371_Mpaludicola@YP_003355464      | ----       | ----       | ----         | ----       | ----       |
| 1379702_Msp@YP_008915990             | ----       | ----       | ----         | ----       | ----       |
| 351160_Marvoryzae@YP_686139          | ----       | ----       | ----         | ----       | ----       |
| 990316_Mconcilii@YP_004384883        | ----       | ----       | ----         | ----       | MAKGRWMA   |
| 521011_Mpalustris@YP_002466708       | ----       | ----       | ----         | ----       | MEDVP      |
| 1201294_Mbourgensis@YP_006544991     | ----       | ----       | ----         | ----       | MTD        |
| 368407_Mmarisnigri@YP_001048051      | ----       | ----       | ----         | ----       | MAD        |
| 635013_Tpotens@YP_003640662          | ----       | ----       | ----         | ----       | ----       |
| 457570_Nthermophilus@YP_001916489    | ----       | ----       | ----         | ----       | ----       |
| 574087_Aarabaticum@YP_003827335      | ----       | ----       | ----         | ----       | ----       |
| 748449_Hhalobius@YP_007315822        | ----       | ----       | ----         | ----       | ----       |
| 338963_Pcarbinolicus@YP_006717600    | ----       | ----       | ----         | ----       | ----       |
| 498761_Hmodesticaldum@YP_001680434   | ----       | ----       | ----         | ----       | ----       |
| 768704_Dmeridiei@YP_006620851        | ----       | ----       | ----         | ----       | ----       |
| 768706_Dorientis@YP_004969159        | ----       | ----       | ----         | ----       | ----       |
| 1147129_Dsp@YP_006909410             | ----       | ----       | ----         | ----       | ----       |
| 138119_Dhafniense@YP_518658          | ----       | ----       | ----         | ----       | M          |
| 645991_Sglycolicus@YP_004266248      | ----       | ----       | ----         | ----       | ----       |
| 646529_Dacidiphilus@YP_006467680     | ----       | ----       | ----         | ----       | ----       |
| 272564_Dhafniense@YP_002460033       | ----       | ----       | ----         | ----       | ----       |
| 756499_Ddehalogenans@YP_006431093    | ----       | ----       | ----         | ----       | ----       |
| 871963_Ddichloroelimin@YP_007221311  | ----       | ----       | ----         | ----       | ----       |
| 767817_Dgibsoniae@YP_007945765       | ----       | ----       | ----         | ----       | ----       |
| 485916_Dacetoxidans@YP_003191710     | ----       | ----       | ----         | ----       | ----       |
| 555079_Toceani@YP_003825515          | ----       | ----       | ----         | ----       | ----       |
| 349307_Mthermophila@YP_843171        | ----       | ----       | ----         | ----       | MIQ        |
| 760568_Dkuznetsovii@YP_004517387     | ----       | ----       | ----         | ----       | ----       |
| 373903_Horenii@YP_002508640          | ----       | ----       | ----         | ----       | ----       |
| 370438_Pthermopropioni@YP_001211605  | ----       | ----       | ----         | ----       | ----       |
| 264732_Mthermoacetica@YP_430496      | ----       | ----       | ----         | ----       | ----       |
| 96561_Doleovorans@YP_001528642       | ----       | ----       | ----         | ----       | ----       |
| 471821_uTermite@YP_001956213         | ----       | ----       | ----         | ----       | ----       |
| 429009_Adegensii@YP_003238425        | ----       | ----       | ----         | ----       | ----       |
| 706587_Dtiedjei@YP_006449617         | ----       | ----       | ----         | ----       | ----       |
| 589924_Fplacidus@YP_003435557        | ----       | ----       | ----         | ----       | ----       |
| 224325_Afulgidus@NP_069024           | ----       | ----       | ----         | ----       | ----       |
| 224325_Afulgidus@NP_069399           | ----       | ----       | ----         | ----       | ----       |
| 416591_Tlettingae@YP_001470347       | ----       | ----       | ----         | ----       | ----       |
| 688269_Tthermarum@YP_004660083       | ----       | ----       | ----         | ----       | ----       |
| 374847_CKorarchaeum@YP_001737319     | ----       | ----       | ----         | ----       | MSTRV      |
| 583356_Iaggregans@YP_003860035       | ----       | ----       | ----         | ----       | MSTRI      |
| 272947_Rprowazekii@NP_220862         | ----       | ----       | ----         | ----       | ----       |
| 1282356_Ppoae@YP_007398800           | ----       | ----       | ----         | ----       | ----       |
| 994484_Pbrassicacearum@YP_004352099  | ----       | ----       | ----         | ----       | ----       |
| 882944_Languillarum@YP_008488748     | ----       | ----       | ----         | ----       | ----       |
| 1167634_Axylosoxidans@YP_008032542   | ----       | ----       | ----         | ----       | ----       |
| 257311_Bparapertussis@NP_884287      | ----       | ----       | ----         | ----       | ----       |
| 1017264_Bpertussis@YP_005589900      | ----       | ----       | ----         | ----       | ----       |
| 284812_Spombe@NP_592967              | MSVFRRSVQC | VGVLPSILAQ | RSSLARPAN    | LQFLKTNSSK | FVPCVTANVS |
| 559292_Scerevisiae@NP_014869         | ----       | ----       | ----         | ----       | LTGSHITRAA |
| 559292_Scerevisiae@NP_015190         | ----       | ----       | MFA          | RLANPAHFKP | MGVLRASSIT |
| 9606_Hsapiens@NP_998760              | ----       | ----       | M LPVITRFARP | ALMAIRPVNA | RLPARELSAP |
| 9606_Hsapiens@NP_055116              | ----       | ----       | M AAAGAFRLRR | AASALLLRSP | MVLIDM     |
| 3702_Athaliana@NP_193953             | ----       | ----       | ----         | MMLKO      | AAKKALGLTS |
| 3702_Athaliana@NP_192317             | ----       | ----       | ----         | MLRQ       | TTKRAFLGLA |
|                                      | ----       | ----       | ----         | ----       | SONPTFPFVV |

3702\_Athaliana@NP\_186751

7227\_Dmelanogaster@NP\_649840

6239\_Celegans@NP\_502658

-----  
-----  
-----

|     |    |     |     |     |    |     |     |     |
|-----|----|-----|-----|-----|----|-----|-----|-----|
| MM  | LR | TS  | RK  | AYL | GL | QAS | PL  | GLG |
| MS  | LV | RNS | SRL | LR  | SL | KRV | QSV | P   |
| MSL | QI | SS  | AAK | TLL | HK | FAL | PA  | ATS |



|                                      |        |       |            |         |     |            |            |
|--------------------------------------|--------|-------|------------|---------|-----|------------|------------|
| 243233_Mcapsulatus@YP_112782         | -MAYS  | DKVID | HYENPRNVGS | F-DKDED | -GV | GTGVVGAPAC | GDVMKLOIKI |
| 458817_Shalfaxensis@YP_001673798     | -MAYS  | EKVID | HYENPRNVGS | F-DKNDP | -SV | VTGMVGAPAC | GDVMKLOLRI |
| 398579_Spealeana@YP_001501349        | -MAYS  | EKVID | HYENPRNVGS | F-DKNDP | -SV | VTGMVGAPAC | GDVMKLOLRI |
| 557598_Lhongkongensis@YP_002796852   | -MAYS  | EKVID | HYEHPRNVGS | F-EKGDS | -SV | GTGMVGAPAC | GDVMKLOIKV |
| 521006_Ngonorrhoeae@YP_002001906     | -MAYS  | DKVID | HYENPRNVGT | F-DKNDE | -SV | GTGMVGAPAC | GDVMRLOIKV |
| 489653_Nlactamica@YP_004048810       | -MAYS  | DKVID | HYENPRNVGT | F-DKNDE | -SV | GTGMVGAPAC | GDVMRLOIKV |
| 935589_Nmeningitidis@YP_005903962    | -MAYS  | DKVID | HYENPRNVGT | F-DKNDE | -SV | GTGMVGAPAC | GDVMRLOIKV |
| 395495_Lcholodnii@YP_001790394       | -MAYS  | DKVID | HYENPRNVGG | F-TAEDD | -DV | GTGMVGAPAC | GDVMKLOIKV |
| 999541_Bgladioli@YP_004361365        | -MSYS  | NKVL  | HYENPRNVGS | F-SKDDD | -AV | GTGMVGAPAC | GDVMKLOIRV |
| 983917_Rgelatinosus@YP_005439140     | -MAYS  | EKVID | HYENPRNVGG | F-AAGDD | -TV | ATGMVGAPAC | GDVMKLOIKV |
| 1416914_Bpnomenus@YP_008837319       | -MSYS  | KEVLD | HYENPRNVGS | F-EKGDD | -AV | GTGMVGAPAC | GDVMKLOIRV |
| 1380774_Psp@YP_008881415             | -MSYS  | KEVLD | HYENPRNVGS | F-EKGDD | -AV | GTGMVGAPAC | GDVMKLOIRV |
| 1249661_Bthailandensis@YP_007917844  | -MSYS  | NKVL  | HYENPRNVGS | F-AKDD  | -AV | GTGMVGAPAC | GDVMKLOIRV |
| 320388_Bmallei@YP_993528             | -MSYS  | NKVL  | HYENPRNVGS | F-AKDD  | -TV | GTGMVGAPAC | GDVMKLOIRV |
| 536230_Bpseudomallei@YP_002897469    | -MSYS  | NKVL  | HYENPRNVGS | F-AKDD  | -TV | GTGMVGAPAC | GDVMKLOIRV |
| 395019_Bmultivorans@YP_001579332     | -MSYS  | NKVL  | HYENPRNVGS | F-AKDD  | -AV | GTGMVGAPAC | GDVMKLOIRV |
| 626418_Bglumae@YP_002912250          | -MSYS  | NKVL  | HYENPRNVGS | F-SKGDD | -AV | GTGMVGAPAC | GDVMKLOIRV |
| 365044_Pnaphthalenivor@YP_981803     | -MAYS  | DKVVD | HYENPRNVGA | F-EAGDD | -SV | GTGMVGAPAC | GDVMRLOIRV |
| 266265_Bxenovorans@YP_553871         | -MAYS  | DKVID | HYENPRNVGA | F-DDAA  | -NV | GTGMVGAPAC | GDVMRLOIRV |
| 269482_Bvietnamiensis@YP_001115172   | -MAYS  | DKVLD | HYENPRNVGS | F-DAGAD | -DV | GTGMVGAPAC | GDVMRLOIRV |
| 583345_Mmobilis@YP_003049105         | -MAYS  | DKVLD | HYENPRNVGS | L-DKNDP | -QV | GTGMVGAPAC | GDVMKLMIKV |
| 666681_Mversatilis@YP_003674921      | -MAYS  | DKVLD | HYENPRNVGT | L-DKNDP | -NV | GTGMVGAPAC | GDVMKLMIKV |
| 391038_Bphymatum@YP_001857685        | -MAYS  | DKVLD | HYENPRNVGS | F-AKDD  | -TV | GTGMVGAPAC | GDVMKLOIRV |
| 398577_Bambifaria@YP_001808732       | -MSYS  | NKVL  | HYENPRNVGS | F-AKDD  | -AV | GTGMVGAPAC | GDVMKLOIRV |
| 269482_Bvietnamiensis@YP_001120041   | -MSYS  | NKVL  | HYENPRNVGS | F-AKDD  | -AV | GTGMVGAPAC | GDVMKLOIRV |
| 406425_Bcenocapacia@YP_001765425     | -MSYS  | NKVL  | HYENPRNVGS | F-AKDD  | -TV | GTGMVGAPAC | GDVMKLOIRV |
| 1009846_Bcepacia@YP_006615433        | -MSYS  | NKVL  | HYENPRNVGS | F-AKDD  | -AV | GTGMVGAPAC | GDVMKLOIRV |
| 482957_Blata@YP_369669               | -MSYS  | NKVL  | HYENPRNVGS | F-AKDD  | -TV | GTGMVGAPAC | GDVMKLOIRV |
| 748280_Psp@YP_004848592              | -MAYS  | ECVLD | HYENPRNVGS | F-DKGDD | -SV | GTGMVGAPAC | GDVMKLOIKV |
| 1229205_Bphenoliruptrix@YP_006834626 | IMAYS  | DKVLD | HYENPRNVGS | F-SKDD  | -AV | GTGMVGAPAC | GDVMKLOIRV |
| 1163617_Sdenitrificans@YP_008546117  | -MSYS  | TKVLD | HYENPRNVGT | F-GKDDA | -GV | ATGMVGAPAC | GDVMKLOIKV |
| 266265_Bxenovorans@YP_559453         | -MAYS  | DKVLD | HYENPRNVGS | F-AKDD  | -AV | GTGMVGAPAC | GDVMKLOIRV |
| 398527_Bphytofirmans@YP_001896197    | -MAYS  | DKVLD | HYENPRNVGS | F-AKDD  | -AV | GTGMVGAPAC | GDVMKLOIRV |
| 375286_Jsp@YP_001352943              | -MAYS  | DKVLD | HYENPRNVGA | F-DKGDE | -TI | GTGMVGAPAC | GDVMKLOIKV |
| 204773_Harsenicoxydans@YP_001100494  | -MAYS  | DKVLD | HYENPRNVGA | F-DKGDE | -TI | GTGMVGAPAC | GDVMKLOIKV |
| 580332_Slithotrophicus@YP_003524869  | -MAYS  | EKVID | HYEHPRNVGS | L-DKDDA | -YV | GTGMVGAPAC | GDVMKLOIKV |
| 159087_Daromatica@YP_285167          | -MSYS  | VKVID | HYENPRNVGS | F-AKEDD | -GV | GTGMVGAPAC | GDVMKLOIKV |
| 882378_Brhizoxinica@YP_004029636     | -MAYS  | DKVLD | HYENPRNVGS | F-AKDD  | -AV | GTGMVGAPAC | GDVMKLOIRV |
| 85643_Tsp@YP_002355840               | -MAYS  | EKVID | HYENPRNVGS | F-GKEEE | -GV | ATGMVGAPAC | GDVMKLOIKV |
| 757424_Hseropedicae@YP_003776230     | -MAYS  | DKLMD | HYENPRNVGS | F-DKDD  | -SV | ATGMVGAPAC | GDVMKLOIKV |
| 522306_Caccumulibacter@YP_003167247  | -MSYS  | VKVID | HYENPRNVGS | F-GKEEE | -GV | ATGMVGAPAC | GDVMKLOIKV |
| 76114_Aaromaticum@YP_160687          | -MAYS  | EKVID | HYENPRNVGA | F-GKEDE | -GV | GTGMVGAPAC | GDVMKLOIKV |
| 381666_Reutropha@YP_725668           | -MSYS  | TKVLD | HYENPRNVGS | F-DKNDD | -AV | GTGMVGAPAC | GDVMKLOIKV |
| 977880_Ctaiwanensis@YP_002005171     | -MSYS  | TKVLD | HYENPRNVGS | F-DKNDD | -AV | GTGMVGAPAC | GDVMKLOIKV |
| 1042878_Cnecator@YP_004684939        | -MSYS  | TKVLD | HYENPRNVGS | F-DKNDD | -AV | GTGMVGAPAC | GDVMKLOIKV |
| 266264_Cmetallidurans@YP_583181      | -MSYS  | NKVL  | HYENPRNVGS | F-DKNDD | -AV | GTGMVGAPAC | GDVMKLOIKV |
| 395494_Ccapsiferriiform@YP_003846450 | -MAYS  | EKLLD | HYENPRNVGS | F-GKDD  | -GL | GTGMVGAPAC | GDVMKLOIKV |
| 859655_Rsolanacearum@YP_005996961    | -MSYS  | NKVL  | HYENPRNVGA | F-EKGDD | -TV | GTGMVGAPAC | GDVMKLOIKV |
| 402626_Rpickettii@YP_001898467       | -MSYS  | NKVL  | HYENPRNVGS | F-EKGDD | -TV | GTGMVGAPAC | GDVMKLOIKV |
| 543913_Bproteobacteriu@YP_007502653  | -MAYS  | DKVID | HYENPRNVGS | F-EKGDD | -QV | GTGMVGAPAC | GDVMKLOIRV |
| 62928_Asp@YP_933519                  | -MAYS  | DKLLD | HYENPRNVGS | F-GKDD  | -GV | ATGMVGAPAC | GDVMKLOIKV |
| 640081_Dsuillum@YP_005028573         | -MAYS  | VKVID | HYENPRNVGS | F-TKEEE | -GV | GTGMVGAPAC | GDVMKLOIKV |
| 452638_Pnecessarius@YP_001797351     | -MAYS  | EKVID | HYENPRNVGS | F-EKGDD | -SV | GTGMVGAPAC | GDVMKLOIRV |
| 292415_Tdenitrificans@YP_314923      | -MSYS  | DKVLD | HYENPRNVGA | F-NKED  | -GV | GTGMVGAPAC | GDVMKLOIKV |
| 265072_Mflagellatus@YP_544916        | -MAYS  | DKVLD | HYENPRNVGS | L-DKNDP | -SV | GTGMVGAPAC | GDVMKLOIKV |
| 582744_Mglucosetrophus@YP_003051619  | -MAYS  | DKVLD | HYENPRNVGT | L-DKNDP | -SV | GTGMVGAPAC | GDVMKLOIKV |
| 887061_Msp@YP_004040241              | -MAYS  | DKVLD | HYENPRNVGT | L-DKNDP | -SV | GTGMVGAPAC | GDVMKLOIKV |
| 891398_CTremblaya@YP_004707015       | MGVYS  | KRVME | YCNDRNVGS  | L-PEHE  | -DV | GTGVAGSEAC | GDVMRLOVRI |
| 426114_Tarsenitoxydans@YP_003623866  | IMAYS  | DKVVD | HYENPRNVGS | F-SKDDP | -QV | GTGMVGAPAC | GDVMKLOIRV |
| 75379_Tintermedia@YP_003642782       | -MAYS  | DKVVD | HYENPRNVGS | F-AKDDP | -QV | GTGMVGAPAC | GDVMKLOIRV |
| 937774_Tequigenitalis@YP_004130301   | -MAYS  | EKVID | HYENPRNVGS | F-DKSDD | -SV | GTGMVGAPAC | GDVMKLOIKV |
| 1008459_Tasinigenitalis@YP_004874474 | -MAYS  | EKVID | HYENPRNVGS | F-DKSDE | -SV | GTGMVGAPAC | GDVMKLOIKV |
| 634503_Eictaluri@YP_002934567        | -MAYS  | DKVID | HYENPRNVGS | F-DNSDP | -NV | GSVMVGAPAC | GDVMKLOIKV |
| 718251_Etarda@YP_005700147           | -MAYS  | DKVID | HYENPRNVGS | F-DNSDP | -NV | GSVMVGAPAC | GDVMKLOIKV |
| 259536_Parcticus@YP_264760           | -MAYS  | DOVID | HYENPRNVGN | L-DKNAK | -NV | GTGMVGAPAC | GDVMRLOICV |
| 335284_Pcryohalolentis@YP_580918     | -MAYS  | DOVID | HYENPRNVGN | L-DKNAK | -NV | GTGMVGAPAC | GDVMRLOICV |
| 571800_Psp@YP_008163576              | -MAYS  | DOVID | HYENPRNVGN | L-DKNAK | -NV | GTGMVGAPAC | GDVMRLOICV |
| 420662_Mpetroleiphilum@YP_001021452  | -MAYS  | EKVVE | HYENPRNVGS | F-EKGDD | -TV | GTGMVGAPAC | GDVMKLOIKV |
| 243365_Cviolaceum@NP_900763          | -MAYS  | EKVID | HYENPRNVGS | F-DKGDD | -SI | GTGMVGAPAC | GDVMKLOIKV |
| 1208919_CKinetoplastiba@YP_007459239 | -MAYS  | SKVLD | HYENPRNVGS | L-DKTD  | -SV | GTGMVGAPAC | GDVMKLOIKV |
| 983545_Gsp@YP_004435367              | -MAYS  | EKVID | HYENPRNVGG | F-DKSDP | -SI | ATGMVGAPAC | GDVMKLOLKI |
| 342610_Patlantica@YP_660819          | -MAYS  | EKVID | HYENPRNVGG | F-DKNDP | -SI | ATGMVGAPAC | GDVMKLOLKI |
| 743299_Aferriivorans@YP_004783591    | -MAYS  | EKVID | HYENPRNVGA | M-DKDD  | -GV | GTGMVGAPAC | GDVMRLOIKV |
| 243159_Aferriivorans@YP_002425162    | -MAYS  | EKVID | HYEHPRNVGA | L-DKDD  | -GV | GTGMVGAPAC | GDVMRLOIRV |
| 1005048_Cfungivorans@YP_004753777    | -MSYS  | EKVID | HYENPRNVGA | F-EKGDE | -TV | GTGMVGAPAC | GDVMKLOIKV |
| 669502_CProffftella@YP_008343646     | -MSYS  | EKVID | HYENPRNVGV | F-EKND  | -TV | GTGMVGAPAC | GDVMKLOIKV |
| 757424_Hseropedicae@YP_003776535     | -MSYS  | EKVID | HYENPRNVGA | F-EKGDE | -TV | GTGMVGAPAC | GDVMKLOIKV |
| 395495_Lcholodnii@YP_001790080       | -MAYS  | DKVID | HYEHPRNVGA | F-EKGDE | -SV | GTGMVGAPAC | GDVMKLOIKV |
| 257310_Bbronchiseptica@NP_888820     | -MAYS  | SKVLD | HYENPRNVGS | F-DKDD  | -SV | GTGMVGAPAC | GDVMKLOIKV |
| 990288_Acaldus@YP_004748177          | -MAYS  | EKVID | HYENPRNVGS | F-DKGDE | -SV | GTGMVGAPAC | GDVMRLOIRV |
| 990288_Acaldus@YP_004748110          | -MAYS  | RKVID | HYEHPRNVGS | F-DKNA  | -EV | GTGMVGAPAC | GDVMRLOIKV |
| 983917_Rgelatinosus@YP_005436383     | -MAYS  | DKVVD | HYENPRNVGA | F-EKGDE | -TV | GTGMVGAPAC | GDVMRLOIKV |
| 360910_Bavium@YP_786035              | -MAYS  | DKVLD | HYENPRNVGS | F-EKGDD | -SV | GTGMVGAPAC | GDVMKLOIKV |
| 1036672_Akashmirensis@YP_006379415   | -MAYS  | NKVL  | HYENPRNVGS | F-EKGDE | -SI | GTGMVGAPAC | GDVMKLOIKV |
| 340100_Bpetrii@YP_001631386          | -MAYS  | SKVLD | HYENPRNVGS | F-DKGDE | -SV | GTGMVGAPAC | GDVMKLOIKV |
| 523791_Kkoreensis@YP_003146685       | -MAYS  | EKVID | HYENPRNVGS | F-EKTD  | -SI | GTGMVGAPAC | GDVMKLOIKV |
| 156889_Mmarinus@YP_866958            | -MAYNE | KEVLD | HYEKPRNVGS | M-DKDD  | -DV | GTGMVGAPAC | GDVMKLOIKV |

|                                      |       |       |            |         |      |            |            |
|--------------------------------------|-------|-------|------------|---------|------|------------|------------|
| 404589_Asp@YP_001377835              | -MAYS | DKLLD | HYEHPRNVGS | L-DKADP | DV   | GTGLVGAPAC | GDVMKLOIKV |
| 290397_Adehalogenans@YP_463806       | -MAYS | EKLLD | HYEHPRNVGS | L-DKNDP | DV   | GTGLVGAPAC | GDVMKLOIKV |
| 447217_Asp@YP_002132996              | -MAYS | EKLLD | HYEHPRNVGS | L-DKNDP | DV   | GTGLVGAPAC | GDVMKLOIKV |
| 455488_Adehalogenans@YP_002491042    | -MAYS | EKLLD | HYEHPRNVGS | L-DKNDP | DV   | GTGLVGAPAC | GDVMKLOIKV |
| 378806_Saurantiaca@YP_003955403      | -MAYS | DKVIE | HYENPRNVGT | L-DKADP | NV   | GTGLVGAPAC | GDVMRLOLRI |
| 246197_Mxanthus@YP_633158            | -MAYS | DKVIE | HYENPRNVGT | L-DKEDP | NV   | GTGLVGAPAC | GDVMRLOLKI |
| 483219_Mfulvus@YP_004669542          | -MAYS | DKVIE | HYENPRNVGT | L-DKEDP | NV   | GTGLVGAPAC | GDVMRLOLKI |
| 1144275_Ccoraloides@YP_005368444     | -MAYS | EKVIE | HYENPRNVGT | L-DKNDP | NV   | GTGLVGAPAC | GDVMRLOLKI |
| 1278073_Mstipitatus@YP_007362455     | -MAYS | DKVID | HYENPRNVGT | M-DKEDP | NV   | GTGLVGAPAC | GDVMRLOLKI |
| 448385_Scellulosum@YP_001617979      | -MAYS | DKVIE | HYENPHNVGT | L-DKNDE | RV   | GTGLVGAPAC | GDVMRLOIKV |
| 399739_Pmendocina@YP_001188990       | -MAYS | DKVID | HYENPRNVGK | L-NAEDP | DV   | GTGMVGAPAC | GDVMRLOIKV |
| 1294143_Pdenitrificans@YP_007659193  | -MAYS | DKVID | HYENPRNVGK | L-NAEDP | DV   | GTGMVGAPAC | GDVMRLOIKV |
| 208964_Paeruginosa@NP_252502         | -MAYS | EKVID | HYENPRNVGK | L-DAADP | NV   | GTGMVGAPAC | GDVMRLOIKV |
| 322710_Avinelandii@YP_002801150      | -MAYS | DKVID | HYENPRNVGK | L-DAQDP | DV   | GTGMVGAPAC | GDVMRLOIKV |
| 644801_Pstutzeri@YP_007239445        | -MAYS | DKVID | HYENPRNVGK | F-DAEDP | SI   | GTGMVGAPAC | GDVMRLOIKV |
| 1207075_Psp@YP_007027941             | -MAYS | EKVID | HYENPRNVGK | M-DAEDP | DV   | GTGMVGAPAC | GDVMRLOIKV |
| 1114970_Pfluorescens@YP_005206437    | -MAYS | EKVID | HYENPRNVGK | M-DAQDP | DV   | GTGMVGAPAC | GDVMRLOIKV |
| 220664_Pprotogens@YP_262044          | -MAYS | EKVID | HYENPRNVGK | M-NAEDP | DV   | GTGMVGAPAC | GDVMRLOIKV |
| 351746_Pputida@YP_001266219          | -MAYS | EKVID | HYENPRNVGK | M-NAEDP | DV   | GTGMVGAPAC | GDVMRLOIKV |
| 1435058_Pmonteilii@YP_008958359      | -MAYS | EKVID | HYENPRNVGK | M-NAEDP | DV   | GTGMVGAPAC | GDVMRLOIKV |
| 743720_Pfulva@YP_004475358           | -MAYS | EKVID | HYENPRNVGK | M-NAEDP | DV   | GTGMVGAPAC | GDVMRLOIKV |
| 264730_Psyringae@YP_273568           | -MAYS | EKVID | HYENPRNVGK | M-NAEDP | DV   | GTGMVGAPAC | GDVMRLOIKV |
| 384676_Pentomophila@YP_606728        | -MAYS | EKVID | HYENPRNVGK | M-NADDP | DV   | GTGMVGAPAC | GDVMRLOIKV |
| 1430440_Mgryphiswaldens@YP_008937260 | -MAYS | DKVVD | HYEHPRNVGS | M-DKDSI | DV   | GTGLVGAPAC | GDVMKLOIKV |
| 749219_Mcatarrhalis@YP_003626770     | -MAYS | DKVID | HYENPRNVGN | L-DKAAK | NV   | GTGMVGAPAC | GDVMRLOIOV |
| 62977_Asp@YP_046090                  | -MAYS | EKVID | HYENPRNVGI | L-DKNAE | NV   | GTGMVGAPAC | GDVMRLOIOV |
| 436717_Aoleivorans@YP_003732380      | -MAYS | EKVID | HYENPRNVGV | L-DKNSE | NV   | GTGMVGAPAC | GDVMRLOIOV |
| 400667_Abaumannii@YP_001084660       | ----  | ----  | ----       | ----    | ---- | MVGAPAC    | GDVMRLOIOV |
| 871585_Acalcoaceticus@YP_004995269   | -MAYS | EKVID | HYENPRNVGV | L-DKNSE | NV   | GTGMVGAPAC | GDVMRLOIOV |
| 511062_Osp@YP_005091814              | -MAYS | EKVID | HYENPRNVGG | F-DKNDP | NV   | ATGMVGAPAC | GDVMKLOLKI |
| 318167_Sfrigidimarina@YP_751106      | -MAYS | EKVID | HYENPRNVGS | F-DKNDP | SV   | VTGMVGAPAC | GDVMKLOLKI |
| 326297_Samazonensis@YP_927171        | -MAYS | EKVID | HYENPRNVGS | F-DKNDP | SV   | VTGMVGAPAC | GDVMKLOLKI |
| 318161_Sdenitrificans@YP_562467      | -MAYS | EKVID | HYENPRNVGS | F-DKNDP | SV   | VTGMVGAPAC | GDVMKLOLKI |
| 167879_Cpsychrerythrae@YP_267876     | -MAYS | EKVID | HYENPRNVGS | M-DKNDP | SV   | ATGMVGAPAC | GDVMKLOLKI |
| 637905_Sviolacea@YP_003556341        | -MAYS | EKVID | HYENPRNVGS | F-DKNDP | SV   | VTGMVGAPAC | GDVMKLOLKI |
| 225849_Spiezotolerans@YP_002311055   | -MAYS | EKVID | HYENPRNVGS | F-DKNDS | SV   | VTGMVGAPAC | GDVMKLOLRI |
| 323850_Sloihica@YP_001094441         | -MAYS | EKVID | HYENPRNVGS | F-DKNDP | SV   | VTGMVGAPAC | GDVMKLOLKI |
| 425104_Ssediminis@YP_001474605       | -MAYS | EKVID | HYENPRNVGS | F-DKNDP | SV   | VTGMVGAPAC | GDVMKLOLKI |
| 392500_Swoodyi@YP_001760156          | -MAYS | EKVID | HYENPRNVGS | F-DKNDP | SV   | VTGMVGAPAC | GDVMKLOLRI |
| 60481_Ssp@YP_737869                  | -MAYS | EKVID | HYENPRNVGS | F-DKNDP | SV   | VTGMVGAPAC | GDVMKLOLKI |
| 211586_Soneidensis@NP_717861         | -MAYS | EKVID | HYENPRNVGS | F-DKNDP | SV   | VTGMVGAPAC | GDVMKLOLKI |
| 693973_Sbaltica@YP_005273706         | -MAYS | EKVID | HYENPRNVGS | F-DKNDP | SV   | VTGMVGAPAC | GDVMKLOLKI |
| 399804_Sputrefaciens@YP_006009782    | -MAYS | EKVID | HYENPRNVGS | F-DKNDP | SV   | VTGMVGAPAC | GDVMKLOLKI |
| 298386_Sprofundum@YP_128966          | -MAYS | EKVID | HYENPRNVGS | F-DKNDK | NI   | GSGMVGAPAC | GDVMKLOIKV |
| 28173_Vnigripulchritu@YP_008621944   | -MAYS | EKVID | HYENPRNVGS | F-DKEDP | SV   | GSGMVGAPAC | GDVMKLOIKV |
| 1219076_Valginolyticus@YP_008537102  | -MAYS | EKVID | HYENPRNVGS | F-DKEDP | SV   | GSGMVGAPAC | GDVMKLOIKV |
| 150340_Vsp@YP_003286982              | -MAYS | EKVID | HYENPRNVGS | F-DKEDP | SV   | GSGMVGAPAC | GDVMKLOIKV |
| 345073_Vcholerae@YP_001216234        | -MAYS | EKVID | HYENPRNVGS | F-DKEDP | SV   | GSGMVGAPAC | GDVMKLOIKV |
| 223926_Vparahaemolytic@NP_796976     | -MAYS | EKVID | HYENPRNVGS | F-DKEDP | SV   | GSGMVGAPAC | GDVMKLOIKV |
| 882102_Vanguillarum@YP_004566935     | -MAYS | EKVID | HYENPRNVGS | F-DKEDP | TI   | GSGMVGAPAC | GDVMKLOIKV |
| 575788_Vsplendidus@YP_002416251      | -MAYS | EKVID | HYENPRNVGS | F-DKEDP | SI   | GSGMVGAPAC | GDVMKLOIKV |
| 1129794_Vpsychrophila@YP_007545568   | -MAYS | EKVID | HYENPRNVGG | F-DKNDP | SI   | ATGMVGAPAC | GDVMKLOLKI |
| 196600_Vvulnificus@NP_933549         | -MAYS | EKVID | HYENPRNVGS | F-DKEDP | SV   | GSGMVGAPAC | GDVMKLOIKV |
| 903510_Vfurnissii@YP_004993913       | -MAYS | EKVID | HYENPRNVGS | F-DKEDP | SI   | GSGMVGAPAC | GDVMRLOIKV |
| 338187_Vcampbellii@YP_001444276      | -MAYS | EKVID | HYENPRNVGS | F-DKEDP | SV   | GSGMVGAPAC | GDVMKLOIKV |
| 338187_Vcampbellii@YP_008526292      | -MAYS | EKVID | HYENPRNVGS | F-DKEDP | SV   | GSGMVGAPAC | GDVMKLOIKV |
| 314282_Psp@YP_007639631              | -MAYS | EKVID | HYENPRNVGS | FDDKDDK | SI   | ATGMVGAPAC | GDVMKLOLKI |
| 357804_Pingrahamii@YP_942749         | -MAYS | EKVID | HYENPRNVGS | F-DKDDL | SV   | ATGMVGAPAC | GDVMKLOLKI |
| 326442_Phaloplanktis@YP_341160       | -MAYS | DKVID | HYENPRNVGV | L-DKNDP | SV   | ATGMVGAPAC | GDVMKLOIKV |
| 234831_Psp@YP_004067531              | -MAYS | DKVID | HYENPRNVGA | L-DKNDP | SV   | ATGMVGAPAC | GDVMKLOIKV |
| 595494_Tauensis@YP_002893203         | -MAYS | EKVID | HYEHPRNVGS | F-DKDDP | SV   | ATGMVGAPAC | GDVMKLOLKV |
| 396588_Tsulfidiphilus@YP_002513559   | -MAYS | DKVLD | HYENPRNVGS | L-DKADP | SV   | GTGMVGAPAC | GDVMKLOIKV |
| 396588_Tsulfidiphilus@YP_002514125   | -MAYS | DKVLD | HYENPRNVGS | L-DKADP | SV   | GTGMVGAPAC | GDVMKLOIRV |
| 998088_Averonii@YP_004393031         | -MAYS | EKVID | HYENPRNVGG | F-DKNDP | SV   | ATGMVGAPAC | GDVMKLOLKI |
| 380703_Ahydrophila@YP_856284         | -MAYS | EKVID | HYENPRNVGG | F-DKNDP | SI   | ATGMVGAPAC | GDVMKLOLKI |
| 382245_Asalmonicida@YP_001142383     | -MAYS | EKVID | HYENPRNVGG | F-DKNDP | NI   | ATGMVGAPAC | GDVMKLOLKI |
| 342108_Mmagnetium@YP_422390          | -MAYS | DKVID | HYEHPRNVGA | L-DKDDS | AV   | GTGLVGAPAC | GDVMKLOIKV |
| 1245471_Presinovorans@YP_008101472   | -MAYS | EKVID | HYENPRNVGK | L-DAQDP | NV   | GTGMVGAPAC | GDVMRLOIKV |
| 365044_Pnaphthalenivor@YP_982518     | -MAYS | EKVID | HYENPRNVGS | F-EKGDE | TV   | GTGMVGAPAC | GDVMKLOIKV |
| 296591_Psp@YP_549004                 | -MAYS | EKVID | HYENPRNVGS | F-EKGDD | SV   | GTGMVGAPAC | GDVMKLOIKV |
| 232721_Asp@YP_986388                 | -MAYS | DKVID | HYENPRNVGS | F-DKGDD | SV   | GTGMVGAPAC | GDVMKLOIKV |
| 535289_Aebreus@YP_002553097          | -MAYS | DKVID | HYENPRNVGS | F-DKGDD | SV   | GTGMVGAPAC | GDVMKLOIKV |
| 365046_Rtataouinensis@YP_004618947   | -MAYS | EKVID | HYENPRNVGS | F-DKGDE | SV   | GTGMVGAPAC | GDVMKLOIKV |
| 946483_CSymbiobacter@YP_008681130    | -MAYS | EKVID | HYENPRNVGS | F-DKGDD | SV   | GTGMVGAPAC | GDVMKLOIKV |
| 312309_Vfischeri@YP_204001           | -MAYS | EKVID | HYENPRNVGS | F-EKDDP | SV   | GSGMVGAPAC | GDVMKLOIKV |
| 595537_Vparadoxus@YP_004156043       | -MAYS | EKVID | HYENPRNVGS | F-EKGDD | SV   | GTGMVGAPAC | GDVMKLOIKV |
| 316275_Asalmonicida@YP_002262235     | -MAYS | EKVID | HYENPRNVGS | F-EKDDP | SV   | GSGMVGAPAC | GDVMKLOIKV |
| 391735_Veiseniae@YP_997138           | -MAYS | EKVID | HYENPRNVGS | F-DKGDD | SV   | GTGMVGAPAC | GDVMKLOIKV |
| 397945_Acitrullii@YP_970793          | -MAYS | DKVID | HYENPRNVGS | F-DKSDD | SV   | GTGMVGAPAC | GDVMKLOIKV |
| 643561_Aavenae@YP_004235248          | -MAYS | DKVID | HYENPRNVGS | F-DKSDD | SV   | GTGMVGAPAC | GDVMKLOIKV |
| 398578_Dacidovorans@YP_001565014     | -MAYS | DKVID | HYENPRNVGS | F-DKNDE | SV   | GTGMVGAPAC | GDVMKLOIKV |
| 742013_Dsp@YP_004488168              | -MAYS | DKVID | HYENPRNVGS | F-DKNDE | SV   | GTGMVGAPAC | GDVMKLOIKV |
| 338969_Aferrireducens@YP_523433      | -MAYS | DKVID | HYENPRNVGS | F-DKGDE | SV   | GTGMVGAPAC | GDVMKLOIKV |
| 596154_Adenitrificans@YP_004388278   | -MAYS | DKVID | HYENPRNVGS | F-DKGDD | TV   | GTGMVGAPAC | GDVMKLOIKV |
| 688245_Ctestosteroni@YP_003278774    | -MAYS | EKVID | HYENPRNVGS | F-DKSDD | SV   | GTGMVGAPAC | GDVMKLOIKV |
| 1266738_Pmirabilis@YP_008398502      | -MAYS | DKVID | HYENPRNVGS | F-DNNDP | TV   | GSGMVGAPAC | GDVMKLOIKV |
| 1124991_Mmorganii@YP_007505117       | -MAYS | DKVID | HYENPRNVGS | F-DNEDP | TV   | GSGMVGAPAC | GDVMKLOIKV |
| 406817_Xnemotophila@YP_003713469     | -MAYS | DKVID | HYENPRNVGS | F-DSDDP | SV   | GSGMVGAPAC | GDVMRLOIKV |



|                                      |       |        |            |            |            |            |
|--------------------------------------|-------|--------|------------|------------|------------|------------|
| 291112_Pasymbiotica@YP_003040200     | -MAYS | EKVID  | HYENPRNVGS | F-DNEDP-TV | GSGMVGAPAC | GDVMKLOIKV |
| 243265_Pluminescens@NP_930506        | -MAYS | EKVID  | HYENPRNVGS | F-DSEDP-MV | GSGMVGAPAC | GDVMKLOIKV |
| 406818_Xbovienii@YP_003468915        | -MAYS | DKVID  | HYENPRNVGS | F-DSEDP-SV | GSGMVGAPAC | GDVMKLOIKV |
| 273123_Ypseudotubercu@YP_071365      | -MAYS | EKVID  | HYENPRNVGS | F-DSQDP-TI | GSGMVGAPAC | GDVMKLOIKV |
| 393305_Yenterocolitica@YP_001005390  | -MAYS | EKVID  | HYENPRNVGS | F-DNADP-TI | GSGMVGAPAC | GDVMKLOIKV |
| 1346614_Sliquefaciens@YP_008231656   | -MAYS | EKVID  | HYENPRNVGS | F-DNEDP-SV | GSGMVGAPAC | GDVMKLOIKV |
| 1348660_Splymuthica@YP_008160622     | -MAYS | EKVID  | HYENPRNVGS | F-DNEDP-TV | GSGMVGAPAC | GDVMKLOIKV |
| 399741_Sproteamaculans@YP_001479850  | -MAYS | EKVID  | HYENPRNVGS | F-DNEDP-SV | GSGMVGAPAC | GDVMKLOIKV |
| 1249634_Smarcescens@YP_007345780     | -MAYS | EKVID  | HYENPRNVGS | F-DNEDP-SV | GSGMVGAPAC | GDVMKLOIKV |
| 187410_Ypestis@NP_668657             | -MAYS | EKVID  | HYENPRNVGS | F-DSQDP-TI | GSGMVGAPAC | GDVMKLOIKV |
| 1157951_Pstuartii@YP_006215182       | -MAYS | EKVID  | HYENPRNVGS | F-DNNDP-SV | GSGMVGAPAC | GDVMKLOIKV |
| 344609_Sboydii@YP_001881320          | -MAYS | EKVID  | HYENPRNVGS | F-DNNDE-NV | GSGMVGAPAC | GDVMKLOIKV |
| 104623_Ssp@YP_008524031              | -MAYS | EKVID  | HYENPRNVGS | F-DNADP-NI | GSGMVGAPAC | GDVMKLOIKV |
| 561229_Dzeae@YP_003003456            | -MAYS | EKVID  | HYENPRNVGS | F-DSSDP-SI | GSGMVGAPAC | GDVMKLOIKV |
| 590409_Ddadantii@YP_003334610        | -MAYS | EKVID  | HYENPRNVGS | F-DSSDP-SI | GSGMVGAPAC | GDVMKLOIKV |
| 561230_Pcaratovorum@YP_003018589     | -MAYS | EKVID  | HYENPRNVGS | F-DNADP-SI | GSGMVGAPAC | GDVMKLOIKV |
| 561231_Pwasabiae@YP_003258666        | -MAYS | EKVID  | HYENPRNVGS | F-DNADP-SI | GSGMVGAPAC | GDVMKLOIKV |
| 1166016_Psp@YP_006282128             | -MAYS | EKVID  | HYENPRNVGS | F-DNADP-SI | GSGMVGAPAC | GDVMKLOIKV |
| 218491_Patrosepticum@YP_051325       | -MAYS | EKVID  | HYENPRNVGS | F-DNADP-SI | GSGMVGAPAC | GDVMKLOIKV |
| 99287_Senterica@NP_461477            | -MAYS | EKVID  | HYENPRNVGS | F-DNNDD-NV | GSGMVGAPAC | GDVMKLOIKV |
| 218493_Sbongori@YP_004731144         | -MAYS | EKVID  | HYENPRNVGS | F-DNNDD-NV | GSGMVGAPAC | GDVMKLOIKV |
| 290339_Csakazakii@YP_001436836       | -MAYS | EKVID  | HYENPRNVGS | F-DNNDD-NV | GSGMVGAPAC | GDVMKLOIKV |
| 693216_Cturicensis@YP_003211492      | -MAYS | EKVID  | HYENPRNVGS | F-DNNDD-NV | GSGMVGAPAC | GDVMKLOIKV |
| 399742_Esp@YP_001177741              | -MAYS | EKVID  | HYENPRNVGS | F-DNSDE-SV | GSGMVGAPAC | GDVMKLOIKV |
| 640513_Easburiae@YP_004829762        | -MAYS | EKVID  | HYENPRNVGS | F-DNSDE-SV | GSGMVGAPAC | GDVMKLOIKV |
| 693444_Ebacterium@YP_007339349       | -MAYS | EKVID  | HYENPRNVGS | F-DNSDE-SV | GSGMVGAPAC | GDVMKLOIKV |
| 290338_Ckoseri@YP_001451852          | -MAYS | EKVID  | HYENPRNVGS | F-DNSDE-NV | GSGMVGAPAC | GDVMKLOIKV |
| 484021_Kpneumoniae@YP_002920722      | -MAYS | EKVID  | HYENPRNVGS | F-DNSDE-NV | GSGMVGAPAC | GDVMKLOIKV |
| 637910_Crodentium@YP_003366009       | -MAYS | EKVID  | HYENPRNVGS | F-DNSDE-NV | GSGMVGAPAC | GDVMKLOIKV |
| 640131_Kvariicola@YP_003438138       | -MAYS | EKVID  | HYENPRNVGS | F-DNSDE-NV | GSGMVGAPAC | GDVMKLOIKV |
| 1191061_Koxytoca@YP_006500071        | -MAYS | EKVID  | HYENPRNVGS | F-DNSDE-NV | GSGMVGAPAC | GDVMKLOIKV |
| 1286170_Rornithinolytic@YP_007872306 | -MAYS | EKVID  | HYENPRNVGS | F-DNSDD-SV | GSGMVGAPAC | GDVMKLOIKV |
| 511145_Ecoli@NP_417024               | -MAYS | EKVID  | HYENPRNVGS | F-DNNDE-NV | GSGMVGAPAC | GDVMKLOIKV |
| 585054_Efergusonii@YP_002381825      | -MAYS | EKVID  | HYENPRNVGS | F-DNNDE-NV | GSGMVGAPAC | GDVMKLOIKV |
| 198214_Sflexneri@NP_708368           | -MAYS | EKVID  | HYENPRNVGS | F-DNNDE-NV | GSGMVGAPAC | GDVMKLOIKV |
| 216599_Ssonnei@YP_005457544          | -MAYS | EKVID  | HYENPRNVGS | F-DNNDE-NV | GSGMVGAPAC | GDVMKLOIKV |
| 300267_Sdysenteriae@YP_404261        | -MAYS | EKVID  | HYENPRNVGS | F-DNNDE-NV | GSGMVGAPAC | GDVMKLOIKV |
| 716541_Ecloacae@YP_003614361         | -MAYS | EKVID  | HYENPRNVGS | F-DNSDE-SV | GSGMVGAPAC | GDVMKLOIKV |
| 701347_Elignolyticus@YP_003940771    | -MAYS | EKVID  | HYENPRNVGS | F-DNSDE-NV | GSGMVGAPAC | GDVMKLOIKV |
| 630626_Sblattae@YP_006318650         | -MAYS | EKVID  | HYENPRNVGS | F-DNSDE-NV | GSGMVGAPAC | GDVMKLOIKV |
| 1028307_Eaerogenes@YP_004590373      | -MAYS | EKVID  | HYENPRNVGS | F-DNSDD-SV | GSGMVGAPAC | GDVMKLOIKV |
| 557723_Hparasuis@YP_002474707        | -MAYS | DKVID  | HYENPRNVGS | F-DKKAS-DI | GTGMVGAPAC | GDVMQLOIKV |
| 1005058_Ganatis@YP_004420698         | -MAYS | EKVID  | HYENPRNVGS | F-DKKDP-AV | GSGMVGAPAC | GDVMQLOIKV |
| 1075089_Pmoltocida@YP_005176279      | -MAYS | NKVID  | HYENPRNVGS | L-DKKDA-NV | GTGMVGAPAC | GDVMQLOIKV |
| 205914_Hsomnus@YP_718490             | -MAYS | EKLLD  | HYENPRNVGS | F-DKKDP-TV | GSGMVGAPAC | GDVMQLOIKV |
| 1171377_Btrehalosi@YP_007548422      | ----- | -----  | -----      | -----      | MVGAPAC    | GDILRLOIKV |
| 233412_Hducreyi@NP_873560            | -MAYS | DKVID  | HYENPRNVGT | F-DKEAT-DV | GTGMVGAPAC | GDILRLOIKV |
| 416269_Apleuropneumoni@YP_001053631  | -MAYS | EKVID  | HYENPRNVGT | F-DKEAA-DI | GTGMVGAPAC | GDILRLOIKV |
| 696748_Asuis@YP_006816777            | -MAYS | EKVID  | HYENPRNVGT | F-DKEAA-DI | GTGMVGAPAC | GDILRLOIKV |
| 1366053_Mhaemolytica@YP_008338465    | -MAYS | EKVID  | HYENPRNVGT | F-DKEAS-DI | GTGMVGAPAC | GDILRLOIKV |
| 1334187_Hinfluenzae@YP_008544790     | MAYS  | EKVID  | HYENPRNVGT | L-DKKDS-NV | GTGMVGAPAC | GDVMQLOIKV |
| 634176_Aaphrophilus@YP_003007650     | -MTYS | NKVID  | HYENPRNVGS | M-DKKDS-SV | GTGMVGAPAC | GDVMQLOIRV |
| 694569_Aactinomycetemc@YP_006286355  | ----- | -----  | -----      | M-DRKDS-AV | GTGMVGAPAC | GDVMQLOIRV |
| 862965_Hparainfluenzae@YP_004822800  | -MAYS | EKVID  | HYENPRNVGS | M-DKKDN-SV | GTGMVGAPAC | GDVMQLOIKV |
| 221988_Msucciniciprodu@YP_088916     | -MAYS | EKVID  | HYENPRNVGS | F-DKKSS-DV | GTGMVGAPAC | GDVMQLOIKV |
| 339671_Msuccinogenes@YP_001344170    | -MAYS | EKVID  | HYENPRNVGS | F-DKKAS-DV | GTGMVGAPAC | GDVMQLOIKV |
| 550540_Fbalearica@YP_003914035       | -MAYS | DKVID  | HYENPRNVGS | F-DKNDP-NV | ATGMVGAPAC | GDVMKLOLKI |
| 396595_Tsp@YP_003460082              | -MAYS | DKVID  | HYENPRNVGS | F-DKNDE-SV | GTGMVGAPAC | GDVMKLOIKV |
| 413404_CRuthia@YP_903798             | -MAY  | EKQVMD | HYENPRNVGV | L-DKDAK-NV | GTGMVGAPAC | GDVMRLOIOV |
| 412965_CVesicomysociu@YP_001219373   | -MAY  | GKQVMD | HYENPRNVGV | L-DKNAK-NV | GTGMVGAPAC | GDVMRLOIKI |
| 1208921_CKinetoplastiba@YP_007448562 | -MAYS | DKVLD  | HYENPRNVGS | F-SKDDE-SV | GTGMVGAPAC | GDVMKLOIKV |
| 561501_Baphidicola@YP_002468877      | -MAYS | KKVID  | HYENPRNVGS | F-SSTDL-NV | GSGLVGAPAC | GDVMKLOIKV |
| 357244_Otsutsugamushi@YP_001248706   | MAYS  | SEVIX  | YYEDRSNVGS | L-DETDK-SV | GTGLVGAPAC | GDVMKLOIKV |
| 1003201_Rtyphi@YP_005427548          | -MAYN | KKVID  | HYENPRNVGS | L-DKNKK-NV | GTGLVGAPAC | GDVMKLOIEV |
| 1105111_CRickettsia@YP_005365544     | -MAYS | KKVID  | HYENPRNVGS | L-DKENK-NV | GTGLVGAPAC | GDVMKLOIAV |
| 272944_Rconorii@NP_360366            | -MAYS | KKVID  | HYENPRNVGS | L-DKENK-NV | GTGLVGAPAC | GDVMKLOIAV |
| 452659_Rrickettsii@YP_001650107      | -MAYS | KKVID  | HYENPRNVGS | L-DKENK-NV | GTGLVGAPAC | GDVMKLOIAV |
| 347255_Rafricae@YP_002845312         | -MAYS | KKVID  | HYENPRNVGS | L-DKENK-NV | GTGLVGAPAC | GDVMKLOIAV |
| 562019_Rpeacockii@YP_002916645       | -MAYS | KKVID  | HYENPRNVGS | L-DKENK-NV | GTGLVGAPAC | GDVMKLOIAV |
| 1105113_Rrhipicephali@YP_005390607   | -MAYS | KKVID  | HYENPRNVGS | L-DKENK-NV | GTGLVGAPAC | GDVMKLOIAV |
| 416276_Rmassiliae@YP_001499486       | MAYS  | KKVID  | HYENPRNVGS | L-DKENK-NV | GTGLVGAPAC | GDVMKLOIAV |
| 1105108_Rparkeri@YP_005392983        | -MAYS | KKVID  | HYENPRNVGS | L-DKENK-NV | GTGLVGAPAC | GDVMKLOIAV |
| 1105114_Rmontanensis@YP_005391246    | -MAYS | KKVID  | HYENPRNVGS | L-DKENK-NV | GTGLVGAPAC | GDVMKLOIAV |
| 1032845_Rheilongjiangen@YP_004764467 | -MAYS | KKVID  | HYANPRNVGS | L-DKENK-NV | GTGLVGAPAC | GDVMKLOIAV |
| 652620_Rjaponica@YP_004884928        | -MAYS | KKVID  | HYANPRNVGS | L-DKENK-NV | GTGLVGAPAC | GDVMKLOIAV |
| 481009_Rphilipii@YP_005300823        | -MAYS | KKVID  | HYENPRNVGS | L-DKENK-NV | GTGLVGAPAC | GDVMKLOIAV |
| 1105109_Rslovaca@YP_005426472        | -MAYS | KKVID  | HYENPRNVGS | L-DKENK-NV | GTGLVGAPAC | GDVMKLOIAV |
| 1105107_Rcanadensis@YP_005299497     | -MAYS | KKVID  | HYENPRNVGS | L-NKESQ-NV | GTGLVGAPAC | GDVMKLOIEV |
| 336407_Rbellii@YP_538116             | -MAYS | KKVID  | HYENPRNVGS | L-DKEKK-NV | GTGLVGAPAC | GDVMKLOIEV |
| 315456_Rfelis@YP_246860              | -MAYS | KKVID  | HYENPRNVGS | L-DKEKK-NV | GTGLVGAPAC | GDVMKLOIEV |
| 293614_Rakari@YP_001493572           | -MAYS | TKVID  | HYENPRNVGS | L-DKEKK-NV | GTGLVGAPAC | GDVMKLOIEV |
| 1105110_Raustralis@YP_005414962      | -MAYS | KKVID  | HYENPRNVGS | L-DKEKK-NV | GTGLVGAPAC | GDVMKLOIEV |
| 434131_Nristicii@YP_003081518        | -MAYS | DSVLD  | HYNNPRNVGT | I-DKNKK-NV | GTGLVGAPAC | GDVMRLOIEV |
| 222891_Nsennetsu@YP_506192           | -MAYS | DSVLD  | HYNNPRNVGT | I-DKNKK-NV | GTGLVGAPAC | GDVMRLOIEV |
| 330214_CNitrospira@YP_003799619      | -MAYS | EKVVD  | HFNNPRNMGS | F-KKEED-GV | GTGIVGAPEC | GDVMKLOIKV |
| 984262_Sgrandis@YP_005322201         | -MAYS | EKLLD  | HFKNPRNVGT | L-DKNKN-TV | GTGLVGAPEC | GDVMRLOIEV |
| 100901_Wendosymbiont@YP_006555868    | -MSYN | KKILD  | HYENPRNVGS | L-DKNDP-NV | GTGLVGAPEC | GDVMKLOIKV |
| 66084_Wsp@YP_002727379               | -MSYN | EKILD  | HYENPRNVGS | L-DKNDP-NV | GTGLVGAPEC | GDVMKLOIKV |

|                                       |       |       |            |         |      |            |             |
|---------------------------------------|-------|-------|------------|---------|------|------------|-------------|
| 1423892_Emuris@YP_008929080           | -MSYS | ESLLE | YKPNKPNVGT | L-SKEDY | -NV  | GTGLVGAPSC | GDVMKLOIKV  |
| 574556_Acentrale@YP_003328545         | -MSYS | DAVLD | RCKNPQNVGS | L-PKDDL | -NV  | GTGLVGAPSC | GDVMKLOIKV  |
| 320483_Amarginal@YP_002563600         | YMSYS | DAVLD | RCKNPQNVGS | L-PKDDL | -NV  | GTGLVGAPSC | GDVMKLOIKV  |
| 1184253_Aphagocytophilum@YP_008332775 | -MSYS | DAVLN | RCKAPQNVGS | L-PKDDI | -SV  | GTGLVGAPSC | GDVMKLOIRV  |
| 205920_Echaffeensis@YP_507440         | -MSYS | ESLLE | HYKNPKNVGT | L-PKEDY | -NV  | GTGLVGAPSC | GDVMKLOIKV  |
| 254945_Eruminantium@YP_180281         | -MSYS | ESLLE | HYKNPKNVGT | L-PKEDY | -NV  | GTGLVGAPSC | GDVMKLOIKV  |
| 254945_Eruminantium@YP_197308         | -MSYS | ESLLE | HYKNPKNVGT | L-PKEDY | -NV  | GTGLVGAPSC | GDVMKLOIKV  |
| 269484_Ecanis@YP_303050               | -MSYS | EVLLS | HYKNPKNVGT | L-PKDDY | -NV  | GTGLVGAPSC | GDVMKLOIKV  |
| 517418_Cthalassium@YP_001997584       | -MAYS | DKVMD | HYNNPRNVGS | L-DQKDE | -QV  | GTGVVGAPEC | GDVMKLOIKV  |
| 485917_Pheparinus@YP_003091837        | -MAYS | EKVII | HYTNPRNVGT | L-NKDSK | -SV  | GTGLVGAPEC | GDVMRLOIEV  |
| 762903_Psaltans@YP_004273747          | -MAYS | DKVID | HYSNPRNVGT | L-DKSKQ | -NV  | GTGLVGAPEC | GDVMRLOIEV  |
| 929556_Scanadensis@YP_006255074       | -MAYS | EKVID | HYTHPRNVGT | L-DKAKQ | -NV  | GTGLVGAPEC | GDVMRLOIEV  |
| 760192_Hhydrossis@YP_004446110        | -MAYS | DKVLE | HFQNPQNVGT | L-DKSKP | -TV  | GTGLVGAPEC | GDVMRLOIEV  |
| 1162668_Lferrooxidans@YP_005469656    | -MAYS | DKVID | HYNNPRNMGS | F-DKSDS | -NV  | GTGIVGAPEC | GDVMKLOLKI  |
| 1048260_Lferriphilum@YP_006765680     | -MAYS | DKVVD | HYNNPRNMGS | F-DKSEE | -NV  | GTGIVGAPEC | GDVMKLOLKI  |
| 240015_Acapsulatum@YP_002755573       | -MAYS | DKVID | HYNNPRNVGS | L-DKSSE | -AV  | GTGLVGAPEC | GDVMRLOIRV  |
| 204669_Ckoribacter@YP_589562          | -MAYS | EKVLD | HYSNPRNVGS | M-DKNSA | -EV  | GTGLVGAPEC | GDVMKLOIKV  |
| 1198114_Gtundricola@YP_004219465      | -MAYS | DKVVD | HYSNPRNVGS | M-DKSLD | -EV  | GTGLVGAPEC | GDVMRLOIRV  |
| 926566_Troseus@YP_006423699           | -MAYS | DKVVD | HYENPRNVGT | L-DKSSS | -EV  | GTGLVGAPEC | GDVMRLOIKV  |
| 401053_Tsaanensis@YP_04180969         | -MAYS | DKVVD | HYENPRNVGT | L-DKAST | -EV  | GTGLVGAPEC | GDVMRLOIKV  |
| 682795_Gmallensis@YP_005055878        | -MAYS | DKVVD | HYENPRNVGT | L-DKSSS | -EV  | GTGLVGAPEC | GDVMRLOIKV  |
| 696127_Cmidichloria@YP_004679282      | -MAYS | KKVID | HYENPQNVGS | F-AKDEE | -NV  | GTGLVGAPSC | GDVMKLOIKV  |
| 871271_Czindieria@YP_003878048        | MTFYS | KKLIK | YCEKPKNIGS | F-LKNNR | -KI  | GTGITGSPSC | GDVMKLOIKI  |
| 657324_Bfibrisolvens@YP_007819038     | MALYS | EKVID | HYNNPRNVGT | I-ENAD  | ---- | GVGEVGNPVC | GDIMKIYLKI  |
| 768670_Cnitroreducens@YP_004051749    | KGPYS | DKVMD | HFNNPRNMGE | I-EDAN  | ---- | GVGEVGNPAC | GDVMKLOFKI  |
| 717231_Fsinusarabici@YP_004603876     | KGPYS | EKVME | HFNNPRNMGE | I-EDAS  | ---- | GVGEVGNPAC | GDVMKLOFLKI |
| 639282_Ddesulfuricans@YP_003496772    | KGPYS | EKVMD | HFNNPRNMGE | I-EDAN  | ---- | AVGEVGNPAC | GDVMKLYMKI  |
| 522772_Dacetiphilus@YP_003503972      | KGPYS | EKVMD | HFNNPRNMGE | I-EDAN  | ---- | GIGEVGNPAC | GDVMKLOFLKI |
| 693746_Ovalericigenes@YP_004880314    | -MLYS | EKVMD | HFQNPQNVGT | M-DDAD  | ---- | GVGEVGNAC  | GDIMRMYIKV  |
| 657321_Rbromii@YP_007781362           | -MAYS | EKVMD | HFANPRNVGE | I-ENAD  | ---- | GIGEVGNPAC | GDIMRMYIKV  |
| 657322_Fprausnitzii@YP_007799942      | ASMYS | AKVME | HFANPNVGE  | L-PDAN  | ---- | GVGEVGNPKC | GDIMRMYIKI  |
| 213810_Rchampanellensis@YP_007828576  | -MLYS | EKVMD | HFANPRNVGE | I-PDAD  | ---- | GVGEVGNAC  | GDIMKMYIKV  |
| 657319_[siraeum@YP_007775950          | -MIYS | EKVMD | HYANPRNVGE | I-EDAN  | ---- | GVGEVGNAC  | GDIMKMYLKI  |
| 293826_Ametalliredigen@YP_001320267   | --MYS | EKVMD | HFANPRNVGE | I-ENAD  | ---- | GVGEVGNPKC | GDIMKMYLKI  |
| 350688_Aoremlandii@YP_001513205       | --MYS | EKVMD | HFANPRNVGE | I-EKAC  | ---- | AVGEVGNAC  | GDIMKMYLKI  |
| 546269_Falocis@YP_005054244           | -MLY  | TEKVM | HFNNPRNVGE | I-PDAD  | ---- | GIGEVGNAC  | GDIMRMYLKI  |
| 1511_[sticklandii@YP_003936518        | ----- | MD    | HFANPRNVGE | I-EGAD  | ---- | GVGEVGNAC  | GDIMKIYLVK  |
| 699034_Pdifficile@YP_006198328        | -MOYS | DKVME | HFNNPRNMGE | I-DNAS  | ---- | GVGEVGNPAC | GDIMKIFLDI  |
| 1128398_[acidurici@YP_006788189       | -MYS  | EKVME | HFNNPRNVGE | I-ODAD  | ---- | GIGEVGNAC  | GDIMKMYLKI  |
| 572544_Ipolytropus@YP_003967871       | -MOYS | EKVMD | HFNNPRNVGT | I-ENPD  | ---- | GVGEVGNPAC | GDIMKIFLDI  |
| 469604_Fnucleatum@YP_008477745        | -MOYT | EKVMD | HFNNPNVGT  | I-ENPD  | ---- | GVGEVGNPAC | GDIMEIFIKV  |
| 580340_Tlienii@YP_004932350           | --MYS | EKVME | LFMHPKNAGK | I-EDAD  | ---- | GIGEVGNPAC | GDIMKIYIKV  |
| 891968_Amobile@YP_006444325           | --MYT | EKVME | LFMHPKNVGR | I-EDAD  | ---- | GIGEVGNPVC | GDVMKIYLKI  |
| 525903_Tacidaminovorans@YP_003316727  | -MAYS | EKVVQ | YFMNPVNVGE | L-PDED  | ---- | GVGEVGNPKC | GDVMKIYLRV  |
| 697281_Maustraliensis@YP_004463371    | --MYS | QKVM  | HFANPRNVGE | I-PDAD  | ---- | GVGEVGNPAC | GDIMKIFIKV  |
| 309799_Dthermophilum@YP_002251521     | --MYS | EKVL  | HFNNPRNVGE | I-ENAD  | ---- | GVGEVGNPAC | GDVMKMYLKI  |
| 368407_Mmarisnigri@YP_001047821       | --MYT | EKVII | EFNPNVGE   | L-ADAD  | ---- | AVGEAGSPTC | GDIMKIYLVK  |
| 903814_Elimosum@YP_003961665          | MMEYT | DKVME | YKPNKPNVGT | M-EDAN  | ---- | GIGEVGNPAC | GDIMKMYLKI  |
| 931626_Awoodii@YP_005268656           | -MEYT | DVME  | NFTCPKHVGE | L-EDAN  | ---- | GIGEVGNPAC | GDIMKIFLDI  |
| 410358_Mlabreanus@YP_001029708        | --MYS | EKVMD | HFANPRNVGM | I-EDPS  | ---- | GVGEVGNPAC | GDIMKMYLKI  |
| 679926_Mpetreolarius@YP_003895855     | --MYS | DKVMD | HFANPRNVGT | I-EDAD  | ---- | GIGEVGNPAC | GDIMKIYIKV  |
| 86416_Cpasteurianum@YP_007940944      | -MYS  | EKVMD | HFANPRNVGT | I-ENAN  | ---- | GVGEVGNPAC | GDIMKIYIKV  |
| 929506_Cbotulinum@YP_004396224        | --MYS | EKVMD | HFANPRNVGT | I-ENPS  | ---- | GVGEVGNPAC | GDIMKIYLEV  |
| 386415_Cnovyi@YP_878355               | --MYS | EKVMD | HFANPRNVGT | I-ENPS  | ---- | GVGEVGNPAC | GDIMKIYLDV  |
| 748727_Clungdahlii@YP_003779382       | -MYS  | EKVMD | HFANPRNVGT | I-PDAN  | ---- | GVGEVGNPAC | GDIMKIYIKV  |
| 1341692_Cautoethanogenu@YP_008700753  | -MYS  | EKVMD | HFANPRNVGT | I-PDAN  | ---- | GVGEVGNPAC | GDIMKIYIKV  |
| 747365_Tnarugense@YP_004437867        | --MYS | EKVMD | HFANPRNVGT | I-SDAD  | ---- | GIGEVGNPAC | GDIMKVIYIKV |
| 651822_Ffastidiosum@YP_007827223      | ALDYS | QKVM  | HFANPRNVGT | L-KDAD  | ---- | GVGEAGNPRC | GDIMKIYLVK  |
| 572547_Catolombiensis@YP_003553035    | -MLYS | EIVMD | HFANPRNVGT | I-KDAD  | ---- | GVGEAGNPRC | GDIMKIYIKV  |
| 212717_Acetani@NP_781697              | MMEYS | DKVME | HFANPRNVGT | I-SDAN  | ---- | GVGEVGNPKC | GDIMKIYLVK  |
| 431943_Ckluyveri@YP_001394709         | -MYS  | EKVMD | HFANPRNVGT | I-PDAN  | ---- | GVGEVGNPKC | GDIMKMYIKV  |
| 573061_Ccellulovorans@YP_003843335    | -MEYS | EKVME | HFANPRNVGT | I-ESAD  | ---- | GIGEVGNPKC | GDIMKIYLVK  |
| 508767_Cbotulinum@YP_001920515        | -MIYT | DKVMD | HFANPRNVGT | I-EDAN  | ---- | GVGEVGNAC  | GDIMKIYLVK  |
| 931276_Csaccharoperbut@YP_007454264   | -MIYS | EKVME | HFANPRNVGT | I-ENAN  | ---- | GVGEVGNAC  | GDIMKIYLVK  |
| 290402_Cbeijerinckii@YP_001308237     | -MIYS | EKVME | HFANPRNVGT | I-V DAN | ---- | GVGEVGNAC  | GDIMKIYLVK  |
| 1345695_Csaccharobutyli@YP_008674363  | -MIYS | EKVME | HFANPRNVGT | I-PDAN  | ---- | GVGEVGNAC  | GDIMKIYLVK  |
| 269797_Mbarkeri@YP_305925             | -MDYS | LKVM  | HFANPRNMGS | I-ENSD  | ---- | GVGEVGNAC  | GDIMKIYLVK  |
| 188937_Macetivorans@NP_617616         | -MDYS | AKVLD | HFANPRNMGS | I-ANCD  | ---- | GVGEVGNAC  | GDIMKIFLDI  |
| 195103_Cperfringens@YP_696469         | -MIYS | EKVMD | HFANPRNVGT | I-KDAN  | ---- | GIGEVGNAC  | GDIMKIYLKI  |
| 593750_Mformicica@YP_007249963        | --MYS | DKVMD | HFANPRNVGT | I-ENPD  | ---- | GVGEVGNPVC | GDIMKIYLKI  |
| 456442_Mboonei@YP_001405283           | --MYS | EIVMD | HFANPRNVGT | I-ENPD  | ---- | GVGEVGNPVC | GDIMKIFLDI  |
| 521011_Mpalustris@YP_002466865        | --MYS | EKVMD | HFANPRNVGT | I-EDAD  | ---- | GIGEVGNPKC | GDIMKIYLKI  |
| 323259_Mhungatei@YP_503638            | --MYS | EKVMD | HFANPRNVGT | I-PDAD  | ---- | GVGEVGNPAC | GDIMRIFLTV  |
| 547558_Mmahii@YP_003541558            | -MYS  | EKVME | HFANPNVGE  | M-EDAD  | ---- | GVGEVGNPAC | GDIMKIYLKI  |
| 644295_Mevestigatum@YP_003727500      | MAMYS | KKVMD | HFANPRNVGT | M-ENPD  | ---- | GVGEVGNPKC | GDIMRMYLKI  |
| 351627_Csaccharolyticum@YP_001181022  | --MYS | EKVL  | HFANPRNVGT | I-EDAD  | ---- | GVGEVGNPKC | GDIMKMYLKI  |
| 521460_Cbescii@YP_002573580           | --MYS | EKVL  | HFANPRNVGT | I-ENAD  | ---- | GVGEVGNPKC | GDIMKMYLKI  |
| 632292_Chydrothermalis@YP_003992133   | --MYS | EKVL  | HFANPRNVGT | I-ENAD  | ---- | GVGEVGNPKC | GDIMKMYLKI  |
| 632348_Ckronotskyensis@YP_004023692   | --MYS | EKVL  | HFANPRNVGT | I-ENAD  | ---- | GVGEVGNPKC | GDIMKMYLKI  |
| 632335_Ckristjanssonii@YP_004026829   | --MYS | EKVL  | HFANPRNVGT | I-ENAD  | ---- | GVGEVGNPKC | GDIMKMYLKI  |
| 632516_Clactoaceticus@YP_004798736    | --MYS | EKVL  | HFANPRNVGT | I-ENAD  | ---- | GVGEVGNPKC | GDIMKMYLKI  |
| 608506_Cobsidiansis@YP_003840166      | --MYS | EKVL  | HFANPRNVGT | I-ENAD  | ---- | GVGEVGNPKC | GDIMKVIYLKI |
| 632518_Cowensensis@YP_004002802       | --MYS | EKVL  | HFANPRNVGT | I-ENAD  | ---- | GVGEVGNPKC | GDIMKMYLKI  |
| 1121335_[stercorarium@YP_007372524    | -MYS  | EKVMD | HFANPRNVGT | I-EDAD  | ---- | GVGEVGNPKC | GDIMKMYLKI  |
| 1121335_[stercorarium@YP_007678972    | -MYS  | EKVMD | HFANPRNVGT | I-EDAD  | ---- | GVGEVGNPKC | GDIMKMYLKI  |
| 755731_Csp@YP_005148252               | --MYS | EKVMD | HFANPRNVGT | I-EDAN  | ---- | GVGEVGNPKC | GDIMKMYLKI  |
| 394503_Ccellulolyticum@YP_002506259   | --MYS | EKVMD | HFANPRNVGT | I-EDAN  | ---- | GVGEVGNPKC | GDIMKMYLKI  |
| 720554_[clariflavum@YP_005046370      | --MYS | EKVMD | HFANPRNVGT | I-ENAD  | ---- | GVGEVGNAC  | GDIMKIYLKI  |



|                                      |            |            |            |            |            |             |
|--------------------------------------|------------|------------|------------|------------|------------|-------------|
| 203119_Rthermocellum@YP_001037149    | -MMSYSEKVM | HFVNPRNVGE | I-ENAD---- | GVGEVGNAC  | GDIMKMYLKI |             |
| 642492_Clentocellum@YP_004309737     | --MYSEKVM  | HFVNPRNVGE | I-ENAS---- | GVGTVGNAC  | GDIMKVYLQI |             |
| 1384484_Aequolifaciens@YP_008663926  | AMNYS      | DKVME      | HFVNPRNVGE | I-ENAS---- | GCGTVGNAC  | GDIMRVYLDI  |
| 515619_Erectale@YP_002936246         | --MAYSEKVM | HFVNPRNVGE | M-ENPS---- | GVGTVGNAC  | GDIMRMYLDI |             |
| 718255_Rintestinalis@YP_007780168    | --MYSEKVM  | HFVNPRNVGE | M-ENPS---- | GVGTVGNAC  | GDIMRMYLDI |             |
| 657315_Rintestinalis@YP_007830593    | --MYSEKVM  | HFVNPRNVGE | M-ENPS---- | GVGTVGNAC  | GDIMRMYLDI |             |
| 357809_Lphytoferlytan@YP_001560003   | --MYTEKVM  | HFQHPNVGE  | L-ENAS---- | GVGTVGNAC  | GDIMRMYLDI |             |
| 610130_[saccharolyticu@YP_003823446  | --MYTEKVM  | HFQHPNVGE  | I-DNPS---- | GMGTVGNAC  | GDIMRIYLDI |             |
| 717608_[cf@YP_007849106              | --MYSEKVM  | HFQHPNVGE  | I-ENPS---- | GMGTVGNAC  | GDIMRIYLDI |             |
| 245012_bproducing@YP_007810477       | --MYSEKVM  | HFQHPNVGE  | I-ENPS---- | GMGTVGNAC  | GDIMRIYLDI |             |
| 657313_Rtorques@YP_007786815         | --MYTEKVM  | HFQHPNVGE  | I-ENAS---- | GVGTVGNAC  | GDIMRIYLDI |             |
| 245018_bproducing@YP_007788847       | --MYSEKVM  | HFQHPNVGE  | I-ENAS---- | GVGTVGNAC  | GDIMRIYLDI |             |
| 585394_Rhominis@YP_004837975         | --MYSEKVM  | HFQHPNVGE  | I-EDAS---- | GVGTVGNAC  | GDIMRMYLDI |             |
| 1054217_Tarchaeon@YP_007688600       | DGVYS      | DKVVD      | HFVNPRNVGE | I-ENAS---- | GVGTVGNAC  | GDIMRIFLDI  |
| 657323_Rsp@YP_007784833              | --MYSEKVM  | HFQHPNVGE  | I-ENAS---- | GVGTVGNAC  | GDIMRIFLDI |             |
| 657314_Robeum@YP_007804234           | --MYSEKVM  | HFQHPNVGE  | I-EDAS---- | GVGTVGNAC  | GDIMRMFLDI |             |
| 717962_Ccatus@YP_007770008           | --MYSEKVM  | HFQHPNVGE  | I-ENAS---- | GVGTVGNAC  | GDIMRIYFDI |             |
| 552811_Dlykanthroporep@YP_003758020  | PASYS      | EQVIE      | HFVNPRNVGE | L-ENPD---- | GVGRVGNPVC | GDVMEIYIKV  |
| 246194_Chydrogenofoma@YP_361011      | -MMSYSEKVM | HFVNPRNVGE | I-PDAD---- | GVGEVGNPSC | GDIMRIYIKV |             |
| 696281_Druminis@YP_004546667         | --MYSEKVM  | HFQHPNVGE  | I-ENAD---- | GVGTVGNPSC | GDIMKISLKI |             |
| 868595_Dcarboxydivoran@YP_004497987  | --MYSEKVM  | HFVNPRNVGE | I-ENPD---- | GVGOVGNPSC | GDIMKISLKI |             |
| 349161_Dreducens@YP_001112128        | --MYTEKVM  | HFVNPRNVGE | I-ENAD---- | GIGOVGNPSC | GDIMKISLKI |             |
| 634498_Mruminantium@YP_003424309     | --MYS      | DKVME      | HFVNPRNVGE | I-ENAS---- | GEGTVGNPVC | GDLMTIYIDV  |
| 406327_Wmannielii@YP_001322697       | --MYSEKVM  | HFVNPRNVGE | I-ENPS---- | GVGTVGNPSC | GDLMTIYIYV |             |
| 679901_Mzhilinae@YP_004616912        | --MYS      | KKVMD      | HFVNPRNVGE | I-EDAD---- | GVGEVGNPAC | GDMMTIYIKV  |
| 224719_Msp@YP_008075510              | MEEYT      | DKVLD      | HFVNPRNVGE | I-EDAS---- | GEATVGNPVC | GDLMTIYIDV  |
| 339860_Mstadthanae@YP_448034         | -MOYS      | DKVVD      | HYTNPRNTGV | I-KNPD---- | GEGTVGNPVC | GDIMTIYIKV  |
| 1295009_CMethanomassili@YP_008071572 | -MOY       | GPEVM      | NIANPRNSGV | M-KDAD---- | GVGOVGNPEC | DDVTIYIYIKV |
| 420247_Msmithii@YP_001272836         | --MYSEKVM  | HFVNPRNVGE | M-ENPD---- | GVGTVGNPVC | GDLMTIYIKV |             |
| 1041930_Mconradii@YP_005380864       | -MMSY      | PKVMQ      | HFVNPRNVGE | I-SDAD---- | GVGEVGNPVC | GDMMTIYIKV  |
| 304371_Mpaludicola@YP_003355464      | -MMSY      | PKVMQ      | HFVNPRNVGE | I-PDAD---- | GVGEVGNPVC | GDLMTIYIKV  |
| 1379702_Msp@YP_008915990             | --MYSEKVM  | HFVNPRNVGE | I-EDAS---- | GVGTVGNPVC | GDLMTIYIKV |             |
| 351160_Marvoryzae@YP_686139          | --MYS      | PKVMT      | HFVNPRNVGE | I-PDAD---- | GVGTVGNPVC | GDMMTIYIKV  |
| 990316_Mconcilii@YP_004384883        | QIGY       | NETVMD     | HFVNPRNVGE | I-ENPD---- | GVGTVGNPVC | GDLMEIYIKV  |
| 521011_Mpalustris@YP_002466708       | QIGY       | TEKVM      | HFVNPRNVGE | V-ADPD---- | GVGOVGNPVC | GDLMEIYIKV  |
| 1201294_Mbourgensis@YP_006544991     | QIGYS      | QKVM       | HFVNPRNVGE | I-ENPD---- | GVGTVGNPVC | GDLMEIYIKV  |
| 368407_Mmarisnigri@YP_001048051      | QIGYS      | QKVM       | HFVNPRNVGE | I-ENPD---- | GVGTVGNPVC | GDLMEIYIKV  |
| 635013_Tpotens@YP_003640662          | --MYNEKVM  | HFVNPRNVGE | I-EEAS---- | GIGEVGNPVC | GDIMRISIKV |             |
| 457570_Nthermophilus@YP_001916489    | --MYNEKVM  | HFQHPNVGE  | V-ESPD---- | GVGEVGNPVC | GDIMRISIKV |             |
| 574087_Aarabaticum@YP_003827335      | --MYS      | DKVMD      | HFVNPRNVGE | I-EDAD---- | GVGEVGNPVC | GDIMKMYIKV  |
| 748449_Hhalobius@YP_007315822        | MKDYS      | DEVMD      | HFVNPRNVGE | I-EEAD---- | GVGOVGNPVC | GDIMKMYIKV  |
| 338963_Pcarbinolicus@YP_006717600    | --MYS      | DKVID      | HFVNPRNVGE | I-ENAD---- | GVGEVGNPVC | GDIMKMYIKV  |
| 498761_Hmodesticaldum@YP_001680434   | --MYTEKVM  | HFVNPRNVGE | I-ENAS---- | GVGEVGNAC  | GDIMRIYLDI |             |
| 768704_Dmeridiei@YP_006620851        | --MYTEKVM  | HFVNPRNVGE | L-ENAD---- | GVGEVGNAC  | GDIMRIYLDI |             |
| 768706_Dorientis@YP_004969159        | --MYTEKVM  | HFVNPRNVGE | I-DNAD---- | GVGEVGNAC  | GDIMRIYLDI |             |
| 1147129_Dsp@YP_006909410             | --MYSEKVM  | HFVNPRNVGE | I-ENAN---- | GVGOVGNAC  | GDIMRISMVV |             |
| 138119_Dhafniense@YP_518658          | SDMYT      | EKVM       | HFVNPRNVGE | I-EDAN---- | GVGEVGNAC  | GDIMRIYLDI  |
| 645991_Sglycolicus@YP_004266248      | --MYS      | DKVLD      | HFVNPRNVGE | L-ENAN---- | GVGTVGNAC  | GDIMQIFLDI  |
| 646529_Dacidiphilus@YP_006467680     | --MYTEKVM  | HFVNPRNVGE | I-ENAD---- | GVGEVGNAC  | GDIMRIYLDI |             |
| 272564_Dhafniense@YP_002460033       | --MYTEKVM  | HFVNPRNVGE | I-EDAN---- | GVGEVGNAC  | GDIMRIYLDI |             |
| 756499_Ddehalogenans@YP_006431093    | --MYTEKVM  | HFVNPRNVGE | I-ENPD---- | GVGEVGNAC  | GDIMRIYLDI |             |
| 871963_Ddichloroelimin@YP_007221311  | --MYSEKVM  | HFVNPRNVGE | I-ENAD---- | GVGEVGNAC  | GDIMRIYLDI |             |
| 767817_Dgibsoniae@YP_007945765       | --MYTEKVM  | HFVNPRNVGE | I-SDAN---- | GVGOVGNPVC | GDIMKIYIKV |             |
| 485916_Dacetoxidans@YP_003191710     | --MYSEKVM  | HFVNPRNVGE | I-ENAN---- | GIGOVGNPVC | GDIMKIYIKV |             |
| 555079_Toceani@YP_003825515          | --MYNEKVM  | HFVNPRNVGE | I-PDAD---- | GIGEVGNPVC | GDMMTIYIKV |             |
| 349307_Mthermophila@YP_843171        | QIGYS      | KKVME      | HFVNPRNVGE | I-DDPD---- | GVGTVGNPVC | GDLMEIYIKV  |
| 760568_Dkuznetsovii@YP_004517387     | --MYS      | EKVM       | HFVNPRNVGE | I-PDAD---- | GVGOVGNPVC | GDIMKIYIKV  |
| 373903_Horeni@YP_002508640           | --MYSEKVM  | HFVNPRNVGE | I-KDAD---- | AVGEVGNPVC | GDIMKIYIKV |             |
| 370438_Pthermopropioni@YP_001211605  | --MYS      | EKVM       | HFVNPRNVGE | I-PDAD---- | GVGEVGNPVC | GDIMKIYIKV  |
| 264732_Mthermoacetica@YP_430496      | --MYSEKVM  | HFVNPRNVGE | I-ENAD---- | GVGOVGNPVC | GDIMRIYIKV |             |
| 96561_Doleovorans@YP_001528642       | -MIYS      | KTVM       | HFVNPRNVGE | I-ENAA---- | GVGEVGNPVC | GDMMTIYLDI  |
| 471821_uTermite@YP_001956213         | MAFYS      | ERVMD      | HFVNPRNVGE | I-KDAD---- | GIGEVGNPVC | GDMMTIYIKV  |
| 429009_Adegensii@YP_003238425        | --MYS      | AKVME      | HFVNPRNVGE | I-EDAD---- | GVGEVGNPVC | GDVMTIYIKV  |
| 706587_Dtiedjei@YP_006449617         | --MYS      | DKVMD      | HFVNPRNVGE | I-PDAD---- | GVGEVGNPVC | GDVMTIYIKV  |
| 589924_Fplacidus@YP_003435557        | --MYS      | EKVM       | HFVNPRNVGE | I-EDAD---- | GVGTVGNPVC | GDMMTIYIKV  |
| 224325_Afulgidus@NP_069024           | --MYS      | DKVMD      | HFQHPNVGE  | I-EDAD---- | GVGTVGNPVC | GDLMTIYIKV  |
| 224325_Afulgidus@NP_069399           | --MYS      | DKVMD      | HFQHPNVGE  | I-EDAD---- | GVGTVGNPVC | GDLMTIYIKV  |
| 416591_Tlettingae@YP_001470347       | MLKY       | TELVD      | HFVNPRNVGE | I-ENAD---- | AEATEGS    | GDIMTIYIKV  |
| 688269_Tthermarum@YP_004660083       | MLKY       | TELVD      | HFVNPRNVGE | M-EDAD---- | VTATEGS    | GDIMTIYIKV  |
| 374847_CKorarchaeum@YP_001737319     | PLPY       | TPRVLE     | LFVNPRNVGE | I-DDAD---- | AFVAGS     | GDVMTIYIKV  |
| 583356_Iaggregans@YP_003860035       | PLPYS      | PKVLE      | IFVNPRNVGE | L-ENAT---- | VVESAGS    | GDVMTIYIKV  |
| 272947_Prowazekii@NP_220862          | -MAYS      | SKVID      | HYENPRNVGS | L-DKDKK-NV | GTGLVGNPVC | GDVMTIYIKV  |
| 1282356_Ppoe@YP_007398800            | -MAYS      | EKVID      | HYENPRNVGS | M-NAEDP-DV | GTGLVGNPVC | GDVMTIYIKV  |
| 994484_Pbrassicacearum@YP_004352099  | -MAYS      | EKVID      | HYENPRNVGS | M-DAQDP-DV | GTGLVGNPVC | GDVMTIYIKV  |
| 882944_Languillarum@YP_008488748     | -MAYS      | EKVID      | HYENPRNVGS | F-DKEDP-TI | GTGLVGNPVC | GDVMTIYIKV  |
| 1167634_Axylosoxidans@YP_008032542   | -MAYS      | SKVLD      | HYENPRNVGS | F-DKSDS-SV | GTGLVGNPVC | GDVMTIYIKV  |
| 257311_Bparapertussis@NP_884287      | -MAYS      | SKVLD      | HYENPRNVGS | F-DKSDS-SV | GTGLVGNPVC | GDVMTIYIKV  |
| 1017264_Bpertussis@YP_005589900      | -MAYS      | SKVLD      | HYENPRNVGS | F-DKSDS-SV | GTGLVGNPVC | GDVMTIYIKV  |
| 284812_Spome@NP_592967               | RRMYH      | KNVLD      | HYENPRNVGS | L-PKGDV-DV | GIGLVGNPVC | GDVMTIYIKV  |
| 559292_Scerevisiae@NP_014869         | KRLYH      | PKVID      | HYENPRNVGS | M-DKSLA-NV | GTGLVGNPVC | GDVMTIYIKV  |
| 559292_Scerevisiae@NP_015190         | KRLYH      | PKVIE      | HYENPRNVGS | L-DKSLA-NV | GTGLVGNPVC | GDVMTIYIKV  |
| 9606_Hsapiens@NP_998760              | ARLYH      | KKVVD      | HYENPRNVGS | L-DKTSK-NV | GTGLVGNPVC | GDVMTIYIKV  |
| 9606_Hsapiens@NP_055116              | SVDL       | STQVVD     | HYENPRNVGS | L-DKTSK-NV | GTGLVGNPVC | GDVMTIYIKV  |
| 3702_Athaliana@NP_193953             | LRTYH      | ENVID      | HYENPRNVGS | F-DKNDP-NV | GTGLVGNPVC | GDVMTIYIKV  |
| 3702_Athaliana@NP_192317             | SRLYH      | PNVID      | HYENPRNVGS | F-DKNDP-NV | GTGLVGNPVC | GDVMTIYIKV  |
| 3702_Athaliana@NP_186751             | RRLYH      | ENVID      | HYENPRNVGS | F-DKNDP-NV | GTGLVGNPVC | GDVMTIYIKV  |
| 7227_Dmelanogaster@NP_649840         | VALYH      | ENVVE      | HYENPRNVGS | L-DKNDV-TV | GTGLVGNPVC | GDVMTIYIKV  |
| 6239_Celegans@NP_502658              | VALYH      | EKVID      | HYENPRNVGS | L-DKNDP-SV | GTGLVGNPVC | GDVMTIYIKV  |

|                                      |           |            |            |            |             |
|--------------------------------------|-----------|------------|------------|------------|-------------|
| 243233_Mcapsulatus@YP_112782         | N-E-E---G | --VIEDAKFK | TYGCGSAIAS | SSLVTEWVKG | KTVDQALAIK  |
| 458817_Shalfaxensis@YP_001673798     | D-D-N---G | --IIEDAKFK | TYGCGSAIAS | SSLVTEWVKG | KTVAEALAIK  |
| 398579_Spealeana@YP_001501349        | D-D-N---G | --IIEDAKFK | TYGCGSAIAS | SSLVTEWVKG | KTVAEALAIK  |
| 557598_Lhongkongensis@YP_002796852   | N-E-N---G | --VIEDAKFK | TYGCGSAIAS | SSLVTEWVKG | KTLDEALAIK  |
| 521006_Ngonorrhoeae@YP_002001906     | N-D-E---G | --IIEDAKFK | TYGCGSAIAS | SSLITEWVKG | KSLDDALAIK  |
| 489653_Nlactamica@YP_004048810       | N-D-E---G | --IIEDAKFK | TYGCGSAIAS | SSLITEWVKG | KSLDDALAIK  |
| 935589_Nmeningitidis@YP_005903962    | N-D-E---G | --IIEDAKFK | TYGCGSAIAS | SSLITEWVKG | KSLDDALAIK  |
| 395495_Lcholodnii@YP_001790394       | N-PLT---G | --MIEDAKFK | TYGCGSAIAS | SSLVTEWVKG | KTLDQALAIK  |
| 999541_Bgladioli@YP_004361365        | G-S-D---G | --VIEDAKFK | TYGCGSAIAS | SSLVTEWVKG | KTLDQALAIK  |
| 983917_Rgelatinosus@YP_005439140     | DPS-T---G | --VIEDARFK | TYGCGSAIAS | SSLVTEWVKG | KTLEQALAIK  |
| 1416914_Bpnomenus@YP_008837319       | N-E-A---G | --VIEDAKFK | TYGCGSAIAS | SSLVTEWVKG | KTLDQALAIK  |
| 1380774_Psp@YP_008881415             | N-E-A---G | --VIEDAKFK | TYGCGSAIAS | SSLVTEWVKG | KTLDQALAIK  |
| 1249661_Bthailandensis@YP_007917844  | G-E-N---G | --VIEDAKFK | TYGCGSAIAS | SSLVTEWVKG | KTLDEALAIK  |
| 320388_Bmallei@YP_993528             | G-A-D---G | --VIEDAKFK | TYGCGSAIAS | SSLVTEWVKG | KTLDEALAIK  |
| 536230_Bpseudomallei@YP_002897469    | G-A-D---G | --VIEDAKFK | TYGCGSAIAS | SSLVTEWVKG | KTLDEALAIK  |
| 395019_Bmultivorans@YP_001579332     | G-A-D---G | --VIEDAKFK | TYGCGSAIAS | SSLVTEWVKG | KTLDEALAIK  |
| 626418_Bglumae@YP_002912250          | G-T-D---G | --VIEDAKFK | TYGCGSAIAS | SSLVTEWVKG | KTLDEALAIK  |
| 365044_Pnaphthalenivor@YP_981803     | N-A-E---G | --VIEDAKFK | TYGCGSAIAS | SSLVTEWVRG | RTLDEALAIK  |
| 266265_Bxenovorans@YP_553871         | N-E-E---G | --VIEDAKFK | TYGCGSAIAS | SSLVTEWVRG | RTLDEALAIR  |
| 269482_Bvietnamiensis@YP_001115172   | N-A-D---G | --VIEDARFK | TYGCGSAIAS | SSLVTEWVRG | RTLDEALAIK  |
| 583345_Mmobilis@YP_003049105         | N-D-S---G | --IIEDAKFK | TYGCGSAIAS | SSLVTEWLKG | RTIEEAYAIK  |
| 666681_Mversatilis@YP_003674921      | N-D-S---G | --IIEDAKFK | TYGCGSAIAS | SSLVTEWLKG | RTIEEAYAIK  |
| 391038_Bphymatum@YP_001857685        | G-A-D---G | --VIEDAKFK | TYGCGSAIAS | SSLVTEWVKG | KTLDEALSIIK |
| 398577_Bambifaria@YP_001808732       | G-A-D---G | --VIEDAKFK | TYGCGSAIAS | SSLVTEWVKG | KTLDEALSIIK |
| 269482_Bvietnamiensis@YP_001120041   | G-A-D---G | --VIEDAKFK | TYGCGSAIAS | SSLVTEWVKG | KTLDEALSIIK |
| 406425_Bcenocapacia@YP_001765425     | G-A-D---G | --VIEDAKFK | TYGCGSAIAS | SSLVTEWVKG | KTLDEALSIIK |
| 1009846_Bcepacia@YP_006615433        | G-A-D---G | --VIEDAKFK | TYGCGSAIAS | SSLVTEWVKG | KTLDEALSIIK |
| 482957_Blata@YP_369669               | G-A-D---G | --VIEDAKFK | TYGCGSAIAS | SSLVTEWVKG | KTLDEALSIIK |
| 748280_Psp@YP_004848592              | N-E-N---G | --VIEDAKFK | TYGCGSAIAS | SSLVTEWVKG | KTLDEAMSIIK |
| 1229205_Bphenoliruptrix@YP_006834626 | G-A-D---G | --IIEDAKFK | TYGCGSAIAS | SSLVTEWVKG | KTLDEAMSIIK |
| 1163617_Sdenitrificans@YP_008546117  | N-K-D---G | --VIEDAKFK | TYGCGSAIAS | SSLVTEWVKG | KTLDEALTIK  |
| 266265_Bxenovorans@YP_559453         | G-A-D---G | --IIEDAKFK | TYGCGSAIAS | SSLVTEWVKG | KTLDQAMSIIK |
| 398527_Bphytofirmans@YP_001896197    | G-A-D---G | --IIEDAKFK | TYGCGSAIAS | SSLVTEWVKG | KTLDQAMSIIK |
| 375286_Bjsp@YP_001352943             | G-A-D---G | --VIQDAKFK | TYGCGSAIAS | SSLVTEWVKG | KTLDQAMSIIK |
| 204773_Harsenicoxydans@YP_001100494  | G-A-D---G | --VIEDAKFK | TYGCGSAIAS | SSLVTEWVKG | KTLDQALSIIK |
| 580332_Slithotrophicus@YP_003524869  | G-K-D---G | --LIEDAKFK | TYGCGSAIAS | SSLVTEWVKG | KTVDQALAIK  |
| 159087_Daromatica@YP_285167          | N-K-S---G | --VIEDAKFK | TYGCGSAIAS | SSLVTEWVKG | KTVDQALSIIK |
| 882378_Brhizoxinica@YP_004029636     | G-A-D---G | --VIEDAKFK | TYGCGSAIAS | SSLVTEWVKG | KTLDQALSIIK |
| 85643_Tsp@YP_002355840               | G-K-D---G | --VIEDAKFK | TYGCGSAIAS | SSLVTEWVKG | KTLDQALDIK  |
| 757424_Hseropedicae@YP_003776230     | D-H-N---G | --IIEDAKFK | TYGCGSAIAS | SSLVTEWLKG | RTLDDALDIK  |
| 522306_Caccumulibacter@YP_003167247  | G-K-G---G | --VIEDAKFK | TYGCGSAIAS | SSLVTEWVKG | KTIDQALDIK  |
| 76114_Aaromaticum@YP_160687          | G-K-D---G | --VIEDAKFK | TYGCGSAIAS | SSLVTEWVKG | KTVDQALEIK  |
| 381666_Reutropha@YP_725668           | N-E-A---G | --VIEDAKFK | TYGCGSAIAS | SSLVTEWVKG | KTVDQALEIK  |
| 977880_Ctaiwanensis@YP_002005171     | N-E-A---G | --VIEDAKFK | TYGCGSAIAS | SSLVTEWVKG | KTVDQALEIK  |
| 1042878_Cnecator@YP_004684939        | N-E-A---G | --VIEDAKFK | TYGCGSAIAS | SSLVTEWVKG | KTVDQALEIK  |
| 266264_Cmetallidurans@YP_583181      | N-E-A---G | --VIEDAKFK | TYGCGSAIAS | SSLVTEWVKG | KTVDQALEIK  |
| 395494_Gcapsiferriiform@YP_003846450 | G-K-D---G | --IIEDAKFK | TYGCGSAIAS | SSLVTEWVKG | KTVDQALQIK  |
| 859655_Rsolanacearum@YP_005996961    | N-E-O---G | --VIEDAKFK | TYGCGSAIAS | SSLVTEWVKG | KTLDQALEIR  |
| 402626_Rpickettii@YP_001898467       | N-E-O---G | --VIEDAKFK | TYGCGSAIAS | SSLVTEWVKG | KTLDQALEIR  |
| 543913_bproteobacteriu@YP_007502653  | N-D-O---G | --VIEDAKFK | TYGCGSAIAS | SSLVTEWVKG | KTLDQALEIR  |
| 62928_Asp@YP_933519                  | G-K-D---G | --VIEDAKFK | TYGCGSAIAS | SSLVTEWVKG | KTLDQALEIK  |
| 640081_Dsuillum@YP_005028573         | N-K-E---G | --VIEDAKFK | TYGCGSAIAS | SSLVTEWVKG | KSLDQALEIK  |
| 452638_Pnecessarius@YP_001797351     | N-D-O---G | --VIEDAKFK | TYGCGSAIAS | SSLVTEWVKG | KTLDQAFEIK  |
| 292415_Tdenitrificans@YP_314923      | G-K-D---G | --LIEDAKFK | TYGCGSAIAS | SSLVTEWVKG | KTLDQAMEIK  |
| 265072_Mflagellatus@YP_544916        | N-D-O---G | --IIEDAKFK | TYGCGSAIAS | SSLVTELIK  | SSLVTELIK   |
| 582744_Mglucosetrophus@YP_003051619  | N-E-A---G | --VIEDAKFK | TYGCGSAIAS | SSLVTEWIKG | KTLDQVMEIK  |
| 887061_Msp@YP_004040241              | N-E-A---G | --VIEDAKFK | TYGCGSAIAS | SSLVTEWIKG | KTLDQVMEIK  |
| 891398_CTremblaya@YP_004707015       | R---H---G | --MVDEVRFQ | TYGCGSARAA | SSLVTEWIKG | RPLEEALVIR  |
| 426114_Tarsenitoxydans@YP_003623866  | N-D-O---G | --VIEDARFK | TYGCGSAIAS | SSLVTEWVKG | KTLDQALEIR  |
| 75379_Tintermedia@YP_003642782       | N-D-O---G | --VIEDARFK | TYGCGSAIAS | SSLVTEWVKG | KTLDQALEIR  |
| 937774_Tequigenitalis@YP_004130301   | N-D-S---G | --IIEDAKFK | TYGCGSAIAS | SSLVTEWVKG | KSLDQAMDIIK |
| 1008459_Tasinigenitalis@YP_004874474 | N-D-S---G | --IIEDARFK | TYGCGSAIAS | SSLVTEWVKG | KSLDQAMDIIK |
| 634503_Eictaluri@YP_002934567        | N-N-E---G | --IIEDARFK | TYGCGSAIAS | SSLVTEWVKG | KSLEQAAEIK  |
| 718251_Etarda@YP_005700147           | N-N-E---G | --IIEDARFK | TYGCGSAIAS | SSLVTEWVKG | KSLEQAAEIK  |
| 259536_Parcticus@YP_264760           | D-D-N---G | --IIEDARFK | TYGCGSAIAS | SSLVTEWLKG | KSLDQAGEIK  |
| 335284_Pcryohalolentis@YP_580918     | D-D-N---G | --IIEDARFK | TYGCGSAIAS | SSLVTEWLKG | KSLDQAGEIK  |
| 571800_Psp@YP_008163576              | N-D-N---G | --IIEDARFK | TYGCGSAIAS | SSLVTEWLKG | KSLDQAGEIK  |
| 420662_Mpetroleiphilum@YP_001021452  | NPA-T---G | --LIEDAKFK | TYGCGSAIAS | SSLVTEWVKG | KSLDEALTIK  |
| 243365_Cviolaceum@NP_900763          | G-A-D---G | --VIEDAKFK | TYGCGSAIAS | SSLVTEWVKG | KSLDEALAIK  |
| 1208919_CKinetoplastiba@YP_007459239 | N-D-D---G | --FIEDAKFK | TYGCGSAIAS | SSLVTEWVKG | KSIDQALSIR  |
| 983545_Gsp@YP_004435367              | G-A-T---G | --IIEDAKFK | TYGCGSAIAS | SSLVTEWVKG | KSIDDAVKIS  |
| 342610_Patlantica@YP_660819          | G-A-N---G | --IIEDAKFK | TYGCGSAIAS | SSLVTEWVKG | KSIDDAVKIS  |
| 743299_Aferriivorans@YP_004783591    | N-G-O---G | --IIEDAKFK | TYGCGSAIAS | SSLVTEWVKG | KTLDEAMTIK  |
| 243159_Aferrooxidans@YP_002425162    | N-G-O---G | --IIEDAKFK | TYGCGSAIAS | SSLVTEWVKG | KTLDEAMTIK  |
| 1005048_Cfungivorans@YP_004753777    | G-A-D---G | --IIEDAKFK | TYGCGSAIAS | SSLVTEWVKG | KTLDQAMSIIK |
| 669502_Cproffftella@YP_008343646     | N-K-N---G | --VITDAKFK | TYGCGSAIAS | SSLVTEWVKG | KTLDEAMSIIK |
| 757424_Hseropedicae@YP_003776535     | G-A-D---G | --VIQDAKFK | TYGCGSAIAS | SSLVTEWVKG | KTLDEALSIIK |
| 395495_Lcholodnii@YP_001790080       | DPA-T---G | --KIADARFK | TYGCGSAIAS | SSLVTEWVKG | KTLDEALTIK  |
| 257310_Bbronchiseptica@NP_888820     | N-E-A---G | --VIEDARFK | TYGCGSAIAS | SSLVTEWVKG | KTLDEAMNIR  |
| 990288_Acaldus@YP_004748177          | N-A-Q---G | --IIEDARFK | TYGCGSAIAS | SSLVTEWVKG | KTLDEAMTIK  |
| 990288_Acaldus@YP_004748110          | N-E-E---G | --IIEDARFK | TYGCGSAIAS | SSLVTEWVKG | KTLDEALTIK  |
| 983917_Rgelatinosus@YP_005436383     | DPS-T---G | --LIEDARFK | TYGCGSAIAS | SSLVTEWVKG | KTLDQALTIK  |
| 360910_Bavium@YP_786035              | N-S-E---G | --VIEDARFK | TYGCGSAIAS | SSLVTEWVKG | KTLDQALSIR  |
| 1036672_Akashmirensis@YP_006379415   | N-K-E---G | --VIEDARFK | TYGCGSAIAS | SSLVTEWVKG | KTLDQALDIR  |
| 340100_Bpetrii@YP_001631386          | S-E-S---G | --VIEDARFK | TYGCGSAIAS | SSLVTEWVKG | KTLDEALDIR  |
| 523791_Kkorensis@YP_003146685        | N-E-O---G | --IIEDAKFK | TYGCGSAIAS | SSLITEWVKG | KTVDQALTIK  |
| 156889_Mmarinus@YP_866958            | D-D-N---G | --VIEDAKFK | TYGCGSAIAS | SSLVTEWIKG | KTIDEALTIK  |



|                                      |           |            |            |            |             |
|--------------------------------------|-----------|------------|------------|------------|-------------|
| 404589_Asp@YP_001377835              | N-G-E---G | --VIEDAKFK | TFGCGSAIAS | SSLVTEWVKG | RTVDEALTIK  |
| 290397_Adehalogenans@YP_463806       | S-D-D---G | --IIEDAKFK | TFGCGSAIAS | SSLVTEWVKG | RTVVEEALTIK |
| 447217_Asp@YP_002132996              | S-D-D---G | --VIEDAKFK | TFGCGSAIAS | SSLVTEWVKG | RTVVEEALTIK |
| 455488_Adehalogenans@YP_002491042    | S-D-D---G | --VIEDAKFK | TFGCGSAIAS | SSLVTEWVKG | RTVVEEALTIK |
| 378806_Saurantiaca@YP_003955403      | T-D-E---G | --VIEDAKFK | TFGCGSAIAS | SSLVTEWVKG | KTVDQAMTIS  |
| 246197_Mxanthus@YP_633158            | S-E-D---G | --LIEDARFK | TFGCGSAIAS | SSLVTEWVKG | KTVDQAMTIS  |
| 483219_Mfulvus@YP_004669542          | S-E-D---G | --LIEDARFK | TFGCGSAIAS | SSLVTEWVKG | KTVDQAMTIS  |
| 1144275_Ccoralloides@YP_005368444    | S-D-T---G | --VIEDARFK | TFGCGSAIAS | SSLVTEWVKG | KTVDQAMTIS  |
| 1278073_Mstipitatus@YP_007362455     | S-D-D---G | --LIEDARFK | TFGCGSAIAS | SSLVTEWVKG | KTVDQAMTIS  |
| 448385_Scellulosum@YP_001617979      | G-E-G---G | --VIEDAKFK | TFGCGSAIAS | SSLATEWLKG | KTIDEAETIK  |
| 399739_Pmendocina@YP_001188990       | N-E-S---G | --VIEDAKFK | TYGCGSAIAS | SSLATEWMKG | KTLDDEAESIK |
| 1294143_Pdenitrificans@YP_007659193  | N-E-O---G | --VIEDAKFK | TYGCGSAIAS | SSLATEWMKG | KTLDDEAESIK |
| 208964_Paeruginosa@NP_252502         | N-E-O---G | --VIEDAKFK | TYGCGSAIAS | SSLATEWMKG | KTLDDEAESIK |
| 322710_Avinelandii@YP_002801150      | N-E-O---G | --IIEDAKFK | TYGCGSAIAS | SSLATEWMKG | RTLEEAETIK  |
| 644801_Pstutzeri@YP_007239445        | N-E-O---G | --VIEDAKFK | TYGCGSAIAS | SSLATEWMKG | KTLEEAETIK  |
| 1207075_Psp@YP_007027941             | N-D-A---G | --IIEDAKFK | TYGCGSAIAS | SSLATEWMKG | KTLDDEAETIK |
| 1114970_Pfluorescens@YP_005206437    | N-E-O---G | --IIEDAKFK | TYGCGSAIAS | SSLATEWMKG | KTLDDEAETIK |
| 220664_Pprotogens@YP_262044          | N-E-O---G | --IIEDAKFK | TYGCGSAIAS | SSLATEWMKG | KTLDDEAETIK |
| 351746_Pputida@YP_001266219          | N-E-O---G | --VIEDAKFK | TYGCGSAIAS | SSLATEWMKG | KTLDDEAETIK |
| 1435058_Pmonteilii@YP_008958359      | N-E-O---G | --VIEDAKFK | TYGCGSAIAS | SSLATEWMKG | KTLDDEAETIK |
| 743720_Pfulva@YP_004475358           | N-E-O---G | --VIEDAKFK | TYGCGSAIAS | SSLATEWMKG | KTLDDEAETIK |
| 264730_Psyringae@YP_273568           | N-E-O---G | --VIEDAKFK | TYGCGSAIAS | SSLATEWMKG | KTLDDEAETIK |
| 384676_Pentomophila@YP_606728        | N-E-O---G | --VIEDAKFK | TYGCGSAIAS | SSLATEWMKG | KTLDDEAETIK |
| 1430440_Mgryphiswaldens@YP_008937260 | S-B-E---G | --IIEDAKFK | TFGCGSAIAS | SSLVTEWVKG | KTLDDEAAAIK |
| 749219_Mcatarrhalis@YP_003626770     | S-D-D---G | --IIEDAKFK | TYGCGSAIAS | SSLVTEWLKG | KTLDQAAAIK  |
| 62977_Asp@YP_046090                  | N-N-D---G | --VIEEARFK | TYGCGSAIAS | SSLVTEWLKG | KTLDQAQAIK  |
| 436717_Aoleivorans@YP_003732380      | N-D-S---G | --VIEEARFK | TYGCGSAIAS | SSLVTEWLKG | KTLDDEAQAIK |
| 400667_Abaumannii@YP_001084660       | N-D-N---G | --VIEEARFK | TYGCGSAIAS | SSLVTEWLKG | KTLDDEAQAIK |
| 871585_Acalcoaceticus@YP_004995269   | N-D-S---G | --VIEEARFK | TYGCGSAIAS | SSLVTEWLKG | KTLDDEAQAIK |
| 511062_Osp@YP_005091814              | S-E-D---G | --IIEDAKFK | TYGCGSAIAS | SSLITEWVKG | KSLDEAASIK  |
| 318167_Sfrigidimarina@YP_751106      | N-A-D---G | --IIEDAKFK | TYGCGSAIAS | SSLVTEWVKG | KSVDEAAAIK  |
| 326297_Samazonensis@YP_927171        | N-D-A---G | --IIEDAKFK | TYGCGSAIAS | SSLVTEWVKG | KSIEEAAAIK  |
| 318161_Sdenitrificans@YP_562467      | S-A-D---G | --IIEDAKFK | TYGCGSAIAS | SSLVTEWVKG | KSVEQAGSIK  |
| 167879_Cpsychrerythrae@YP_267876     | S-D-D---G | --IIEDAKFK | TYGCGSAIAS | SSLVTEWVKG | KSIEEAGEIK  |
| 637905_Sviolacea@YP_003556341        | D-D-K---G | --MIQDAKFK | TYGCGSAIAS | SSLITEWVKG | KSIEEAAAIK  |
| 225849_Spiezotolerans@YP_002311055   | D-D-N---G | --IIEDAKFK | TYGCGSAIAS | SSLVTEWVKG | KTVEEAQAIK  |
| 323850_Sloihica@YP_001094441         | D-D-N---G | --IIEDAKFK | TYGCGSAIAS | SSLVTEWVKG | KTIEEAQAIK  |
| 425104_Ssediminis@YP_001474605       | D-K-D---G | --MIEDAKFK | TYGCGSAIAS | SSLVTEWVKG | KTIEEAAAIK  |
| 392500_Swoodyi@YP_001760156          | D-A-D---G | --VIEDAKFK | TYGCGSAIAS | SSLVTEWVKG | KTIEEAAAIK  |
| 60481_Ssp@YP_737869                  | G-A-D---G | --IIEDAKFK | TYGCGSAIAS | SSLVTEWVKG | KTIEQAAAIK  |
| 211586_Soneidensis@NP_717861         | G-A-D---G | --IIEDAKFK | TYGCGSAIAS | SSLVTEWVKG | KTIEQAAAIK  |
| 693973_Sbaltica@YP_005273706         | G-A-D---G | --IIEDAKFK | TYGCGSAIAS | SSLVTEWVKG | KTIEQAAAIK  |
| 399804_Sputrefaciens@YP_006009782    | G-A-D---G | --IIEDAKFK | TYGCGSAIAS | SSLVTEWVKG | KTIEQAAAIK  |
| 298386_Pprofundum@YP_128966          | S-D-E---G | --IIEDAKFK | TYGCGSAIAS | SSLITEWVKG | KSLEDEAAAIK |
| 28173_Vnigripulchritu@YP_008621944   | S-B-E---G | --IIEDAKFK | TYGCGSAIAS | SSLVTEWVKG | KSIDEAAAIK  |
| 1219076_Valginolyticus@YP_008537102  | T-P-E---G | --IIEDAKFK | TYGCGSAIAS | SSLVTEWVKG | KSVDEAAAIK  |
| 150340_Vsp@YP_003286982              | T-P-E---G | --IIEDAKFK | TYGCGSAIAS | SSLVTEWVKG | KSVDEAAAIK  |
| 345073_Vcholerae@YP_001216234        | S-B-E---G | --IIEDAKFK | TYGCGSAIAS | SSLVTEWVKG | KSIDEAAAIK  |
| 223926_Vparahaemolytic@NP_796976     | T-P-E---G | --IIEDAKFK | TYGCGSAIAS | SSLVTEWVKG | KSIDEAAAIK  |
| 882102_Vanguillarum@YP_004566935     | T-P-E---G | --IIEDAKFK | TYGCGSAIAS | SSLVTEWVKG | KSIDEAAAIK  |
| 575788_Vsplendidus@YP_002416251      | S-A-E---G | --IIEDAKFK | TYGCGSAIAS | SSLVTEWVKG | KSIDEAAAIK  |
| 1129794_Gpsychrophila@YP_007545568   | D-K-N---G | --IIEDAKFK | TYGCGSAIAS | SSLVTEWVKG | SSIDEASTIS  |
| 196600_Vvulnificus@NP_933549         | T-P-E---G | --IIEDAKFK | TYGCGSAIAS | SSLVTEWVKG | KSIEEAAAIK  |
| 903510_Vfurnissii@YP_004993913       | S-P-E---G | --IIEDAKFK | TYGCGSAIAS | SSLVTEWVKG | KSIDEAASIK  |
| 338187_Vcampbellii@YP_001444276      | T-P-E---G | --IIEDAKFK | TYGCGSAIAS | SSLVTEWVKG | KSIDEAASIK  |
| 338187_Vcampbellii@YP_008526292      | T-P-E---G | --IIEDAKFK | TYGCGSAIAS | SSLVTEWVKG | KSIDEAASIK  |
| 314282_Psp@YP_007639631              | N-K-D---G | --IIEDAKFK | TYGCGSAIAS | SSLVTEWVKG | KTLEEAQAIT  |
| 357804_Pingrahamii@YP_942749         | G-E-N---G | --LIEDAKFK | TYGCGSAIAS | SSLVTEWVKG | KTLEQAGTIS  |
| 326442_Phaloplanktis@YP_341160       | S-A-D---G | --IIEDAKFK | TYGCGSAIAS | SSLVTEWVKG | KTLEQAATIK  |
| 234831_Psp@YP_004067531              | S-A-E---G | --VIEDAKFK | TYGCGSAIAS | SSLVTEWVKG | KTLDDEAETIK |
| 595494_Tauensis@YP_002893203         | N-E-D---G | --VIEDAKFK | TYGCGSAIAS | SSLVTEWVKG | KTLEFAAAAIK |
| 396588_Tsulfidiphilus@YP_002513559   | N-A-E---G | --VIEDAKFK | TYGCGSAIAS | SSLVTEWVKG | KTLDDEAAAIK |
| 396588_Tsulfidiphilus@YP_002514125   | N-A-E---G | --VIEDAKFK | TYGCGSAIAS | SSLVTEWVKG | KTLDDEAAAIK |
| 998088_Averonii@YP_004393031         | S-D-E---G | --IIEDAKFK | TYGCGSAIAS | SSLVTEWVKG | KTLDDEAAGIK |
| 380703_Ahydrophila@YP_856284         | S-D-D---G | --IIEDAKFK | TYGCGSAIAS | SSLVTEWVKG | KTLDDEAAGIK |
| 382245_Asalmonicida@YP_001142383     | S-D-D---G | --IIEDAKFK | TYGCGSAIAS | SSLVTEWVKG | KTLDDEAAGIK |
| 342108_Mmagneticum@YP_422390         | S-A-E---G | --IIEDAKFK | TFGCGSAIAS | SSLVTEWVKG | KTLDDEAASIK |
| 1245471_Presinovorans@YP_008101472   | N-E-O---G | --VIEDAKFK | TYGCGSAIAS | SSLATEWMKG | KTLDDEAASIK |
| 365044_Pnaphthalenivor@YP_982518     | NPI-T---G | --VIEDARFK | TYGCGSAIAS | SSLVTEWVKG | KTLDQAASIK  |
| 296591_Psp@YP_549004                 | NPA-T---G | --VIEDARFK | TYGCGSAIAS | SSLVTEWVKG | KTLDDEAASIK |
| 232721_Asp@YP_986388                 | NPD-T---G | --VIEDARFK | TYGCGSAIAS | SSLVTEWVKG | KTLDDEAASIK |
| 535289_Aebreus@YP_002553097          | NPD-T---G | --VIEDARFK | TYGCGSAIAS | SSLVTEWVKG | KTLDDEAASIK |
| 365046_Rtataouinensis@YP_004618947   | NPA-T---G | --VIEDARFK | TYGCGSAIAS | SSLVTEWVKG | KTLDDEAASIK |
| 946483_CSymbiobacter@YP_008681130    | SPD-T---G | --KIEDARFK | TFGCGSAIAS | SSLVTEWVKG | KTLDDEAVALR |
| 312309_Vfischeri@YP_204001           | S-P-E---G | --VIEDAKFK | TYGCGSAIAS | SSLVTEWVKG | KTLDDEAAAIK |
| 595537_Vparadoxus@YP_004156043       | NPE-T---G | --VIEDARFK | TYGCGSAIAS | SSLVTEWVKG | KTLDDEAAAIK |
| 316275_Asalmonicida@YP_002262235     | S-P-E---G | --IIEDAKFK | TYGCGSAIAS | SSLVTEWVKG | KTLDDEAAAIK |
| 391735_Veiseniae@YP_997138           | NPO-T---G | --VIEDARFK | TYGCGSAIAS | SSLVTEWVKG | KTLDDEAAAVK |
| 397945_Acitrulliae@YP_970793         | NPE-T---G | --VIEDARFK | TYGCGSAIAS | SSLVTEWVKG | KTLDDEAAAIK |
| 643561_Aavenae@YP_004235248          | NPE-T---G | --VIEDARFK | TYGCGSAIAS | SSLVTEWVKG | KTLDDEAAAIK |
| 398578_Dacidovorans@YP_001565014     | NPE-T---G | --VIEDARFK | TYGCGSAIAS | SSLVTEWVKG | KTLDDEAAAIK |
| 742013_Dsp@YP_004488168              | NPE-T---G | --VIEDARFK | TYGCGSAIAS | SSLVTEWVKG | KTLDDEAAAIK |
| 338969_Aferrireducens@YP_523433      | NSE-T---G | --VIEDARFK | TYGCGSAIAS | SSLVTEWVKG | KTLDQAALAK  |
| 596154_Adenitrificans@YP_004388278   | NPE-T---G | --VIEDARFK | TYGCGSAIAS | SSLVTEWVKG | KTLDDEAAAIK |
| 688245_Ctestosteroni@YP_003278774    | NPA-T---G | --VIEDARFK | TYGCGSAIAS | SSLVTEWVKG | KTLDDEAAAIK |
| 1266738_Pmirabilis@YP_008398502      | D-D-N---G | --VIEDARFK | TYGCGSAIAS | SSLVTEWVKG | KTLDDEAFAIK |
| 1124991_Mmorganii@YP_007505117       | D-D-N---G | --VIEDARFK | TYGCGSAIAS | SSLVTEWVKG | KTLDDEAFAIK |
| 406817_Xnemotophila@YP_003713469     | N-N-E---G | --IIEDARFK | TYGCGSAIAS | SSLVTEWVKG | KSLEQAEAIK  |

|                                           |           |            |            |            |            |
|-------------------------------------------|-----------|------------|------------|------------|------------|
| 291112_Pasymbiotica@YP_003040200          | N-N-E---G | --IIEDARFK | TYGCGSAIAS | SSLVTEWMKG | KSLEQAEAIK |
| 243265_Pluminescens@NP_930506             | N-N-E---G | --IIEDARFK | TYGCGSAIAS | SSLVTEWMKG | KSLEQAEAIK |
| 406818_Xbovienii@YP_003468915             | N-N-E---G | --IIEDARFK | TYGCGSAIAS | SSLVTEWMKG | KSLEQAEAIK |
| 273123_Ypseudotubercul@YP_071365          | N-E-A---G | --IIEDARFK | TYGCGSAIAS | SSLVTEWMKG | KSLEQAEAIK |
| 393305_Yenterocolitica@YP_001005390       | N-E-A---G | --IIEDARFK | TYGCGSAIAS | SSLVTEWMKG | KSLEQAEAIK |
| 1346614_Sliquefaciens@YP_008231656        | N-N-E---G | --IIEDARFK | TYGCGSAIAS | SSLVTEWMKG | KSLEQAEAIK |
| 1348660_Splymuthica@YP_008160622          | N-N-E---G | --IIEDARFK | TYGCGSAIAS | SSLVTEWMKG | KSLEQAEAIK |
| 399741_Sproteamaculans@YP_001479850       | N-N-E---G | --IIEDARFK | TYGCGSAIAS | SSLVTEWMKG | KSLEQAEAIK |
| 1249634_Smarcescens@YP_007345780          | N-D-A---G | --IIEDARFK | TYGCGSAIAS | SSLVTEWMKG | KSLEQAEAIK |
| 187410_Ypestis@NP_668657                  | N-E-A---G | --IIEDARFK | TYGCGSAIAS | SSLVTEWMKG | KSLEQAEAIK |
| 1157951_Pstuartii@YP_006215182            | N-D-N---G | --IIEDARFK | TYGCGSAIAS | SSLVTEWMKG | KSLEQAEAIK |
| 344609_Sboydii@YP_001881320               | N-D-E---G | --IIEDARFK | TYGCGSAIAS | SSLVTEWMKG | KSLEQAEAIK |
| 104623_Ssp@YP_008524031                   | N-N-D---G | --IIEDARFK | TYGCGSAIAS | SSLVTEWVKG | KSLEQAEAIK |
| 561229_Dzeae@YP_003003456                 | N-E-O---G | --IIEDARFK | TYGCGSAIAS | SSLVTEWVKG | KSLEQAEAIK |
| 590409_Ddadantii@YP_003334610             | N-E-O---G | --IIEDARFK | TYGCGSAIAS | SSLVTEWVKG | KSLEQAEAIK |
| 561230_Pcaratovorum@YP_003018589          | N-N-E---G | --IIEDARFK | TYGCGSAIAS | SSLVTEWVKG | KSLEQAEAIK |
| 561231_Pwasabiae@YP_003258666             | N-N-E---G | --IIEDARFK | TYGCGSAIAS | SSLVTEWVKG | KSLEQAEAIK |
| 1166016_Psp@YP_006282128                  | N-N-E---G | --IIEDARFK | TYGCGSAIAS | SSLVTEWVKG | KSLEQAEAIK |
| 218491_Patrosepticum@YP_051325            | N-N-E---G | --IIEDARFK | TYGCGSAIAS | SSLVTEWVKG | KSLEQAEAIK |
| 99287_Senterica@NP_461477                 | N-D-E---G | --IIEDARFK | TYGCGSAIAS | SSLVTEWVKG | KSLEQAEAIK |
| 218493_Sbongori@YP_004731144              | N-D-E---G | --IIEDARFK | TYGCGSAIAS | SSLVTEWVKG | KSLEQAEAIK |
| 290339_Csakazakii@YP_001436836            | N-N-E---G | --IIEDARFK | TYGCGSAIAS | SSLVTEWVKG | KSLEQAEAIK |
| 693216_Cturicensis@YP_003211492           | N-N-E---G | --IIEDARFK | TYGCGSAIAS | SSLVTEWVKG | KSLEQAEAIK |
| 399742_Esp@YP_001177741                   | N-N-E---G | --IIEDARFK | TYGCGSAIAS | SSLVTEWVKG | KSLEQAEAIK |
| 640513_Easburiae@YP_004829762             | N-N-E---G | --IIEDARFK | TYGCGSAIAS | SSLVTEWVKG | KSLEQAEAIK |
| 693444_Ebacterium@YP_007339349            | N-N-E---G | --IIEDARFK | TYGCGSAIAS | SSLVTEWVKG | KSLEQAEAIK |
| 290338_Ckoseri@YP_001451852               | N-N-E---G | --IIEDARFK | TYGCGSAIAS | SSLVTEWVKG | KSLEQAEAIK |
| 484021_Kpneumoniae@YP_002920722           | N-N-E---G | --IIEDARFK | TYGCGSAIAS | SSLVTEWVKG | KSLEQAEAIK |
| 637910_Crodentium@YP_003366009            | N-N-E---G | --IIEDARFK | TYGCGSAIAS | SSLVTEWVKG | KSLEQAEAIK |
| 640131_Kvariicola@YP_003438138            | N-N-E---G | --IIEDARFK | TYGCGSAIAS | SSLVTEWVKG | KSLEQAEAIK |
| 1191061_Koxytoca@YP_006500071             | N-N-E---G | --IIEDARFK | TYGCGSAIAS | SSLVTEWVKG | KSLEQAEAIK |
| 1286170_Nornithinolytic@YP_007872306      | N-N-E---G | --IIEDARFK | TYGCGSAIAS | SSLVTEWVKG | KSLEQAEAIK |
| 511145_Ecoli@NP_417024                    | N-D-E---G | --IIEDARFK | TYGCGSAIAS | SSLVTEWVKG | KSLEQAEAIK |
| 585054_Efergusonii@YP_002381825           | N-D-E---G | --IIEDARFK | TYGCGSAIAS | SSLVTEWVKG | KSLEQAEAIK |
| 198214_Sflexneri@NP_708368                | N-D-E---G | --IIEDARFK | TYGCGSAIAS | SSLVTEWVKG | KSLEQAEAIK |
| 216599_Ssonnei@YP_005457544               | N-D-E---G | --IIEDARFK | TYGCGSAIAS | SSLVTEWVKG | KSLEQAEAIK |
| 300267_Sdysenteriae@YP_404261             | N-D-E---G | --IIEDARFK | TYGCGSAIAS | SSLVTEWVKG | KSLEQAEAIK |
| 716541_Ecloacae@YP_003614361              | N-N-E---G | --IIEDARFK | TYGCGSAIAS | SSLVTEWVKG | KSLEQAEAIK |
| 701347_Elignolyticus@YP_003940771         | N-N-E---G | --IIEDARFK | TYGCGSAIAS | SSLVTEWVKG | KSLEQAEAIK |
| 630626_Sblattae@YP_006318650              | N-N-D---G | --IIEDARFK | TYGCGSAIAS | SSLVTEWVKG | KSLEQAEAIK |
| 1028307_Eaerogenes@YP_004590373           | N-N-E---G | --IIEDARFK | TYGCGSAIAS | SSLVTEWVKG | KSLEQAEAIK |
| 557723_Hparasuis@YP_002474707             | N-E-O---G | --IIEDARFK | TYGCGSAIAS | SSLITEWVKG | KSLEQAEAIK |
| 1005058_Ganatis@YP_004420698              | N-D-E---G | --IIEDARFK | TYGCGSAIAS | SSLITEWVKG | KSLEQAEAIK |
| 1075089_Pmultocida@YP_005176279           | S-E-E---G | --IIEDAKFK | TYGCGSAIAS | SSLITEWVKG | KSLEQAEAIK |
| 205914_Hsomnus@YP_718490                  | N-D-E---G | --IIEDAKFK | TYGCGSAIAS | SSLITEWVKG | KSLEQAEAIK |
| 1171377_Btrehalosi@YP_007548422           | N-D-S---G | --IIEDARFK | AYGCGSAIAS | SSLITEWVKG | KSLEQAEAIK |
| 233412_Hducreyi@NP_873560                 | N-D-D---G | --IIEDARFK | AYGCGSAIAS | SSLITEWVKG | KSLEQAEAIK |
| 416269_Apleuropneumoni@YP_001053631       | N-D-O---G | --IIEDARFK | AYGCGSAIAS | SSLITEWVKG | KSLEQAEAIK |
| 696748_Asuis@YP_006816777                 | N-D-O---G | --IIEDARFK | AYGCGSAIAS | SSLITEWVKG | KSLEQAEAIK |
| 1366053_Mhaemolytica@YP_008338465         | N-D-O---G | --IIEDARFK | AYGCGSAIAS | SSLITEWVKG | KSLEQAEAIK |
| 1334187_Hinfluenzae@YP_008544790          | N-D-N---G | --IIEDAKFK | TYGCGSAIAS | SSLITEWVKG | KSLEQAEAIK |
| 634176_Aaphrophilus@YP_003007650          | N-D-E---G | --IIEDAKFK | TYGCGSAIAS | SSLITEWVKG | KSLEQAEAIK |
| 694569_Aactinomycetemc@YP_006286355       | N-D-D---G | --IIEDAKFK | TYGCGSAIAS | SSLITEWVKG | KSLEQAEAIK |
| 862965_Hparainfluenzae@YP_004822800       | N-D-S---G | --IIEDAKFK | TYGCGSAIAS | SSLITEWVKG | KSLEQAEAIK |
| 221988_Msucciniciprodu@YP_088916          | N-E-E---G | --IIEDAKFK | TYGCGSAIAS | SSLITEWVKG | KSLEQAEAIK |
| 339671_Asuccinogenes@YP_001344170         | N-D-N---G | --IIEDAKFK | TYGCGSAIAS | SSLITEWVKG | KSLEQAEAIK |
| 550540_Fbalearica@YP_003914035            | S-E-G---G | --VIEDAKFK | TYGCGSAIAS | SSLVTEWVKG | KSLEQAEAIK |
| 396595_Tsp@YP_003460082                   | N-D-D---G | --VIEDAKFK | TYGCGSAIAS | SSLITEWVKG | KSLEQAEAIK |
| 413404_CRuthia@YP_903798                  | D-D-N---G | --VIEDAKFK | TYGCGSAIAS | SSLITEWVKG | KSLEQAEAIK |
| 412965_Cvesicomysociu@YP_001219373        | D-D-N---G | --VIEDAKFK | TYGCGSAIAS | SSLITEWVKG | KSLEQAEAIK |
| 1208921_CKinetoplastiba@YP_007448562      | N-G-D---G | --IIEDACFK | TYGCGSAIAS | SSLVTEWIKG | KSLEQAEAIK |
| 561501_Baphidicola@YP_002468877           | N-E-K---G | --IIEDACFK | TYGCGSAIAS | SSLVTEWIKG | KSLEQAEAIK |
| <b>357244_Otsutsugamushi@YP_001248706</b> | N-D-H---G | --IIEDAKFK | TFGCGSAIAS | SALVTEWIKS | KSLEQAEAIK |
| 1003201_Rtyphi@YP_005427548               | D-D-D---E | --IITDAKFK | TFGCGSAIAS | SSLVTELVKG | KSLEQAEAIK |
| 1105111_CRickettsia@YP_005365544          | D-D-D---G | --IITDAKFK | TFGCGSAIAS | SSLVTEWVKG | KSLEQAEAIK |
| 272944_Rconorii@NP_360366                 | D-D-D---G | --IITDAKFK | TFGCGSAIAS | SSLVTEWVKG | KSLEQAEAIK |
| 452659_Rrickettsii@YP_001650107           | D-D-D---G | --IITDAKFK | TFGCGSAIAS | SSLVTEWVKG | KSLEQAEAIK |
| 347255_Rafricae@YP_002845312              | D-D-D---G | --IITDAKFK | TFGCGSAIAS | SSLVTEWVKG | KSLEQAEAIK |
| 562019_Rpeacockii@YP_002916645            | D-D-D---G | --IITDAKFK | TFGCGSAIAS | SSLVTEWVKG | KSLEQAEAIK |
| 1105113_Rrhipicephali@YP_005390607        | D-D-D---G | --IITDAKFK | TFGCGSAIAS | SSLVTEWVKG | KSLEQAEAIK |
| 416276_Rmassiliae@YP_001499486            | D-D-D---G | --IITDAKFK | TFGCGSAIAS | SSLVTEWVKG | KSLEQAEAIK |
| 1105108_Rparkerii@YP_005392983            | D-D-N---G | --IITDAKFK | TFGCGSAIAS | SSLVTEWVKG | KSLEQAEAIK |
| 1105114_Rmontanensis@YP_005391246         | D-D-D---G | --IITDAKFK | TFGCGSAIAS | SSLVTEWVKG | KSLEQAEAIK |
| 1032845_Rheilongjiangen@YP_004764467      | D-D-D---G | --IITDAKFK | TFGCGSAIAS | SSLVTEWVKG | KSLEQAEAIK |
| 652620_Rjaponica@YP_004884928             | D-D-D---G | --IITDAKFK | TFGCGSAIAS | SSLVTEWVKG | KSLEQAEAIK |
| 481009_Rphilipii@YP_005300823             | D-D-D---G | --IITDAKFK | TFGCGSAIAS | SSLVTEWVKG | KSLEQAEAIK |
| 1105109_Rslovaca@YP_005426472             | D-D-D---G | --IITDAKFK | TFGCGSAIAS | SSLVTEWVKG | KSLEQAEAIK |
| 1105107_Rcanadensis@YP_005299497          | D-D-N---G | --IITDAKFK | TFGCGSAIAS | SSLVTEWVKG | KSLEQAEAIK |
| 336407_Rbellii@YP_538116                  | D-D-N---G | --IITDAKFK | TFGCGSAIAS | SSLVTEWVKG | KSLEQAEAIK |
| 315456_Rfelis@YP_246860                   | D-D-D---G | --IITDAKFK | TFGCGSAIAS | SSLVTEWVKG | KSLEQAEAIK |
| 293614_Rakari@YP_001493572                | D-D-D---G | --IITDAKFK | TFGCGSAIAS | SSLVTEWVKG | KSLEQAEAIK |
| 1105110_Raustralis@YP_005414962           | D-D-D---G | --IITDAKFK | TFGCGSAIAS | SSLVTEWVKG | KSLEQAEAIK |
| <b>434131_Nristicii@YP_003081518</b>      | D-N-N---G | --CIVDAKFK | TFGCGSAIAS | SSLATEYLIG | KSLEQAEAIK |
| <b>222891_Nsennetsu@YP_506192</b>         | D-N-N---G | --CIVDAKFK | TFGCGSAIAS | SSLATEYLIG | KSLEQAEAIK |
| 330214_CNitrospira@YP_003799619           | E-N-D---T | --IV-DAKFK | TFGCGSAIAS | SSLATEWLKG | KSLEQAEAIK |
| 984262_Sgrandis@YP_005322201              | S-E-D---G | --IIQEAQFK | TFGCGSAIAS | SSLATEWLKG | KSLEQAEAIK |
| 100901_Wendosymbiont@YP_006555868         | N-D-K---G | --VIEDAKFK | TFGCGSAIAS | SSLITEMIKG | KSLEQAEAIK |
| 66084_Wsp@YP_002727379                    | N-D-K---G | --VIEDAKFK | TFGCGSAIAS | SSLITEMIKG | KSLEQAEAIK |



|                                       |            |             |            |             |             |
|---------------------------------------|------------|-------------|------------|-------------|-------------|
| 1423892_Emuris@YP_008929080           | D-D-N---G  | --RIIDAKFK  | TFGCGAAIAA | SSLATELIK   | KTIDEAQLK   |
| 574556_Acentrale@YP_003328545         | D-E-N---G  | --TIVDAKFK  | TFGCGAAIAA | SSLATERIK   | KTIFEEACMLK |
| 320483_Amarginal@YP_002563600         | D-E-N---G  | --TIVDAKFK  | TFGCGAAIAA | SSLATERIK   | KTIFEEACMLK |
| 1184253_Aphagocytophilu@YP_008332775  | D-E-N---G  | --KIVDAKFK  | TFGCGAAIAA | SSLATERIM   | KTIDEASLLK  |
| 205920_Echaffeensis@YP_507440         | D-D-N---G  | --KIIDAKFK  | TFGCGAAIAA | SSLATELIK   | KTIDEAHLK   |
| 254945_Eruminantium@YP_180281         | D-D-N---G  | --KIIDAKFK  | TFGCGAAIAA | SSLATELIK   | KTVDEAHELK  |
| 254945_Eruminantium@YP_197308         | D-D-N---G  | --KIIDAKFK  | TFGCGAAIAA | SSLATELIK   | KTVDEAHELK  |
| 269484_Ecanis@YP_303050               | D-N-N---G  | --RIIDAKFK  | TFGCGAAIAA | SSLATELIK   | KTVDEAHLK   |
| 517418_Cthalassium@YP_001997584       | D-EKT---G  | --IIEDARFK  | TFGCGSAIAS | SSLATEMLK   | KTIDEASEIK  |
| 485917_Pheparinus@YP_003091837        | D-E-N---N  | --VITDAKFK  | TFGCGSAIAS | SSLATEWLK   | KSIDEALTID  |
| 762903_Psaltans@YP_004273747          | D-E-N---N  | --LITDAKFK  | TFGCGSAIAS | SSLATEWLK   | KTIDEAVTID  |
| 929556_Scanadensis@YP_006255074       | D-E-N---N  | --VITDAKFK  | TFGCGSAIAS | SSLATEWLK   | KTIDQALEID  |
| 760192_Hhydrossis@YP_004446110        | DPA-T---S  | --TIVDAKFK  | TFGCGSAIAS | SSLATEWLK   | KTIDQALTID  |
| 1162668_Lferrooxidans@YP_005469656    | N-D-D---G  | --LIEEAKFK  | TFGCGSAIAS | SSLATEWVK   | KTIDEALKIK  |
| 1048260_Lferriphilum@YP_006765680     | N-D-A---G  | --VIEEAKFK  | TFGCGSAIAS | SSLATEWVK   | KTVEEALQIK  |
| 240015_Acapsulatum@YP_002755573       | NPE-T---G  | --VIEEAKFK  | TFGCGSAIAS | SSLATEWVK   | KTVEEALQIK  |
| 204669_Ckoribacter@YP_589562          | NPE-T---N  | --IIEDAKFK  | TFGCGSAIAS | SSLATEWVK   | KTVDEALGIK  |
| 1198114_Gtundricola@YP_004219465      | NPE-T---O  | --VIEDAKFK  | TFGCGSAIAS | SSLATEWVK   | KTVAEALQIS  |
| 926566_Troseus@YP_006423699           | NPD-T---O  | --VIEDAKFK  | TFGCGSAIAS | SSLATEWVK   | KTVAEALAIS  |
| 401053_Tsaanensis@YP_04180969         | NPE-T---O  | --IIEDAKFK  | TFGCGSAIAS | SSLATEWVK   | KTVAEALAIS  |
| 682795_Gmallensis@YP_005055878        | NPE-T---O  | --VIEDAKFK  | TFGCGSAIAS | SSLATEWVK   | KTVAEALTIS  |
| 696127_Cmidichloria@YP_004679282      | N-PKT---O  | --IIEDVKFK  | TFGCLSAIAS | SSLATERVK   | KTLEEAARIK  |
| 871271_Czindieria@YP_003878048        | Y---K---G  | --IINKIRFK  | TYGCGSAIAS | SYLTTKIIK   | RTIEETLLIK  |
| 657324_Bfibrisolvans@YP_007819038     | N---D---E  | --IIEDVKFE  | TFGCGSAIAS | SSLATELIM   | KPVSEALQLT  |
| 768670_Cnitroreducens@YP_004051749    | D---D---N  | --GVIDVKFK  | TFGCGAAIAS | SSMATELLK   | KTVEEVLELT  |
| 717231_Fsinusarabici@YP_004603876     | N---D---D  | --GVVEDVKFK | TFGCGAAIAS | SSMATELLK   | KTVEEILELT  |
| 639282_Ddesulfuricans@YP_003496772    | N---D---E  | --GIVEDVKFK | TFGCGAAIAS | SSMATELIK   | KRVEDVLRIT  |
| 522772_Dacetiphilus@YP_003503972      | N---D---D  | --MIVEDVKFK | TFGCGAAIAS | SSMATELMIG  | KSVSEALQLT  |
| 693746_Ovalericigenes@YP_004880314    | D---K---D  | TCITIRDVKFN | TFGCGSAIAT | SSMATEMIK   | KPVKDALALS  |
| 657322_Rbromii@YP_007781362           | D---N---D  | --IITDVKFK  | TFGCGAAIAT | SSMATELIK   | KSINDALKLT  |
| 657322_Fprausnitzii@YP_007799942      | E---N---N  | --VIVDVKFL  | TFGCGAAIAT | SSMATELIK   | KTVDEALKLT  |
| 213810_Rchampanellensii@YP_007828576  | Q---N---G  | --IITDVKFK  | TFGCGAAVAT | SSMATELIK   | KPIFEALQLT  |
| 657319_[siraeum@YP_007775950          | E---D---N  | --TIKDVKFK  | TFGCGAAIAT | SSIMATEMIK  | KPLSEALKLT  |
| 293826_Ametalliredigen@YP_001320267   | D---N---D  | --MITDVKFK  | TFGCGSAIAT | SSMATEMIQ   | KTVKEVLQLT  |
| 350688_Aorelandii@YP_001513205        | E---N---D  | --RIVDVKFK  | TFGCGSAIAT | SSMATEMIK   | KTVKEALQLT  |
| 546269_Falocis@YP_005054244           | K---D---N  | --RIEDVKFK  | TYGCGSAIAS | SSMATEMIK   | KTIDEVLEVT  |
| 1511_[sticklandii@YP_003936518        | E---D---N  | --VIDVKFK   | TYGCGSAIAS | SSMATEMIK   | KTVQEALNLT  |
| 699034_Pdifficile@YP_006198328        | D---G---D  | --VIKDVKFK  | TFGCGSAIAS | SSMATEMIK   | KTIKDALELT  |
| 1128398_[acidurici@YP_006788189       | D---N---D  | --VITDVKFK  | TFGCGSAIAS | SSMATEMIK   | KTIKEALEFT  |
| 572544_Ipolytropus@YP_003967871       | E---N---D  | --IITDVKFR  | TFGCASAIAT | SSIISTEMILN | KNVSEALQLT  |
| 469604_Fnucleatum@YP_008477745        | D---N---D  | --IITDVKFR  | TFGCASAIAS | SSIISTDMIIG | KTVEDALKVT  |
| 580340_Tlienii@YP_004932350           | E---N---D  | --VITDIKFE  | TFGCASAIAS | SSMVTEMVK   | KTLDALKIT   |
| 891968_Amobile@YP_006444325           | K---D---D  | --RIVDVKFE  | TFGCAAAIAT | SSMVTEMVK   | KTLDALKVT   |
| 525903_Tacidaminovorans@YP_003316727  | R---D---G  | --KIEDVRFQ  | TFGCAAAIAT | SSMATEMIK   | KTIDEALNVT  |
| 697281_Maustraliensis@YP_004463371    | D---G---D  | --IITDVKFQ  | TFGCAAAIAT | SSMATELIK   | KTLDALAIT   |
| 309799_Dthermophilum@YP_002251521     | E---N---G  | --VIVDVKFK  | TLGCGAAIAT | SSIATEMIK   | KTIEEALKIT  |
| 368407_Mmarisnigri@YP_001047821       | E---G---D  | --RIVDARFQ  | TFGCAAAIAS | SSMATEMIL   | MTIAEAWNLS  |
| 903814_Elimosum@YP_003961665          | S---D---D  | --GIVEDASFQ | TFGCGAAIAT | SSMATEMIK   | KTIEEAAALK  |
| 931626_Awoodii@YP_005268656           | N---D---D  | --GVIDASFQ  | TFGCGAAVAS | SSMATEMIK   | KTIEEAGKFK  |
| 410358_Mlabreanum@YP_001029708        | E---N---D  | --IIVDAKFK  | TFGCGAAIAS | SSMATEMIK   | KTLEEAWTLS  |
| 679926_Mpetrolearius@YP_003895855     | R---D---D  | --IIEDVKFK  | TFGCGAAIAS | SSMATEMIK   | KTVKEAWDLS  |
| 86416_Cpasteurianum@YP_007940944      | E---D---N  | --KIEDVKFK  | TFGCGSAIAS | SSMATELIK   | KTIEEAWDLT  |
| 929506_Cbotulinum@YP_004396224        | E---D---N  | --IIKDVKFK  | TFGCGSAIAS | SSMATELVK   | KTLEDAWKLT  |
| 386415_Cnovyi@YP_878355               | E---D---N  | --IIKDVKFK  | TFGCGSAIAS | SSMATELVK   | KTLEEAWKLT  |
| 748727_Clungdahlii@YP_003779382       | E---D---D  | --VIKDVKFK  | TFGCGSAIAS | SSMATELIK   | KTLEDAWELT  |
| 1341692_Ccautoethanogenu@YP_008700753 | E---D---D  | --VIKDVKFK  | TFGCGSAIAS | SSMATELIK   | KTLEDAWELT  |
| 747365_Tnarugense@YP_004437867        | K---D---N  | --IIEDVKFE  | TYGCASAIAS | SSIASELIK   | KTLEEAWKIT  |
| 651822_Ffastidiosum@YP_007827223      | N---D---RN | --VIEDVKFK  | TFGCASAIAS | SSMATELIK   | KTIDEAWDMT  |
| 572547_Acolombiensis@YP_003553035     | E---N---D  | --HIVDIKFK  | TFGCASAIAS | SSMATELMV   | KTIEEAWNIT  |
| 212717_Ctetani@NP_781697              | E---D---N  | --IIKDVKFK  | TFGCGSAIAS | SSMATELIK   | KTLEEAWEELS |
| 431943_Ckluveri@YP_001394709          | E---D---N  | --IIKDVKFK  | TFGCGSAIAS | SSMATELIK   | KTLEEAWSLT  |
| 573061_Ccellulovorans@YP_003843335    | E---N---D  | --IIVDVKFK  | TFGCGSAIAS | SSMATELIK   | KTLDIAWQLS  |
| 508767_Cbotulinum@YP_001920515        | E---D---N  | --IIKDVKFK  | TFGCGSAIAS | SSMATEMIK   | KTLDIAWELS  |
| 931276_Csaccharoperbut@YP_007454264   | E---D---N  | --IIKDVKFK  | TFGCGSAIAS | SSMATELIK   | KTLDIAWELT  |
| 290402_Cbeijerinckii@YP_001308237     | E---D---N  | --IIKDVKFK  | TFGCGSAIAS | SSMATELIK   | KTLDIAWELT  |
| 1345695_Csaccharobutyli@YP_008674363  | E---D---N  | --IIKDVKFK  | TFGCGSAIAS | SSMATELIK   | KTLDIAWELT  |
| 269797_Mbarkeri@YP_305925             | E---D---N  | --RIADVFKQ  | TFGCGAAIAS | SSMATEMIK   | KTLEEAWSLS  |
| 188937_Macetivorans@NP_617616         | E---G---D  | --RIVDVKFQ  | TFGCGAAIAS | SSMATELIK   | KTIKEAWELS  |
| 195103_Cperfringens@YP_696469         | E---N---N  | --IIVDVKFE  | TYGCGSAIAS | SSMATELIK   | KTVEEAWELS  |
| 593750_Mformicica@YP_007249963        | E---N---N  | --IITDAKFK  | TFGCGAAIAS | SSMATELVK   | KTLEEAWDVS  |
| 456442_Mboonei@YP_001405283           | E---N---N  | --IIVDAKFK  | TFGCGAAIAS | SSMATELVK   | KTLEEAQWLS  |
| 521011_Mpalustris@YP_002466865        | R---E---N  | --RIEDVKFQ  | TFGCGAAVAS | SSIATELIK   | KTLDIAWETT  |
| 323259_Mhungatei@YP_503638            | K---D---N  | --IITDVKFQ  | TFGCGAAVAS | SSMATELIK   | KTLEEAWEVS  |
| 547558_Mmahii@YP_003541558            | E---D---N  | --VIADAKFM  | TFGCGAAIAS | SSMATELIK   | KTLEQAWKVT  |
| 644295_Mevestigatum@YP_003727500      | E---N---G  | --IIOADAKFM | TFGCGAAIAS | SSMATELIK   | KTLEEAQWVS  |
| 351627_Csaccharolyticu@YP_001181022   | E---N---G  | --IIVDAKFK  | TFGCGAAVAT | SSMATEMIK   | KTIEEALQIT  |
| 521460_Cbescii@YP_002573580           | E---N---G  | --IIVDAKFK  | TFGCGAAVAT | SSMATEMIK   | KTIEEALQIT  |
| 632292_Chydrothermalis@YP_003992133   | E---N---G  | --IIVDAKFK  | TFGCGAAVAT | SSMATEMIK   | KTIEEALQIT  |
| 632348_Ckronotskyensis@YP_004023692   | E---N---G  | --IIVDAKFK  | TFGCGAAVAT | SSMATEMIK   | KTIEEALQIT  |
| 632335_Ckristjanssonii@YP_004026829   | E---N---G  | --IIVDAKFK  | TFGCGAAVAT | SSMATEMIK   | KTIEEALQIT  |
| 632516_Clactoaceticus@YP_004798736    | E---N---G  | --IIVDAKFK  | TFGCGAAVAT | SSMATEMIK   | KTIEEALQIT  |
| 608506_Cobsidiansis@YP_003840166      | E---N---G  | --IIVDAKFK  | TFGCGAAVAT | SSMATEMIK   | KTIEEALQIT  |
| 632518_Cowensensis@YP_004002802       | E---N---G  | --IIVDAKFK  | TFGCGAAVAT | SSIATEMIK   | KTIEEALQIT  |
| 1121335_[stercorarium@YP_007372524    | E---N---N  | --VIVDAKFK  | TFGCGAAVAT | SSIATELIK   | KTIDEALKVT  |
| 1121335_[stercorarium@YP_007678972    | E---N---N  | --VIVDAKFK  | TFGCGAAVAT | SSIATELIK   | KTIDEALKVT  |
| 755731_Csp@YP_005148252               | E---D---N  | --IIVDAKFK  | TFGCGAAVAT | SSMATELVK   | KTVEEAMKIT  |
| 394503_Ccellulolyticu@YP_002506259    | E---D---N  | --IIVDAKFK  | TFGCGAAVAT | SSMATELVK   | KTVEEAMKIT  |
| 720554_[clariflavum@YP_005046370      | E---N---D  | --IINKDAKFK | TFGCGAAVAT | SSMATELVIG  | KTIDEALKIT  |

|                                      |   |   |     |    |        |        |          |          |           |          |          |          |
|--------------------------------------|---|---|-----|----|--------|--------|----------|----------|-----------|----------|----------|----------|
| 203119_Rthermocellum@YP_001037149    | E | N | D   | VI | DAKFK  | TF     | GCGAAVAT | SS       | MATELVKG  | KT       | IEEALKIT |          |
| 642492_Clentocellum@YP_004309737     | E | D | G   | II | KDAKFK | TF     | GCGAAVAT | SS       | MATELVIG  | KT       | IEEALKIT |          |
| 1384484_Aequolifaciens@YP_008663926  | D | E | NN  | VI | QDAKFK | TF     | GCGAAIAT | SS       | MATVVLVKG | KT       | VQEALKVT |          |
| 515619_Erectale@YP_002936246         | D | D | NG  | II | QEAFFK | TF     | GCGAAVAT | SS       | MATELVKG  | KT       | IQEALEVT |          |
| 718255_Rintestinalis@YP_007780168    | D | D | NG  | II | QEAFFK | TF     | GCGAAVAT | SS       | MATELVKG  | KT       | IQEALEVT |          |
| 657315_Rintestinalis@YP_007830593    | D | D | NG  | II | QEAFFK | TF     | GCGAAVAT | SS       | MATELVKG  | KT       | IQEALEVT |          |
| 357809_Lphytofermentan@YP_001560003  | D | D | NO  | VI | QDVKFK | TF     | GCGAAVAT | SS       | MATELVKG  | LT       | VQEALTVT |          |
| 610130_[saccharolyticu@YP_003823446  | D | D | NO  | II | RDVFKF | TF     | GCGAAVAT | SS       | MATEVMKG  | KS       | VQEAMAVT |          |
| 717608_[cf@YP_007849106              | D | E | NO  | II | RDVFKF | TF     | GCGAAVAT | SS       | MATELVKG  | KS       | IKEAMQVT |          |
| 245012_bproducing@YP_007810477       | D | E | NO  | II | RDVFKF | TF     | GCGAAVAT | SS       | MATELVKG  | KS       | IKEAMQVT |          |
| 657313_Rtorques@YP_007786815         | D | E | NO  | II | RDVFKF | TF     | GCGAAVAT | SS       | MATEVMKG  | KS       | IQEAEMVT |          |
| 245018_bproducing@YP_007788847       | D | D | NG  | II | QDVKFK | TF     | GCGAAVAT | SS       | MATELVKG  | KN       | IQEALQVT |          |
| 585394_Rhominis@YP_004837975         | D | E | NO  | VI | RDCKFK | TF     | GCGAAVAT | SS       | MATELVKG  | KT       | IYEALQIT |          |
| 1054217_Tarchaeon@YP_007688600       | D | E | NG  | II | RDCKFK | TF     | GCGAAIAS | SS       | MATEVMKG  | KS       | IHEALEIT |          |
| 657323_Rsp@YP_007784833              | D | D | ETH | II | KDCKFK | TF     | GCGAAVAT | SS       | MATELVMG  | KT       | IEEAMQVT |          |
| 657314_Robeum@YP_007804234           | D | D | ETH | II | KDCKFK | TF     | GCGAAVAT | SS       | MATEVMKG  | KT       | IEEAMQVT |          |
| 717962_Ccatus@YP_007770008           | D | E | NO  | VI | RDVFKF | TF     | GCGAAVAT | SS       | MATELVKG  | KT       | IYEALEVT |          |
| 552811_Dlykanthroporep@YP_003758020  | K | D | G   | II | TDSSFK | TF     | GCGAAIAT | SS       | MVTEVMKG  | KT       | IKEALEIS |          |
| 246194_Chydrogenoforma@YP_361011     | E | G | D   | KI | TDVFKF | TF     | GCGAAIAT | SS       | MVTEVMKG  | KT       | IEEAMKIT |          |
| 696281_Druminis@YP_004546667         | D | D | N   | II | KDVKFK | TF     | GCGAAVAT | SS       | MATELVKG  | KT       | IEEALQIT |          |
| 868595_Dcarboxydivoran@YP_004497987  | E | D | N   | VI | KDVKFK | TF     | GCGAAVAT | SS       | MVTEVMKG  | KT       | IEEALQIT |          |
| 349161_Dreducens@YP_001112128        | E | D | N   | II | KDVKFK | TF     | GCGAAVAT | SS       | MVTEVMKG  | KT       | IEEALQIT |          |
| 634498_Mruminantium@YP_003424309     | D | D | D   | E  | VI     | QDKFK  | TF       | GCGAAIAT | SS        | MITEIAKG | MA       | VDEALKIT |
| 406327_Mvanniellii@YP_001322697      | E | D | E   | II | KDVKFK | TF     | GCGAAIAT | SS       | MITEIAKG  | KN       | IIEALKIT |          |
| 679901_Mzhilinae@YP_004616912        | K | D | D   | II | EDVKFK | TF     | GCGAAIAT | SS       | MITEIAKG  | KT       | IEEALRIT |          |
| 224719_Msp@YP_008075510              | D | D | ND  | VI | RDVFKF | TF     | GCGAAIAT | SS       | MITEIAIG  | KT       | VDEAYNIT |          |
| 339860_Mstadthanae@YP_448034         | D | D | DN  | KL | SDVKFS | TF     | GCGAAIAT | SS       | MITEIAIG  | MD       | VDEAYNIT |          |
| 1295009_CMethanomassili@YP_008071572 | K | D | D   | II | TDVFKF | TF     | GCGAAIAS | SS       | MITEIAIG  | GN       | IIEALQIT |          |
| 420247_Msmithii@YP_001272836         | K | D | D   | VI | TDVFKF | TF     | GCGAAIAT | SS       | MITEIAIG  | KT       | IEEALQIT |          |
| 1041930_Mconradii@YP_005380864       | K | D | N   | VI | TDVFKF | TF     | GCGAAIAT | SS       | IITTEIAIG | MT       | LEDAEKIG |          |
| 304371_Mpaludicola@YP_003355464      | K | D | N   | KL | SDVFKF | TF     | GCGAAIAT | SS       | IITTEIAIG | MT       | LEDAEKIG |          |
| 1379702_Msp@YP_008915990             | E | D | D   | VI | TDVFKF | TF     | GCGAAIAT | SS       | MITEIAIG  | KT       | IEEALQIT |          |
| 351160_Marvoryzae@YP_686139          | K | D | D   | RI | EDVKFK | TF     | GCGAAIAT | SS       | MVTEVMKG  | KT       | IEEALQIT |          |
| 990316_Mconradii@YP_004384883        | K | D | D   | RI | DDVKFK | TF     | GCGAAIAT | SS       | MVTEVMKG  | KT       | IEEALQIT |          |
| 521011_Mpalustris@YP_002466708       | E | K | D   | VI | TDVFKF | TF     | GCGAAIAT | AS       | MVTEVMKG  | KT       | IEEALQIT |          |
| 1201294_Mbourgensis@YP_006544991     | R | E | N   | VI | EDIRFR | TF     | GCGAAIAT | SS       | MVTEVMKG  | KT       | IEEALQIT |          |
| 368407_Mmarisnigri@YP_001048051      | K | D | N   | VI | EDIRFR | TF     | GCGAAIAT | SS       | MVTEVMKG  | KT       | IEEALQIT |          |
| 635013_Tpotens@YP_003640662          | E | D | N   | II | KDVKFK | TF     | GCGAAIAT | SS       | MVTEVMKG  | KT       | IEEALQIT |          |
| 457570_Nthermophilus@YP_001916489    | N | N | D   | E  | IE     | EDVKFK | TF       | GCGAAIAT | SS        | IVTEVMKG | KN       | IIEALQIT |
| 574087_Aarabaticum@YP_003827335      | E | D | D   | VI | TDVFKF | TF     | GCGAAIAT | SS       | IITTEIAIG | KT       | IEEALQIT |          |
| 748449_Hhalobius@YP_007315822        | N | D | G   | KI | NDVKFK | TF     | GCGAAIAT | SS       | IATELVKG  | KS       | IEEALQIT |          |
| 338963_Pcarbinolicus@YP_006717600    | E | N | D   | II | EDVKFK | TF     | GCGAAIAS | SS       | MSELVIG   | KT       | IQEALQIT |          |
| 498761_Hmodesticaldum@YP_001680434   | E | D | N   | II | KDVKFK | TF     | GCGAAIAT | SS       | MTELVKG   | KT       | IEEALQIT |          |
| 768704_Dmeridiei@YP_006620851        | E | G | D   | II | KDVKFK | TF     | GCGAAVAT | SS       | MTELVKG   | KT       | IEEALQIT |          |
| 768706_Dorientis@YP_004969159        | E | G | D   | II | KDVKFK | TF     | GCGAAVAT | SS       | MTELVKG   | KT       | IEEALQIT |          |
| 1147129_Dsp@YP_006909410             | E | N | D   | II | KDVKFK | TF     | GCGAAVAT | SS       | MTELVKG   | KS       | VNEALQIT |          |
| 138119_Dhafniense@YP_518658          | E | G | D   | II | KDVKFK | TF     | GCGAAVAT | SS       | MTELVKG   | KS       | IEEALQIT |          |
| 645991_Sglycolicus@YP_004266248      | E | D | D   | II | KDVKFK | TF     | GCGAAVAT | SS       | MTELVKG   | KT       | IEEAMNVT |          |
| 646529_Dacidiphilus@YP_006467680     | E | G | D   | II | KDVKFK | TF     | GCGAAVAT | SS       | MTELVKG   | KT       | IEEALQIT |          |
| 272564_Dhafniense@YP_002460033       | E | G | D   | II | KDVKFK | TF     | GCGAAVAT | SS       | MTELVKG   | KT       | IEEALQIT |          |
| 756499_Ddehalogenans@YP_006431093    | D | G | D   | II | KDVKFK | TF     | GCGAAVAT | SS       | MTELVKG   | KT       | IEEALQIT |          |
| 871963_Ddichloroelimin@YP_007221311  | E | G | D   | II | KDVKFK | TF     | GCGAAVAT | SS       | MTELVKG   | KT       | IEEALQIT |          |
| 767817_Dgibsoniae@YP_007945765       | D | N | E   | VI | TDVFKF | TF     | GCGAAIAT | SS       | MTEMAKG   | KT       | IEEALQIS |          |
| 485916_Dacetoxidans@YP_003191710     | E | D | N   | II | KDVKFK | TF     | GCGAAVAT | SS       | MTEMAKG   | KT       | IEEALQIS |          |
| 555079_Toceani@YP_003825515          | K | D | D   | VI | EDVKFK | TF     | GCGAAIAT | SS       | MTEMAKG   | KT       | IEEALQIS |          |
| 349307_Mthermophila@YP_843171        | G | D | E   | KI | EDVKFK | TF     | GCGAAIAT | SS       | MTEMAKG   | KS       | IEEALQIS |          |
| 760568_Dkuznetsovii@YP_004517387     | K | D | N   | II | EDVKFK | TF     | GCGAAIAT | SS       | MTELVKG   | KT       | IEEAMQVS |          |
| 373903_Horeni@YP_002508640           | K | D | D   | II | EDVKFK | TF     | GCGAAVAT | SS       | MTELVKG   | KT       | IEEALQIS |          |
| 370438_Pthermopropioni@YP_001211605  | E | D | N   | VI | KDVKFK | TF     | GCGAAIAS | SS       | MTEMAKG   | KT       | IEEALQIS |          |
| 264732_Mthermoacetica@YP_430496      | E | D | G   | II | KDVKFK | TF     | GCGAAIAT | SS       | MTELVKG   | KT       | IEEALQIS |          |
| 96561_Doleovorans@YP_001528642       | O | D | D   | RI | ADVKFK | TF     | GCGAAIAT | SS       | MTELVKG   | KT       | IEEALQIS |          |
| 471821_uTermite@YP_001956213         | K | D | N   | KI | EDVKFK | TF     | GCGAAIAT | SS       | MSEVMKG   | KT       | IEEALQIS |          |
| 429009_Adegensii@YP_003238425        | K | E | D   | RI | AEVKFK | TF     | GCGAAIAT | AS       | MSEVMKG   | KT       | IEEALQIS |          |
| 706587_Tdiedjei@YP_006449617         | N | N | D   | VI | EDVKFK | TF     | GCGAAIAT | SS       | MSEVMKG   | KT       | IEEALQIS |          |
| 589924_Fplacidus@YP_003435557        | K | D | D   | KI | VDVKFK | TF     | GCGAAIAT | SS       | MATELVKG  | KT       | IEEALQIS |          |
| 224325_Afulgidus@NP_069024           | K | D | N   | RI | EDVKFK | TF     | GCGAAIAT | SS       | MATELVKG  | KT       | IEEALQIS |          |
| 224325_Afulgidus@NP_069399           | K | D | N   | RI | EDVKFK | TF     | GCGAAIAT | SS       | MATELVKG  | KT       | IEEALQIS |          |
| 416591_Tlettingae@YP_001470347       | E | D | D   | RI | TDVKFK | TF     | GCGAAIAT | AS       | MTEVVKG   | LT       | IEEAKLKN |          |
| 688269_Tthermarum@YP_004660083       | E | N | D   | RI | VDVKFK | TF     | GCGAAIAT | AS       | MTEVVKG   | MT       | IEEAKLKN |          |
| 374847_CKorarchaeum@YP_001737319     | E | D | G   | VI | EDVKFK | TF     | GCGAAIAT | AS       | VTEVVKG   | KR       | IEEALQIS |          |
| 583356_Iaggregans@YP_003860035       | R | D | N   | VI | EDVKFK | TF     | GCGAAIAT | AS       | VTEVVKG   | KR       | IEEALQIS |          |
| 272947_Rprowazekii@NP_220862         | G | D | E   | II | TDVFKF | TF     | GCGAAIAS | SS       | IVTEVVKG  | KS       | VDEAKQIS |          |
| 1282356_Ppoe@YP_007398800            | N | D | A   | VI | EDVKFK | TF     | GCGAAIAS | SS       | LATEVVKG  | KT       | IEEALQIS |          |
| 994484_Pbrassicacearum@YP_004352099  | N | E | G   | II | EDVKFK | TF     | GCGAAIAS | SS       | LATEVVKG  | KT       | IEEALQIS |          |
| 882944_Languillarum@YP_008488748     | T | P | E   | II | EDVKFK | TF     | GCGAAIAS | SS       | LATEVVKG  | KS       | IEEALQIS |          |
| 1167634_Axylosoxidans@YP_008032542   | N | E | A   | VI | EDARFK | TF     | GCGAAIAS | SS       | LVTEVVKG  | KT       | IEEALQIS |          |
| 257311_Bparapertussis@NP_884287      | N | E | A   | VI | EDARFK | TF     | GCGAAIAS | SS       | LVTEVVKG  | KT       | IEEALQIS |          |
| 1017264_Bpertussis@YP_005589900      | N | E | A   | VI | EDARFK | TF     | GCGAAIAS | SS       | LVTEVVKG  | KT       | IEEALQIS |          |
| 284812_Spombe@NP_592967              | N | K | D   | VI | EDVKFK | TF     | GCGAAIAS | SS       | VTEVVKG   | MT       | IEEALQIS |          |
| 559292_Scerevisiae@NP_014869         | N | D | S   | II | ENVKFK | TF     | GCGAAIAS | SS       | YTEVVKG   | SS       | IEEALQIS |          |
| 559292_Scerevisiae@NP_015190         | N | D | S   | VI | EDVKFK | TF     | GCGAAIAS | SS       | YTEVVKG   | MT       | IEEALQIS |          |
| 9606_Hsapiens@NP_998760              | D | E | K   | KI | VDARFK | TF     | GCGAAIAS | SS       | LATEVVKG  | KT       | IEEALQIS |          |
| 9606_Hsapiens@NP_055116              | D | E | K   | KI | VDARFK | TF     | GCGAAIAS | SS       | LATEVVKG  | KT       | IEEALQIS |          |
| 3702_Athaliana@NP_193953             | D | E | K   | QI | VDARFK | TF     | GCGAAIAS | SS       | VATEVVKG  | KT       | IEEALQIS |          |
| 3702_Athaliana@NP_192317             | D | E | K   | QI | VDARFK | TF     | GCGAAIAS | SS       | VATEVVKG  | KT       | IEEALQIS |          |
| 3702_Athaliana@NP_186751             | D | E | S   | QI | VDARFK | TF     | GCGAAIAS | SS       | VATEVVKG  | KT       | IEEALQIS |          |
| 7227_Dmelanogaster@NP_649840         | D | E | N   | KI | VDARFK | TF     | GCGAAIAS | SS       | LATEVVKG  | KT       | IEEALQIS |          |
| 6239_Celegans@NP_502658              | D | D | N   | KI | IEAKFK | TF     | GCGAAIAS | SS       | LATEVVKG  | KT       | IEEALQIS |          |



|                                      | NSDIAEAL | -A | LPPVKIHCSI | LAEDAIRAAV | SDYKAKLQVA | DD-GYEIRKS |
|--------------------------------------|----------|----|------------|------------|------------|------------|
| 243233_Mcapsulatus@YP_112782         | NSDIAEAL | -A | LPPVKIHCSI | LAEDAIRAAV | SDYKAKLQVA | DD-GYEIRKS |
| 458817_Shalfaxensis@YP_001673798     | NTDIAEEL | -A | LPPVKIHCSI | LAEDAIRAAV | EYKTKQSK   | -----      |
| 398579_Spealeana@YP_001501349        | NTDIAEEL | -A | LPPVKIHCSI | LAEDAIRAAV | DEYKTKQSK  | -----      |
| 557598_Lhongkongensis@YP_002796852   | NTAIAEEL | -A | LPPVKIHCSI | LAEDAIRAAV | KDYREKHGSO | E-----     |
| 521006_Ngonorrhoeae@YP_002001906     | NSEIAEEL | -E | LPPVKIHCSI | LAEDAVKAAV | ADYRKRQENR | -----      |
| 489653_Nlactamica@YP_004048810       | NSEIAEEL | -E | LPPVKIHCSI | LAEDAVKAAV | ADYRKRQENR | -----      |
| 935589_Nmeningitidis@YP_005903962    | NSEIAEEL | -E | LPPVKIHCSI | LAEDAVKAAV | ADYRKRQENR | -----      |
| 395495_Lcholodnii@YP_001790394       | NTAIAEEL | -A | LPPVKIHCSI | LAEDAIRAAV | ADYRHRHDAH | IE-CPACSPA |
| 999541_Bgladioli@YP_004361365        | NTQIAEEL | -A | LPPVKIHCSI | LAEDAIRAAV | ADYRKRHDAT | AE-DGCAA-  |
| 983917_Rgelatinosus@YP_005439140     | NTAIAEEL | -A | LPPVKIHCSI | LAEDAIRAAV | ADYRQRHAGP | GG-LIEERAC |
| 1416914_Bpnomenus@YP_008837319       | NTAIAEEL | -A | LPPVKIHCSI | LAEDAIRAAV | ADYRKRHDAT | AD-AA----- |
| 1380774_Psp@YP_008881415             | NTEIAEEL | -A | LPPVKIHCSI | LAEDAIRAAV | ADYKQKHGOT | AD-AA----- |
| 1249661_Bthailandensis@YP_007917844  | NTQIAEEL | -A | LPPVKIHCSI | LAEDAIRAAV | ADYKRRHETA | ED-GKAAA-  |
| 320388_Bmallei@YP_993528             | NTQIAEEL | -A | LPPVKIHCSI | LAEDAIRAAV | ADYKRRHETA | ED-GKAAA-  |
| 536230_Bpseudomallei@YP_002897469    | NTQIAEEL | -A | LPPVKIHCSI | LAEDAIRAAV | ADYKRRHETA | ED-GKAAA-  |
| 395019_Bmultivorans@YP_001579332     | NTQIAEEL | -A | LPPVKIHCSI | LAEDAIRAAV | ADYKRRHDTK | QD-DQAAA-  |
| 626418_Bglumae@YP_002912250          | NTQIAEEL | -A | LPPVKIHCSI | LAEDAIRAAV | ADYRKRHDAT | AE-DGCAA-  |
| 365044_Pnaphthalenivor@YP_981803     | NSDIAEEL | -A | LPPVKIHCSI | LAEDAIRAAV | ADFRARHPAG | SG-AATILTE |
| 266265_Bxenovorans@YP_553871         | NTQIAEEL | -A | LPPVKIHCSI | LAEDAIRAAV | ADYRKRHDAT | GT-AADSLQL |
| 269482_Bvietnamiensis@YP_001115172   | NTDIAEEL | -A | LPPVKIHCSI | LAEDAIRAAV | ADFRSRHPGA | GG-ETLAEQP |
| 583345_Mmobilis@YP_003049105         | NSEIAEEL | -A | LPPVKIHCSI | LAEDAIRAAV | ADIKAKQAAK | EN-A-----  |
| 666681_Mversatilis@YP_003674921      | NSEIAEEL | -A | LPPVKIHCSI | LAEDAIRAAV | ADIKAKQAAK | VT-A-----  |
| 391038_Bphymatum@YP_001857685        | NTQIAEEL | -A | LPPVKIHCSI | LAEDAIRAAV | ADYKQRHGET | AK-AGCSA-  |
| 398577_Bambifaria@YP_001808732       | NTQIAEEL | -A | LPPVKIHCSI | LAEDAIRAAV | ADYKRRHDTT | EG-DQAAA-  |
| 269482_Bvietnamiensis@YP_001120041   | NTQIAEEL | -A | LPPVKIHCSI | LAEDAIRAAV | ADYKRRHDTT | EG-DQAAA-  |
| 406425_Bcenocepacia@YP_001765425     | NTQIAEEL | -A | LPPVKIHCSI | LAEDAIRAAV | ADYKRRHDTT | ES-DQAAA-  |
| 1009846_Bcepacia@YP_006615433        | NTQIAEEL | -A | LPPVKIHCSI | LAEDAIRAAV | ADYKRRHDTT | EG-DQAAA-  |
| 482957_Blata@YP_369669               | NTQIAEEL | -A | LPPVKIHCSI | LAEDAIRAAV | ADYKRRHDTT | EG-DQAAA-  |
| 748280_Psp@YP_004848592              | NTEIAEEL | -A | LPPVKIHCSI | LAEDAIRAAV | SDYKQKHGK  | -----      |
| 1229205_Bphenoliruptrix@YP_006834626 | NTQIAEEL | -A | LPPVKIHCSI | LAEDAIRAAV | ADYKQRHGEA | VA-ESDKOHA |
| 1163617_Sdenitrificans@YP_008546117  | NTQIAEEL | -A | LPPVKIHCSI | LAEDAIRAAV | ADYKSKHGAM | VE-TAACTGS |
| 266265_Bxenovorans@YP_559453         | NTQIAEEL | -A | LPPVKIHCSI | LAEDAIRAAV | ADYKQRHGEA | VV-ADEKQHA |
| 398527_Bphytofirmans@YP_001896197    | NTQIAEEL | -A | LPPVKIHCSI | LAEDAIRAAV | ADYKQRHGEA | ASVEGDKOHA |
| 375286_Jsp@YP_001352943              | NTQIAEEL | -A | LPPVKIHCSI | LAEDAIRAAV | LDYKTKHGVA | ES-KEAA-   |
| 204773_Harsenicoxydans@YP_001100494  | NTQIAEEL | -A | LPPVKIHCSI | LAEDAIRAAV | LDYKTKHGVA | EA-EKAV--- |
| 580332_Slithotrophicus@YP_003524869  | NTHIAEEL | -A | LPPVKIHCSI | LAEDAIRAAV | ADYKAKNGAT | LE-TAACNGN |
| 159087_Daromatica@YP_285167          | NTEIAEEL | -A | LPPVKIHCSI | LAEDAIRAAV | ADYKQKHGGE | -----      |
| 882378_Brhizoxinica@YP_004029636     | NSQIAEEL | -A | LPPVKIHCSI | LAEDAIRAAV | ADYKRRHVAV | AG-EPAVOAG |
| 85643_Tsp@YP_002355840               | NTQIAEEL | -A | LPPVKIHCSI | LAEDAIRAAV | ADYKRRHVAV | -----      |
| 757424_Hseropedicae@YP_003776230     | NTAIAEEL | -A | LPPVKIHCSI | LAEDAIRAAV | ADYRHRHDAV | PE-VQCAAPA |
| 522306_Caccumulibacter@YP_003167247  | NTQIAEEL | -A | LPPVKIHCSI | LAEDAIRAAV | ADYRKRHAAV | V-----     |
| 76114_Aaromaticum@YP_160687          | NTQIAEEL | -A | LPPVKIHCSI | LAEDAIRAAV | ADYKQKHGK  | -----      |
| 381666_Reutropha@YP_725668           | NTQIAEEL | -A | LPPVKIHCSI | LAEDAIRAAV | EDYKQKHGAE | QK-AA----- |
| 977880_Ctaiwanensis@YP_002005171     | NTQIAEEL | -A | LPPVKIHCSI | LAEDAIRAAV | EDYKQKHGAE | QK-AA----- |
| 1042878_Cnecator@YP_004684939        | NTQIAEEL | -A | LPPVKIHCSI | LAEDAIRAAV | EDYKQKHGAE | QK-AA----- |
| 266264_Cmetallidurans@YP_583181      | NTQIAEEL | -A | LPPVKIHCSI | LAEDAIRAAV | DDYKQKHGPA | EQ-KAA---  |
| 395494_Gcapsiferiform@YP_003846450   | NTQIAEEL | -A | LPPVKIHCSI | LAEDAIRAAV | ADYKSKHGEN | VE-TSACTGS |
| 859655_Rsolanacearum@YP_005996961    | NTQIAEEL | -A | LPPVKIHCSI | LAEDAIRAAV | ADYKQKHGTA | EQ-KAA---  |
| 402626_Rpickettii@YP_001898467       | NTAIAEEL | -A | LPPVKIHCSI | LAEDAIRAAV | ADYKQKHGSA | EQ-KAA---  |
| 543913_bproteobacteriu@YP_007502653  | NSLIAEEL | -A | LPPVKIHCSI | LAEDAIRAAV | ADYKQKHGPA | -----      |
| 62928_Asp@YP_933519                  | NTQIAEEL | -A | LPPVKIHCSI | LAEDAIRAAV | ADYKQKHGPA | -----      |
| 640081_Dsuillum@YP_005028573         | NTDIAEEL | -A | LPPVKIHCSI | LAEDAIRAAV | ADYKQKHGDN | -----      |
| 452638_Pnecessarius@YP_001797351     | NSLIAEEL | -A | LPPVKIHCSI | LAEDAIRAAV | ADYKQKHGPA | -----      |
| 292415_Tdenitrificans@YP_314923      | NTAIAEEL | -A | LPPVKIHCSI | LAEDAIRAAV | ADYKQKHGLE | -----      |
| 265072_Mflagellatus@YP_544916        | NSDIAEEL | -A | LPPVKIHCSI | LAEDAIRAAV | ADLAKAQGAK | DG-CVA---- |
| 582744_Mglucosetrophus@YP_003051619  | NSDIAEEL | -A | LPPVKIHCSI | LAEDAIRAAV | ADLAKAQGNT | QE-AA----- |
| 887061_Msp@YP_004040241              | NSDIAEEL | -A | LPPVKIHCSI | LAEDAIRAAV | ADLAKAQGNT | QE-AA----- |
| 891398_CTremblaya@YP_004707015       | NSAIAEEL | -G | LPPVKIHCSI | LAEDAIRAAV | ADYRQKHGSO | CG-G-----  |
| 426114_Tarsenitoxydans@YP_003623866  | NSQIAEEL | -A | LPPVKIHCSI | LAEDAIRAAV | SDYQQRHGRN | AG-CALATEQ |
| 75379_Tintermedia@YP_003642782       | NSQIAEEL | -A | LPPVKIHCSI | LAEDAIRAAV | SDYQQRHGRN | AG-CALATEQ |
| 937774_Tequigenitalis@YP_004130301   | NTDIAEEL | -A | LPPVKIHCSI | LAEDAIRAAV | SDYRKKKEGK | V-----     |
| 1008459_Tasinigenitalis@YP_004874474 | NTDIAEEL | -A | LPPVKIHCSI | LAEDAIRAAV | NDYRKKKEGK | S-----     |
| 634503_Eictaluri@YP_002934567        | NTDIAEEL | -A | LPPVKIHCSI | LAEDAIRAAV | ADYKQKHSAE | -----      |
| 718251_Etarda@YP_005700147           | NTDIAEEL | -A | LPPVKIHCSI | LAEDAIRAAV | ADYKQKHSAE | -----      |
| 259536_Parcticus@YP_264760           | NSDIAEEL | -A | LPPVKIHCSI | LAEDAIRAAV | SDYKQKHIPA | -----      |
| 335284_Pcryohalolentis@YP_580918     | NSHIAEEL | -A | LPPVKIHCSI | LAEDAIRAAV | SDYKQKHVPA | -----      |
| 571800_Psp@YP_008163576              | NSHIAEEL | -A | LPPVKIHCSI | LAEDAIRAAV | SDYKQKHVPA | -----      |
| 420662_Mpetroleiphilum@YP_001021452  | NTQIAEEL | -A | LPPVKIHCSI | LAEDAIRAAV | SDYKQKHGNA | QP-AAATATH |
| 243365_Cviolaceum@NP_900763          | NTAIAEEL | -A | LPPVKIHCSI | LAEDAIRAAV | EDYKQKHGK  | -----      |
| 1208919_Ckinetoplastiba@YP_007459239 | NVDIAEEL | -A | LPPVKIHCSI | LAEDAIRAAV | EDYRQKHGSA | -----      |
| 983545_Gsp@YP_004435367              | NTDIAEEL | -A | LPPVKIHCSI | LAEDAIRAAV | EDYKQKHHL  | -----      |
| 342610_Patlantica@YP_660819          | NMDIAEEL | -A | LPPVKIHCSI | LAEDAIRAAV | EDYKQKHQ   | -----      |
| 743299_Aferriivorans@YP_004783591    | NSHIAEEL | -E | LPPVKIHCSI | LAEDAIRAAV | EDYRQKHGGA | QV-AAAPEMA |
| 243159_Aferrooxidans@YP_002425162    | NSQIAEEL | -E | LPPVKIHCSI | LAEDAIRAAV | EDYRQKHGGA | ST-AAQPEMA |
| 1005048_Cfungivorans@YP_004753777    | NTQIAEEL | -A | LPPVKIHCSI | LAEDAIRAAV | EDYKQKHGEO | KO-AA----- |
| 669502_Cproffftella@YP_008343646     | NTDIAEEL | -V | LPLKIHCSI  | LAEDAIRAAV | ESYKDKQKNI | KN-K-----  |
| 757424_Hseropedicae@YP_003776535     | NTQIAEEL | -A | LPPVKIHCSI | LAEDAIRAAV | QDYKAKHGAE | QK-AA----- |
| 395495_Lcholodnii@YP_001790080       | NTHIAEEL | -A | LPPVKIHCSI | LAEDAIRAAV | DDYKAKHQA  | -----      |
| 257310_Bbronchiseptica@NP_888820     | NTQIAEEL | -A | LPPVKIHCSI | LAEDAIRAAV | QDYKTKHGAE | TP-EAFAAN  |
| 990288_Acaldus@YP_004748177          | NSQIAEEL | -E | LPPVKIHCSI | LAEDAIRAAV | QDYKQKHGSA | AG-EAKVAAE |
| 990288_Acaldus@YP_004748110          | NRQIAEEL | -E | LPPVKIHCSI | LAEDAIRAAV | QDYRKRHGGK | SG-SEAD--- |
| 983917_Rgelatinosus@YP_005436383     | NTDIAEEL | -A | LPPVKIHCSI | LAEDAIRAAV | QDYKQKHGSA | VA-TQH---  |
| 360910_Bavium@YP_786035              | NTQIAEEL | -A | LPPVKIHCSI | LAEDAIRAAV | QDYKTKHGAA | EA-VTAD--- |
| 1036672_Akashmirensis@YP_006379415   | NKQIAEEL | -A | LPPVKIHCSI | LAEDAIRAAV | QDYKDKHTG  | -----      |
| 340100_Bpetrii@YP_001631386          | NTQIAEEL | -A | LPPVKIHCSI | LAEDAIRAAV | KDYKDKHAAV | AD-AQCETAA |
| 523791_Kkorensis@YP_003146685        | NTQIAEEL | -A | LPPVKIHCSI | LAEDAIRAAV | KDYKQKHGQ  | -----      |
| 156889_Mmarinus@YP_866958            | NKDVAEEL | -A | LPPVKIHCSI | LAEDAIRAAV | KDYRQKHQK  | GA-----    |

|                                      |             |            |             |             |            |
|--------------------------------------|-------------|------------|-------------|-------------|------------|
| 404589_Asp@YP_001377835              | NTDVANEL-N  | LPPVKIHCSV | LAEDAIIKAAV | ADWQKKRGVA  | PT-VKPDTVQ |
| 290397_Adehalogenans@YP_463806       | NTDVANEL-N  | LPPVKIHCSV | LAEDAIIKAAV | ADWQKKHGRE  | PS-VKPNTVQ |
| 447217_Asp@YP_002132996              | NTDVANEL-N  | LPPVKIHCSV | LAEDAIIKAAV | ADWQKKHGRE  | PS-VKPNTVQ |
| 455488_Adehalogenans@YP_002491042    | NTDVANEL-N  | LPPVKIHCSV | LAEDAIIKAAV | ADWQKKHGRE  | PS-VKPNTVQ |
| 378806_Saurantiaca@YP_003955403      | NKDVAREL-S  | LPPVKIHCSV | LAEDAIIKAAI | EDFKKKKRQGR | AP-KOTA--- |
| 246197_Mxanthus@YP_633158            | NKDVAREL-S  | LPPVKIHCSV | LAEDAIIKAAI | EDFKKKKRAAR | CA-KAS---- |
| 483219_Mfulvus@YP_004669542          | NKDVAREL-S  | LPPVKIHCSV | LAEDAIIKAAI | EDFKKKKRAAR | CA-KAS---- |
| 1144275_Ccoralloides@YP_005368444    | NKDVAREL-S  | LPPVKIHCSV | LAEDAIIKAAI | EDFKKKKRASR | CA-----    |
| 1278073_Mstipitatus@YP_007362455     | NKDVAREL-A  | LPPVKIHCSV | LAEDAIIKAAI | EDFKKKKRAAR | KA-CAS---- |
| 448385_Scellulosum@YP_001617979      | NSMIAEEL-H  | LPPVKIHCSV | LAEDAIIKSAI | ADFRAKCQAK  | RE-LAGAAPS |
| 399739_Pmendocina@YP_001188990       | NTQLAEEL-A  | LPPVKIHCSV | LAEDAIIKAAV | RDYKQKKGLL  | -----      |
| 1294143_Pdenitrificans@YP_007659193  | NTQLAEEL-A  | LPPVKIHCSV | LAEDAIIKAAV | RDYKQKKGLL  | -----      |
| 208964_Paeruginosa@NP_252502         | NTQLAEEL-A  | LPPVKIHCSV | LAEDAIIKAAV | RDYKQKKGLL  | -----      |
| 322710_Avinelandii@YP_002801150      | NTQLAEEL-A  | LPPVKIHCSV | LAEDAIIKAAV | RDYKQKKGLV  | -----      |
| 644801_Pstutzeri@YP_007239445        | NTQLAEEL-A  | LPPVKIHCSV | LAEDAIIKAAV | RDYREKKGLL  | -----      |
| 1207075_Psp@YP_007027941             | NTQLAEEL-A  | LPPVKIHCSV | LAEDAIIKAAV | RDYKQKKGLI  | -----      |
| 1114970_Pfluorescens@YP_005206437    | NTQLAEEL-A  | LPPVKIHCSV | LAEDAIIKAAV | RDYKQKKGLI  | -----      |
| 220664_Pprotogens@YP_262044          | NTQLAEEL-A  | LPPVKIHCSV | LAEDAIIKAAV | RDYKQKKGLI  | -----      |
| 351746_Pputida@YP_001266219          | NTQLAEEL-A  | LPPVKIHCSV | LAEDAIIKAAV | RDYKQKKGLI  | -----      |
| 1435058_Pmonteilii@YP_008958359      | NTQLAEEL-A  | LPPVKIHCSV | LAEDAIIKAAV | RDYKQKKGLI  | -----      |
| 743720_Pfulva@YP_004475358           | NTQLAEEL-A  | LPPVKIHCSV | LAEDAIIKAAV | RDYKQKKGLL  | -----      |
| 264730_Psyringae@YP_273568           | NTQLAEEL-A  | LPPVKIHCSV | LAEDAIIKAAV | RDYKQKKGLL  | -----      |
| 384676_Pentomophila@YP_606728        | NTQLAEEL-A  | LPPVKIHCSV | LAEDAIIKAAV | RDYKQKKGLI  | -----      |
| 1430440_Mgryphiswaldens@YP_008937260 | NTDIANEL-A  | LPPVKIHCSV | LAEDAIIKAAI | KDYKSKSGQT  | ED-EKAAG-- |
| 749219_Mcatarrhalis@YP_003626770     | NKDIANEL-A  | LPPVKVHCSV | LAEDAIIKAAI | EDYQTKAQA-  | -----      |
| 62977_Asp@YP_046090                  | NIDIANEL-A  | LPPVKVHCSV | LAEDAIIKAAI | EDYRNKFSKA  | -----      |
| 436717_Aoleivorans@YP_003732380      | NIDIATEL-A  | LPPVKVHCSV | LAEDAIIKAAI | EDYRSTKSKA  | -----      |
| 400667_Abaumannii@YP_001084660       | NIDIATEL-A  | LPPVKVHCSV | LAEDAIIKAAI | EDYRSTKSKA  | -----      |
| 871585_Acalcoaceticus@YP_004995269   | NIDIATEL-A  | LPPVKVHCSV | LAEDAIIKAAI | DDYRSKKSKA  | -----      |
| 511062_Osp@YP_005091814              | NTDIAEEL-A  | LPPVKIHCSI | LAEDAIIKAAI | DDYKQKKNLA  | -----      |
| 318167_Sfrigidimarina@YP_751106      | NADIAEEL-A  | LPPVKIHCSI | LAEDAIIKAAI | EYKSKQAK    | -----      |
| 326297_Samazonensis@YP_927171        | NTDIAEEL-A  | LPPVKIHCSI | LAEDAIIKAAI | EYKSKQAK    | -----      |
| 318161_Sdenitrificans@YP_562467      | NADIAEEL-A  | LPPVKIHCSI | LAEDAIIKAAI | DEYKSKQAK   | -----      |
| 167879_Cpsychrerythrae@YP_267876     | NTDIAEEL-A  | LPPVKIHCSI | LAEDAIIKAAI | EDYKSKQAK   | -----      |
| 637905_Sviolacea@YP_003556341        | NTDIAEEL-A  | LPPVKIHCSI | LAEDAIIKAAI | EDYKSKQAK   | -----      |
| 225849_Spiezotolerans@YP_002311055   | NTDIAEEL-A  | LPPVKIHCSI | LAEDAIIKAAI | DEYKTKQSK   | -----      |
| 323850_Sloihica@YP_001094441         | NTDIAEEL-A  | LPPVKIHCSI | LAEDAIIKAAI | DEYKAKHEK   | -----      |
| 425104_Ssediminis@YP_001474605       | NTDIAEEL-A  | LPPVKIHCSI | LAEDAIIKAAI | DDYKSKQTK   | -----      |
| 392500_Swoodyi@YP_001760156          | NTDIAEEL-A  | LPPVKIHCSI | LAEDAIIKAAI | DDYKSKQDK   | -----      |
| 60481_Ssp@YP_737869                  | NTDIAEEL-A  | LPPVKIHCSI | LAEDAIIKAAI | DEYKSKQAK   | -----      |
| 211586_Soneidensis@NP_717861         | NTDIAEEL-A  | LPPVKIHCSI | LAEDAIIKAAI | DEYKSKQAK   | -----      |
| 693973_Sbaltica@YP_005273706         | NTDIAEEL-A  | LPPVKIHCSI | LAEDAIIKAAI | DEYKSKQAK   | -----      |
| 399804_Sputrefaciens@YP_006009782    | NTDIAEEL-A  | LPPVKIHCSI | LAEDAIIKAAI | DEYKSKQAK   | -----      |
| 298386_Sprofundum@YP_128966          | NSDIAEEL-E  | LPPVKIHCSI | LAEDAIIKAAV | SDYKSKQAK   | -----      |
| 28173_Vnigripulchritu@YP_008621944   | NAEIAEEL-E  | LPPVKVHCSI | LAEDAIIKAAV | SDYKSKHDS   | -----      |
| 1219076_Valginolyticus@YP_008537102  | NSEIAEEL-E  | LPPVKVHCSI | LAEDAIIKAAV | ADYKSKHQE   | -----      |
| 150340_Vsp@YP_003286982              | NSEIAEEL-E  | LPPVKVHCSI | LAEDAIIKAAV | ADYKSKHQE   | -----      |
| 345073_Vcholerae@YP_001216234        | NSEIAEEL-E  | LPPVKIHCSI | LAEDAIIKAAV | ADYKSKHQE   | -----      |
| 223926_Vparahaemolytic@NP_796976     | NSEIAEEL-E  | LPPVKVHCSI | LAEDAIIKAAV | ADYKSKHQE   | -----      |
| 882102_Vanguillarum@YP_004566935     | NSEIAEEL-E  | LPPVKVHCSI | LAEDAIIKAAV | ADYKSKHQE   | -----      |
| 575788_Vsplendidus@YP_002416251      | NSEIAEEL-E  | LPPVKVHCSI | LAEDAIIKAAV | ADYKSKHQE   | -----      |
| 1129794_Gpsychrophila@YP_007545568   | NMDIAEEL-A  | LPPVKIHCSI | LAEDAIIKAAV | ADYKSKRCV   | -----      |
| 196600_Vvulnificus@NP_933549         | NSEIAEEL-E  | LPPVKVHCSI | LAEDAIIKAAV | ADYKSKHQE   | -----      |
| 903510_Vfurnissii@YP_004993913       | NSEIAEEL-E  | LPPVKVHCSI | LAEDAIIKAAV | ADYKSKHEL   | -----      |
| 338187_Vcampbellii@YP_001444276      | NSEIAEEL-E  | LPPVKVHCSI | LAEDAIIKAAV | ADYKSKHQE   | -----      |
| 338187_Vcampbellii@YP_008526292      | NSEIAEEL-E  | LPPVKVHCSI | LAEDAIIKAAV | ADYKSKHQE   | -----      |
| 314282_Psp@YP_007639631              | NTEITAEEL-A | LPPVKIHCSI | LAEDAIIKAAI | ADYRSKNS    | -----      |
| 357804_Pingrahamii@YP_942749         | NTDIAEEL-A  | LPPVKIHCSI | LAEDAIIKAAI | ADYKSKHPNA  | -----      |
| 326442_Phaloplanktis@YP_341160       | NTDIAEEL-E  | LPPVKIHCSI | LAEDAIIKAAI | ANYKSKQAK   | -----      |
| 234831_Psp@YP_004067531              | NTDIAEEL-E  | LPPVKIHCSI | LAEDAIIKAAI | ADYKSKHTN   | -----      |
| 595494_Tauensis@YP_002893203         | NTDIAEEL-A  | LPPVKIHCSI | LAEDAIIKAAI | ADYKSKKGLN  | -----      |
| 396588_Tsulfidiphilus@YP_002513559   | NTDIAEEL-A  | LPPVKIHCSI | LAEDAIIKAAI | ADFKQKSGAE  | DE-RKIA--- |
| 396588_Tsulfidiphilus@YP_002514125   | NTDIAEEL-A  | LPPVKIHCSI | LAEDAIIKAAI | ADFKQKSGAE  | EP-AKTA--- |
| 998088_Averonii@YP_004393031         | NTDIAEEL-A  | LPPVKIHCSI | LAEDAIIKAAI | ADYKQKKGL   | -----      |
| 380703_Ahydrophila@YP_856284         | NTDIAEEL-A  | LPPVKIHCSI | LAEDAIIKAAI | ADYKQKKGL   | -----      |
| 382245_Asalmonicida@YP_001142383     | NTDIAEEL-A  | LPPVKIHCSI | LAEDAIIKAAI | ADYKQKKGL   | -----      |
| 342108_Mmagnetium@YP_422390          | NTDIAEEL-A  | LPPVKIHCSI | LAEDAIIKAAI | ADYKSKSG    | -----      |
| 1245471_Presinovorans@YP_008101472   | NTDIAEEL-A  | LPPVKIHCSI | LAEDAIIKAAV | HDYKQKKGLL  | -----      |
| 365044_Pnaphthalenivor@YP_982518     | NSAIAEEL-A  | LPPVKIHCSI | LAEDAIIKAAV | NDYKQKHSIA  | EA-AH----  |
| 296591_Psp@YP_549004                 | NSAIAEEL-A  | LPPVKIHCSI | LAEDAIIKAAV | NDYKQKHAH   | -----      |
| 232721_Asp@YP_986388                 | NSQIAEEL-A  | LPPVKIHCSI | LAEDAIIKAAV | NDYKAKHGAA  | VE-AA----  |
| 535289_Aebreus@YP_002553097          | NSQIAEEL-A  | LPPVKIHCSI | LAEDAIIKAAV | NDYKAKHGAA  | VE-AA----  |
| 365046_Rtataouinensis@YP_004618947   | NSQIAEEL-A  | LPPVKIHCSI | LAEDAIIKAAV | EDYKSKRTH   | -----      |
| 946483_CSymbiobacter@YP_008681130    | NSDIAEEL-E  | LPPVKVHCSI | LAEDAIIKAAV | SDYRNKHGDT  | PA-CPDTP-- |
| 312309_Vfischeri@YP_204001           | NAEIAEEL-E  | LPPVKVHCSI | LAEDAIIKAAV | SDYRNKHQD   | -----      |
| 595537_Vparadoxus@YP_004156043       | NAEIAEEL-E  | LPPVKIHCSI | LAEDAIIKAAV | SDYKAKHGAK  | TA-ESAAEAV |
| 316275_Asalmonicida@YP_002262235     | NAEIAEEL-E  | LPPVKVHCSI | LAEDAIIKAAV | LDYRNKH     | -----      |
| 391735_Veiseniae@YP_997138           | NSEIAEEL-A  | LPPVKIHCSI | LAEDAIIKAAV | LDYKTKRMAA  | AA-VA----  |
| 397945_Acitrullii@YP_970793          | NAEIAEEL-A  | LPPVKIHCSI | LAEDAIIKAAV | QDYKAKHSAL  | AG-A-----  |
| 643561_Aavenae@YP_004235248          | NAEIAEEL-A  | LPPVKIHCSI | LAEDAIIKAAV | QDYKAKHSAL  | AG-A-----  |
| 398578_Dacidovorans@YP_001565014     | NSQIAEEL-A  | LPPVKVHCSI | LAEDAIIKAAV | DDYRAKRTAV  | VA-A-----  |
| 742013_Dsp@YP_004488168              | NSQIAEEL-A  | LPPVKVHCSI | LAEDAIIKAAV | DDYRAKRTAV  | VA-A-----  |
| 338969_Aferrireducens@YP_523433      | NSQIAEEL-A  | LPPVKIHCSI | LAEDAIIKAAV | DDYRKRKHVAA | LT-N-----  |
| 596154_Adenitrificans@YP_004388278   | NSQIAEEL-A  | LPPVKIHCSI | LAEDAIIKAAV | NDYKAKHEAA  | VE-AA----  |
| 688245_Ctestosteroni@YP_003278774    | NSQIAEEL-A  | LPPVKVHCSI | LAEDAIIKAAV | NDYRAKRTAT  | EA-----    |
| 1266738_Pmirabilis@YP_008398502      | NTDIAEEL-E  | LPPVKIHCSI | LAEDAIIKAAI | ADYKSKROGK  | -----      |
| 1124991_Mmorganii@YP_007505117       | NTDIAEEL-E  | LPPVKIHCSI | LAEDAIIKAAI | ADYKSKROGK  | -----      |
| 406817_Xnemotophila@YP_003713469     | NTDIAEEL-E  | LPPVKIHCSI | LAEDAIIKAAI | ADYKSKROAK  | -----      |



|                                           |            |             |             |            |            |
|-------------------------------------------|------------|-------------|-------------|------------|------------|
| 291112_Pasymbiotica@YP_003040200          | NTEIADEL-E | LPPVKIHCSI  | LAEDAIIKAAI | ADYKSKROGK | ----       |
| 243265_Pluminescens@NP_930506             | NTEIADEL-E | LPPVKIHCSI  | LAEDAIIKAAI | ADYKSKROGR | ----       |
| 406818_Xbovienii@YP_003468915             | NTAIAEEL-E | LPPVKIHCSI  | LAEDAIIKAAI | ADYKSKREAK | ----       |
| 273123_Ypseudotubercula@YP_071365         | NTQIAEEL-E | LPPVKIHCSI  | LAEDAIIKAAI | ADYKSKHTAK | ----       |
| 393305_Yenterocolitica@YP_001005390       | NTQIAEEL-E | LPPVKIHCSI  | LAEDAIIKAAI | ADYKSKHTAK | ----       |
| 1346614_Sliquefaciens@YP_008231656        | NTQIAEEL-E | LPPVKIHCSI  | LAEDAIIKAAI | ADYKSKHNAK | ----       |
| 1348660_Splymthica@YP_008160622           | NTQIAEEL-E | LPPVKIHCSI  | LAEDAIIKAAI | ADYKSKHSAK | ----       |
| 399741_Sproteamaculans@YP_001479850       | NTQIAEEL-E | LPPVKIHCSI  | LAEDAIIKAAI | ADYKSKHSAK | ----       |
| 1249634_Smarcescens@YP_007345780          | NTEIAEEL-E | LPPVKIHCSI  | LAEDAIIKAAI | ADYKSKHDAK | ----       |
| 187410_Ypestis@NP_668657                  | NTQIAEEL-E | LPPVKIHCSI  | LAEDAIIKAAI | ADYKSKHTAK | ----       |
| 1157951_Pstuartii@YP_006215182            | NTAIAEEL-E | LPPVKIHCSI  | LAEDAIIKAAI | ADYKSKROGK | ----       |
| 344609_Sboydii@YP_001881320               | NTQIAEEL-E | LPPVKIHCSI  | LAEDAIIKAAI | ADYKSKREAK | ----       |
| 104623_Ssp@YP_008524031                   | NTQIAEEL-E | LPPVKIHCSI  | LAEDAIIKAAI | ADYKSKHDAN | ----       |
| 561229_Dzeae@YP_003003456                 | NTQIAEEL-E | LPPVKIHCSI  | LAEDAIIKAAI | ADYKSKRGDK | ----       |
| 590409_Ddadantii@YP_003334610             | NTQIAEEL-E | LPPVKIHCSI  | LAEDAIIKAAI | ADYKSKRSDK | ----       |
| 561230_Pcarotovorum@YP_003018589          | NTQIAEEL-E | LPPVKIHCSI  | LAEDAIIKAAI | ADYKSKRDAQ | ----       |
| 561231_Pwasabiae@YP_003258666             | NTQIAEEL-E | LPPVKIHCSI  | LAEDAIIKAAI | ADYKSKRDAQ | ----       |
| 1166016_Psp@YP_006282128                  | NTQIAEEL-E | LPPVKIHCSI  | LAEDAIIKAAI | ADYKSKRDAQ | ----       |
| 218491_Patrosepticum@YP_051325            | NTQIAEEL-E | LPPVKIHCSI  | LAEDAIIKAAI | ADYKSKRDAQ | ----       |
| 99287_Senterica@NP_461477                 | NTDIADEL-E | LPPVKIHCSI  | LAEDAIIKAAI | ADYKSKREAK | ----       |
| 218493_Sbongori@YP_004731144              | NTDIADEL-E | LPPVKIHCSI  | LAEDAIIKAAI | ADYKSKREAK | ----       |
| 290339_Csakazakii@YP_001436836            | NTDIADEL-E | LPPVKIHCSI  | LAEDAIIKAAI | ADYKSKREAK | ----       |
| 693216_Cturicensis@YP_003211492           | NTDIADEL-E | LPPVKIHCSI  | LAEDAIIKAAI | ADYKSKREAK | ----       |
| 399742_Esp@YP_001177741                   | NTDIADEL-E | LPPVKIHCSI  | LAEDAIIKAAI | ADYKSKREAK | ----       |
| 640513_Easburiae@YP_004829762             | NTDIADEL-E | LPPVKIHCSI  | LAEDAIIKAAI | ADYKSKREAK | ----       |
| 693444_Ebacterium@YP_007339349            | NTDIADEL-E | LPPVKIHCSI  | LAEDAIIKAAI | ADYKSKREAK | ----       |
| 290338_Ckoseri@YP_001451852               | NTDIADEL-E | LPPVKIHCSI  | LAEDAIIKAAI | ADYKSKREAK | ----       |
| 484021_Kpneumoniae@YP_002920722           | NTDIADEL-E | LPPVKIHCSI  | LAEDAIIKAAI | ADYKSKREAK | ----       |
| 637910_Crodentium@YP_003366009            | NTDIADEL-E | LPPVKIHCSI  | LAEDAIIKAAI | ADYKSKREAK | ----       |
| 640131_Kvariicola@YP_003438138            | NTDIADEL-E | LPPVKIHCSI  | LAEDAIIKAAI | ADYKSKREAK | ----       |
| 1191061_Koxytoca@YP_006500071             | NTDIADEL-E | LPPVKIHCSI  | LAEDAIIKAAI | ADYKSKREAK | ----       |
| 1286170_Norithinolytic@YP_007872306       | NTDIADEL-E | LPPVKIHCSI  | LAEDAIIKAAI | ADYKSKREAK | ----       |
| 511145_Ecoli@NP_417024                    | NTDIAEEL-E | LPPVKIHCSI  | LAEDAIIKAAI | ADYKSKREAK | ----       |
| 585054_Efergusonii@YP_002381825           | NTDIAEEL-E | LPPVKIHCSI  | LAEDAIIKAAI | ADYKSKREAK | ----       |
| 198214_Sflexneri@NP_708368                | NTDIAEEL-E | LPPVKIHCSI  | LAEDAIIKAAI | ADYKSKREAK | ----       |
| 216599_Ssonnei@YP_005457544               | NTDIAEEL-E | LPPVKIHCSI  | LAEDAIIKAAI | ADYKSKREAK | ----       |
| 300267_Sdysenteriae@YP_404261             | NTDIAEEL-E | LPPVKIHCSI  | LAEDAIIKAAI | ADYKSKREAK | ----       |
| 716541_Ecloacae@YP_003614361              | NTDIAEEL-E | LPPVKIHCSI  | LAEDAIIKAAI | ADYKSKREAK | ----       |
| 701347_Elignolyticus@YP_003940771         | NTDIAEEL-E | LPPVKIHCSI  | LAEDAIIKAAI | ADYKSKREAK | ----       |
| 630626_Sblattae@YP_006318650              | NTDIAEEL-E | LPPVKIHCSI  | LAEDAIIKAAI | ADYKSKREAK | ----       |
| 1028307_Eaerogenes@YP_004590373           | NTDIAEEL-E | LPPVKIHCSI  | LAEDAIIKAAI | ADYKSKREAK | ----       |
| 557723_Hparasuis@YP_002474707             | NSDIAEEL-E | LPPVKVHCSI  | LAEDAIIKAAI | ADYKEKNGK  | ----       |
| 1005058_Ganatis@YP_004420698              | NSDIAEEL-E | LPPVKVHCSI  | LAEDAIIKAAI | ADYKAKNSK  | ----       |
| 1075089_Pmultocida@YP_005176279           | NSQIAEEL-E | LPPVKVHCSI  | LAEDAIIKAAI | ADYKAKKEAK | ----       |
| 205914_Hsomnus@YP_718490                  | NSQIAEEL-E | LPPVKVHCSI  | LAEDAIIKAAI | ADYKAKKAE  | ----       |
| 1171377_Btrehalosi@YP_007548422           | NSDIAEEL-E | LPPVKVHCSI  | LAEDAIIKAAI | ADYKEKCGK  | ----       |
| 233412_Hducreyi@NP_873560                 | NSDIAEEL-E | LPPVKVHCSI  | LAEDAIIKAAI | ADYKEKQAK  | ----       |
| 416269_Apleuropneumoni@YP_001053631       | NSDIAEEL-E | LPPVKVHCSI  | LAEDAIIKAAI | ADYKEKQAK  | ----       |
| 696748_Asuis@YP_006816777                 | NSDIAEEL-E | LPPVKVHCSI  | LAEDAIIKAAI | ADYKEKQAK  | ----       |
| 1366053_Mhaemolytica@YP_008338465         | NSDIAEEL-E | LPPVKVHCSI  | LAEDAIIKAAI | ADYKEKQAK  | ----       |
| 1334187_Hinfluenzae@YP_008544790          | NSQIAEEL-E | LPPVKVHCSI  | LAEDAIIKAAI | ADYKAKGGE  | ----       |
| 634176_Aaphrophilus@YP_003007650          | NSQIAEEL-E | LPPVKVHCSI  | LAEDAIIKAAI | ADYKAKKGS  | ----       |
| 694569_Aactinomycetemc@YP_006286355       | NSQIAEEL-E | LPPVKVHCSI  | LAEDAIIKAAI | ADYKAKKGS  | ----       |
| 862965_Hparainfluenzae@YP_004822800       | NSQIAEEL-E | LPPVKVHCSI  | LAEDAIIKAAI | ADYKAKKGS  | ----       |
| 221988_Msucciniciprodu@YP_088916          | NSQIAEEL-E | LPPVKVHCSI  | LAEDAIIKAAI | ADYKAKKGS  | ----       |
| 339671_Asuccinogenes@YP_001344170         | NSQIAEEL-E | LPPVKVHCSI  | LAEDAIIKAAI | ADYKAKKGE  | ----       |
| 550540_Fbalearica@YP_003914035            | NTAIAEEL-A | LPPVKIHCSI  | LAEDAIIKAAI | ADYKSKQDK  | ----       |
| 396595_Tsp@YP_003460082                   | NTQIAEEL-A | LPPVKIHCSI  | LAEDAIIKAAI | SNYOERHGON | EG-KTA---- |
| 413404_CRuthia@YP_903798                  | NSDIAEEL-S | LPPVKIHCSI  | LAEDAIIKAAI | NDIKSKA    | ----       |
| 412965_Cvesicomysociu@YP_001219373        | NSDIAEEL-S | LPPVKIHCSI  | LAEDAIIKAAI | NDIKSKI    | ----       |
| 1208921_CKinetoplastiba@YP_007448562      | NMQIAEEL-A | LPPVKIHCSI  | LAEDAIIKAAI | SDYKLNKID  | ----       |
| 561501_Baphidicola@YP_002468877           | NTIIVEEL-D | LPPVKIHCSI  | LAEDAIIKAAI | SDYKRKIN   | ----       |
| <b>357244_Otsutsugamushi@YP_001248706</b> | NSKIAEHL-A | LLPIKMHCMS  | LAEDAIIKAAI | VDYKSKONKT | ----       |
| 1003201_Rtyphi@YP_005427548               | NTEIAKEL-S | LPPVKLHCSSL | LAEDAIIKAAI | ADYKQKKGK  | KD-S----   |
| 1105111_CRickettsia@YP_005365544          | NTEIAKEL-S | LPPVKLHCSSL | LAEDAIIKAAI | ADYKQKKEK  | KD-S----   |
| 272944_Rconorii@NP_360366                 | NTEIAKEL-S | LPPVKLHCSSL | LAEDAIIKAAI | ADYKQKKEK  | KD-S----   |
| 452659_Rrickettsii@YP_001650107           | NTEIAKEL-S | LPPVKLHCSSL | LAEDAIIKAAI | ADYKQKKEK  | KD-S----   |
| 347255_Rafricae@YP_002845312              | NTEIAKEL-S | LPPVKLHCSSL | LAEDAIIKAAI | ADYKQKKEK  | KD-S----   |
| 562019_Rpeacockii@YP_002916645            | NTEIAKEL-S | LPPVKLHCSSL | LAEDAIIKAAI | ADYKQKKEK  | KD-S----   |
| 1105113_Rrhipicephali@YP_005390607        | NTEIAKEL-S | LPPVKLHCSSL | LAEDAIIKAAI | ADYKQKKEK  | KD-S----   |
| 416276_Rmassiliae@YP_001499486            | NTEIAKEL-S | LPPVKLHCSSL | LAEDAIIKAAI | ADYKQKKEK  | KD-S----   |
| 1105108_Rparkeri@YP_005392983             | NTEIAKEL-S | LPPVKLHCSSL | LAEDAIIKAAI | ADYKQKKEK  | KD-S----   |
| 1105114_Rmontanensis@YP_005391246         | NTEIAKEL-S | LPPVKLHCSSL | LAEDAIIKAAI | ADYKQKKEK  | KD-S----   |
| 1032845_Rheilongjiangen@YP_004764467      | NTEIAKEL-S | LPPVKLHCSSL | LAEDAIIKAAI | ADYKQKKEK  | KD-S----   |
| 652620_Rjaponica@YP_004884928             | NTEIAKEL-S | LPPVKLHCSSL | LAEDAIIKAAI | ADYKQKKEK  | KD-S----   |
| 481009_Rphilipii@YP_005300823             | NTEIAOEL-S | LPPVKLHCSSL | LAEDAIIKAAI | ADYKQKKEK  | KD-S----   |
| 1105109_Rslovaca@YP_005426472             | NTEIAKEL-S | LPPVKLHCSSL | LAEDAIIKAAI | ADYKQKKEK  | KD-S----   |
| 1105107_Rcanadensis@YP_005299497          | NTEIAKEL-S | LPPVKLHCSSL | LAEDAIIKAAI | ADYKQKQAK  | KT-LKT---- |
| 336407_Rbellii@YP_538116                  | NTEIAKEL-S | LPPVKLHCSSL | LAEDAIIKAAI | ADYKLLKENK | KD-S----   |
| 315456_Rfelis@YP_246860                   | NTEIAKEL-S | LPPVKLHCSSL | LAEDAIIKAAI | ADYKQKKEK  | KD-S----   |
| 293614_Rakari@YP_001493572                | NTEIAKEL-S | LPPVKLHCSSL | LAEDAIIKAAI | ADYKQKKEK  | KD-S----   |
| 1105110_Raustralis@YP_005414962           | NTEIAEEL-S | LPPVKLHCSSL | LAEDAIIKAAI | ADYKQKKEK  | KD-S----   |
| <b>434131_Nristicii@YP_003081518</b>      | NTEIASTL-C | LPPIKMHCSM  | LAEDAIIKAAI | KDFREKQAS  | ST-EEANNEN |
| <b>222891_Nsennetsu@YP_506192</b>         | NTEIASTL-C | LPPIKMHCSM  | LAEDAIIKAAI | KDFREKQVTS | ST-EEAGNEN |
| 330214_CNitrospira@YP_003799619           | NTDIVOEL-N | LPPVKIHCSI  | LAEDAIIKAAI | ADYKQKADSK | ----       |
| 984262_Sgrandis@YP_005322201              | NMAIVEEL-E | LPPVKIHCSI  | LAEDAIIKAAI | KDYQEKNAK  | ----       |
| 100901_Wendosymbiont@YP_006555868         | NTQIVKEL-S | LPPVKIHCSI  | LAEDAIIKAAI | HDYQSKQSK  | NN-----    |
| 66084_Wsp@YP_002727379                    | NTQIVEEL-S | LPPVKIHCSI  | LAEDAIIKAAI | HDYQSKQKN  | ----       |

|                                      |            |            |             |            |             |
|--------------------------------------|------------|------------|-------------|------------|-------------|
| 1423892_Emuris@YP_008929080          | NTVLVKEL-S | LPPVKIHCSL | LAEDAVKAAI  | NDYNMKQANK | KD-KLSSLSSE |
| 574556_Acentrale@YP_003328545        | NTVLAKEL-S | LPPVKIHCSL | LAEDAVKAAV  | HDYKSKQOIA | KG-DKC----  |
| 320483_Amaginace@YP_002563600        | NTVLAKEL-S | LPPVKIHCSL | LAEDAVKAAV  | HDYKSKQOIA | KG-DKC----  |
| 1184253_Aphagocytophilu@YP_008332775 | NTVLAKEL-S | LPPVKIHCSI | LAEDAVKAAI  | NDYRKKQOEV | GN-----     |
| 205920_Echaffeensis@YP_507440        | NTVLAKEL-S | LPPVKIHCSL | LAEDAVKAAI  | KDYNMKQATK | KD-KLSSSSNE |
| 254945_Eruminantium@YP_180281        | NTVLAKEL-S | LPPVKIHCSL | LAEDAVKAAI  | NDYHMKQANK | KN-ATKNPNE  |
| 254945_Eruminantium@YP_197308        | NTVLAKEL-S | LPPVKIHCSL | LAEDAVKAAI  | NDYHMKQANK | KN-ATKNPNE  |
| 269484_Ecanis@YP_303050              | NTVLAKEL-S | LPPVKIHCSL | LAEDAIIKAAI | NDYNMKQENR | KS-NTAFSSD  |
| 517418_Cthalassium@YP_001997584      | NTALVSEL-S | LPPVKIHCSV | LAEDAIIKAAI | DDFRKKQAAK | HA-KSETASAS |
| 485917_Pheparinus@YP_003091837       | NMDIVEEL-A | LPPVKIHCSV | LAEDAIIKSAI | NDYRVKNGME | PF-ELAKSHH  |
| 762903_Psaltans@YP_004273747         | NMDIVEEL-A | LPPVKIHCSV | LAEDAIIKSAI | NDYRVKNGLP | AL-EIEKSHH  |
| 929556_Scanadensis@YP_006255074      | NMDIVEEL-A | LPPVKIHCSV | LAEDAIIKSAI | NDYRVKNGME | PI-ALEKSHH  |
| 760192_Hhydrossis@YP_004446110       | NMTIVEEL-A | LPPVKIHCSV | LAEDAIRGAI  | ADYQCKNGIE | VA-VAEKAH-  |
| 1162668_Lferrooxidans@YP_005469656   | NTDIVQEL-N | LPPVKIHCSV | LAEDAIIKSAI | QDYQDKKSR- | -----       |
| 1048260_Lferriphilum@YP_006765680    | NTDIVQEL-N | LPPVKIHCSV | LAEDAIIKSAI | NDYRAKKTOT | SE-KSEKANV  |
| 240015_Acapsulatum@YP_002755573      | NTDIVKEL-A | LPPVKIHCSV | LAEDAIRAAI  | GDWKKKNGVA | ET-EAAQOTV  |
| 204669_Akoribacter@YP_589562         | NTDIVKEL-S | LPPVKIHCSV | LAEDAIRAAI  | GDWKKKNNQ- | -----       |
| 1198114_Gtundricola@YP_004219465     | NTDIVKEL-A | LPPVKIHCSV | LAEDAIRAAI  | GDWKKKNNVA | ET-EGAAVAV  |
| 926566_Troseus@YP_006423699          | NTEIVKEL-A | LPPVKIHCSV | LAEDAIRAAI  | GDWKKKNNVA | ET-EPALVGA  |
| 401053_Tsaanensis@YP_04180969        | NTDIVKEL-A | LPPVKIHCSV | LAEDAIRAAI  | GDWKKKNGQP | ES-EPALVGA  |
| 682795_Gmallensis@YP_005055878       | NTDIVKEL-A | LPPVKIHCSV | LAEDAIRAAI  | GDWKKKNGVA | EE-AGVAVAA  |
| 696127_Cmidichloria@YP_004679282     | NSEIAQEL-S | LPPVKIHCSV | LAEDAIISSAI | RDYKEKWEIG | DK-----     |
| 871271_Czindieria@YP_003878048       | NLDIANFL-L | LSPKIHCSI  | LAEEVIKFSI  | KNYYYKNNYK | YD-Y-----   |
| 657324_Bfibrisolvens@YP_007819038    | NKAVTEALDG | LPAHKLHCSV | LAEEAIKSAV  | LDYVYDNGIE | YD-PKDFPDP  |
| 768670_Cnitroreducens@YP_004051749   | NNAIVEALDG | LPPAKIHCSV | MAEEAIEAAL  | KDYKRIKIGD | PS-IVDEMKA  |
| 717231_Fsinusarabici@YP_004603876    | NNAIVEALEG | LPPAKIHCSV | MAEEAIEAAL  | KDYERYVGKD | PK-IVDEIKE  |
| 639282_Ddesulfuricans@YP_003496772   | NEAIVEALDG | LPPAKIHCSV | MAEEAIEAAL  | KDYQRIKIGD | PK-IVDEMKA  |
| 522772_Dacetiphilus@YP_003503972     | NDAIVEALGG | LPPAKIHCSV | MAEEAIEEAL  | KDYKSKGQED | PS-VVDDMKA  |
| 693746_Ovalericigenes@YP_004880314   | NKAVVEALDG | LPAVKLHCSV | LAEOAVKAAV  | KDYDDKNGIP | YG-KDLTICN  |
| 657321_Rbromii@YP_007781362          | NKAVMEALDG | LPPVKVHCSV | LAEOAIKAAV  | SDYKRRGVD  | PE-PIVGNVP  |
| 657322_Fprausnitzii@YP_007799942     | NKAVVEALEG | LPPVKVHCSV | LAEOAVKAAI  | SDYRRQGIT  | PE-PIVGLKE  |
| 213810_Rchampanellensii@YP_007828576 | NKAVVEALDG | LPAVKLHCSV | LAEOAIKAAI  | SDYRRQGIT  | PG-PIVGEVH  |
| 657319_[siraeum@YP_007775950         | NKAVVEALDG | LPPAKLHCSV | LAEOAIKAAI  | ADYITRQGIT | PT-PFVGEIK  |
| 293826_Ametalliredigen@YP_001320267  | NKAVAEALDG | LPPVKMHCSV | LAEOAVKAAI  | YDYACKNNLH | YE-DLDDFNP  |
| 350688_Aorelandii@YP_001513205       | NKAVAEALDG | LPPVKMHCSV | LAEOAVKAAI  | YDYAKENNVE | YE-ELEGFVP  |
| 546269_Falocis@YP_005054244          | NKAVAEALDG | LPPVKMHCSV | LAEEAVVAAL  | QDYAKNNLH  | IE-GITDRVL  |
| 1511_[sticklandii@YP_003936518       | NKAVAEALDG | LPPVKMHCSV | LAEOAIKKAAL | QDYALKNNLT | IE-GLTDVEF  |
| 699034_Pdifficile@YP_006198328       | NKAVAEALDG | LPPVKMHCSV | LAEOAVKAAI  | IDYACKNNIH | IE-ELDGYVI  |
| 1128398_[acidurici@YP_006788189      | NKAVVEALDG | LPPAKIHCSV | LAEOAVKSAI  | IDYAKNNID  | IE-ELEKFEL  |
| 572544_Ipolytropus@YP_003967871      | NKAVAEALDG | LPPAKMHCSV | LAEEGIKAAI  | EDYMGK---- | -----       |
| 469604_Fnucleatum@YP_008477745       | NKAVVEALGG | LPAVKMHCSV | LAEEAIKMAI  | EDYIAKRDGK | KA-Q-----   |
| 580340_Tlienii@YP_004932350          | NKDVLEELGG | LPPVKIHCSL | LAEEGIKAAI  | EDYRRRKEGK | K-----      |
| 891968_Amobile@YP_006444325          | NKDVAEALGG | LPPQKLHCSL | LAEEGIKAAI  | EDYLAKRQND | NK-KESGKQD  |
| 525903_Tacidaminovorana@YP_003316727 | NKDVAEALGG | LPPQKLHCSL | LAEOGIRAAI  | EDYLRRQRGE | SP-EPTGGSC  |
| 697281_Maustraliensis@YP_004463371   | NKTVDALDG  | LPAIKMHCSV | LAEDGLRAAI  | EDYKRRKGLI | TE-DEMAKPH  |
| 309799_Dthermophilum@YP_002251521    | NKAVTEALDG | LPPNKLHCSV | LAEEAIKAAI  | EDYLKCKKCK | -----       |
| 368407_Mmarisnigri@YP_001047821      | NTDVEDALGG | LPPQKLHCSL | LAEDAIRAAI  | DDFRTRRGLP | PI-ERGSGCC  |
| 903814_Elimosum@YP_003961665         | NSEVVEALGG | LPTKIHCSV  | LAEEAIQAAI  | EDYKSKHNA- | -----       |
| 931626_Awoodii@YP_005268656          | NSDVEDALGG | LPSKIHCSV  | LAEEAIQAAI  | ADYQNNKA-- | -----       |
| 410358_Mlabreanum@YP_001029708       | NKAVAEALDG | LPPNKMHCVS | LAEEIHKAI   | NDYLKSSGRE | PW-GDEECSS  |
| 679926_Mpetrolearius@YP_003895855    | NKAVAEALDG | LPPQKLHCSL | LAEEAIHKA   | NDYRAKNGLE | PW-EKGGHQ   |
| 86416_Cpasteurianum@YP_007940944     | NKAVAEALDG | LPPVKMHCSV | LAEEAIHKA   | NAYRESVGLE | AW-EMKTHSE  |
| 929506_Cbotulinum@YP_004396224       | NKAVAEALEG | LPPVKMHCSV | LAEEAIHTAI  | NDYRVKQGLE | PW-KMKVHSD  |
| 386415_Cnovyi@YP_878355              | NKAVAEALEG | LPPVKMHCSV | LAEEAIHTAI  | NDYRVKQGLE | PW-DMKVHSD  |
| 748727_Clungdahlii@YP_003779382      | NKAVAEALDG | LPPVKMHCSV | LAEEAIHKA   | NDYRESQGLE | PW-ATKNHSE  |
| 1341692_Cautoethanogenu@YP_008700753 | NKAVAEALDG | LPPVKMHCSV | LAEEAIHKA   | NDYRESQGLE | PW-ATKNHSE  |
| 747365_Tnarugense@YP_004437867       | NKAVAEALDG | LPPVKMHCSV | LAEEAIHKA   | NDYRKSNNLE | LW-EERTHAE  |
| 651822_Ffastidiosum@YP_007827223     | NQAVAEALDG | LPPVKMHCSV | LAEEAIHAAL  | NDYRTKHGMA | AI-PMEKHDD  |
| 572547_Acolombiensis@YP_003553035    | NSAVAKALDG | LPPVKMHCSV | LAEEAIHGAI  | NDYRRQGLE  | PW-EDKSHDE  |
| 212717_Ctetani@NP_781697             | NKAVADALDG | LPPVKMHCSV | LAEEAIHKA   | NDYRESIGLE | PW-EMKVHSD  |
| 431943_Ckluveri@YP_001394709         | NKAVADALDG | LPPVKMHCSV | LAEEAIHKA   | NDYRESQGLE | PW-KICTHSE  |
| 573061_Ccellulovorans@YP_003843335   | NKAVAEALDG | LPPVKMHCSV | LAEEAIHKA   | NDYRVKNGLE | PI-ATEHSHD  |
| 508767_Cbotulinum@YP_001920515       | NKAVAEALDG | LPPVKMHCSV | LAEEAIHKA   | NDYRANGLD  | VI-PMKEHSD  |
| 931276_Csaccharoperbut@YP_007454264  | NKAVAEALDG | LPPVKMHCSV | LAEEAIHKA   | NDYRANGLD  | VI-PMKEHSD  |
| 290402_Cbeijerinckii@YP_001308237    | NKAVAEALDG | LPPVKMHCSV | LAEEAIHKA   | NDYRAKNGLE | VI-PMKEHSD  |
| 1345695_Csaccharobutyli@YP_008674363 | NKAVAEALDG | LPPVKMHCSV | LAEEAIHKA   | NDYRVNNGLE | AK-PMKEHSD  |
| 269797_Mbarkeri@YP_305925            | NKAVAEALDG | LPPVKMHCSV | LAEEAIHKA   | NDYLKCKGLE | PW-TE-----  |
| 188937_Macetivorans@NP_617616        | NKAVAEALDG | LPPVKMHCSV | LAEEAIHKA   | NDYROROGLE | PW-D-----   |
| 195103_Cperfringens@YP_696469        | NKAVAEALDG | LPPVKMHCSV | LAEEAIHKA   | NDYROROGLE | PW-DMKEHSH  |
| 593750_Mformicica@YP_007249963       | NKAVADALEG | LPPVKMHCSV | LAEEGIHKA   | NNYRKKQGLP | EW-EEKNHPS  |
| 456442_Mboonei@YP_001405283          | NKAVAEALNG | LPPVKMHCSV | LAEEGIHKA   | NDYRVKNGLE | PW-QETSSHA  |
| 521011_Mpalustris@YP_002466865       | NKAVAEALGG | LPPVKMHCSV | LAEEGIHKA   | NDYRVKNGLE | PI-PDPHAHA  |
| 323259_Mhungatei@YP_503638           | NKAVAEALEG | LPPVKMHCSV | LAEEGIHKA   | NDYRIKNGLE | PW-EKGGHT   |
| 547558_Mmahii@YP_003541558           | NKAVAEALEG | LPPVKMHCSV | LAEEGIHKA   | NDYREKQGLK | PI-EKPPDAE  |
| 644295_Mevestigatum@YP_003727500     | NKAVADALEG | LPSIKMHCSV | LAEEAIHKA   | NDYRQKONLP | LW-GEKEEEK  |
| 351627_Csaccharolyticu@YP_001181022  | NKAVAEALDG | LPAVKLHCSV | LAEEAIKAAI  | EDYLKCKQOQ | TO-N-----   |
| 521460_Cbescii@YP_002573580          | NKAVAEALDG | LPAVKLHCSV | LAEEAIKAAI  | EDYLSKQKSK | NT-N-----   |
| 632292_Chydrothermalis@YP_003992133  | NKAVAEALDG | LPAVKLHCSV | LAEEAIKAAI  | EDYLSKQKSK | NT-N-----   |
| 632348_Ckronotskyensis@YP_004023692  | NKAVAEALDG | LPAVKLHCSV | LAEEAIKAAI  | EDYLSKQKSK | NT-N-----   |
| 632335_Ckristjanssonii@YP_004026829  | NKAVAEALDG | LPAVKLHCSV | LAEEAIKAAI  | EDYLSKQKSK | NT-N-----   |
| 632516_Clactoaceticus@YP_004798736   | NKAVAEALDG | LPAVKLHCSV | LAEEAIKAAI  | EDYLSKQKSK | NT-N-----   |
| 608506_Cobsidiansis@YP_003840166     | NKAVAEALDG | LPAVKLHCSV | LAEEAIKAAI  | EDYLSKQKSK | NT-N-----   |
| 632518_Cowensensis@YP_004002802      | NKAVAEALDG | LPAVKLHCSV | LAEEAIKAAI  | EDYLSKQKSK | NT-N-----   |
| 1121335_[stercorarium@YP_007372524   | NKAVVEALDG | LPPAKLHCSV | LAEEAIAAAI  | ADYKRRHGLD | VE-NSECQGC  |
| 1121335_[stercorarium@YP_007678972   | NKAVVEALDG | LPPAKLHCSV | LAEEAIAAAI  | ADYKRRHGLD | VE-NSECQGC  |
| 755731_Csp@YP_005148252              | NKAVAEALDG | LPPAKMHCSV | LAEEAIAAAL  | TDYKRRNGLI | DP-NEGEDCT  |
| 394503_Ccellulolyticu@YP_002506259   | NKAVAEALDG | LPPAKMHCSV | LAEEAIAAAL  | TDYKRRNGLI | DS-NEGEDCT  |
| 720554_[clariflavum@YP_005046370     | NKAVAEALDG | LPPVKMHCSN | LAEEGIKAAI  | EDYLKKTGRL | SK-ECSEVC   |



|                                      |            |            |                         |             |             |
|--------------------------------------|------------|------------|-------------------------|-------------|-------------|
| 203119_Rthermocellum@YP_001037149    | NKAVAEALDG | LPPVKMHCSN | LAEEAIRAAI              | DDYRRKNGLL  | PE-GSENNAC  |
| 642492_Clentocellum@YP_004309737     | NKSVAEALDG | LPPVKMHCSL | LAEE <del>S</del> LHAAL | WDYAKKNNIT  | TE-GLKEPVA  |
| 1384484_Aequolifaciens@YP_008663926  | NKAVMEALDG | LPPVKVHCSL | LAEEAIHAAL              | WDYAEKNGIV  | TE-GLEKPVV  |
| 515619_Erectale@YP_002936246         | NKAVMEALDG | LPPVKVHCSL | LAEEAIHAAL              | WDYAEKNGIK  | TE-GLEKPVN  |
| 718255_Rintestinalis@YP_007780168    | NKAVMEALDG | LPPVKVHCSL | LAEEAIHAAL              | WDYAEKNGIK  | TE-GLERPVN  |
| 657315_Rintestinalis@YP_007830593    | NKAVMEALDG | LPPVKVHCSL | LAEEAIHAAL              | WDYAEKNGIK  | TE-GLERPVN  |
| 357809_Lpythofermentan@YP_001560003  | NKAVMEALDG | LPPVKVHCSL | LAEEAIHAAL              | WDYAEKNGIO  | TE-GLKKPKN  |
| 610130_[saccharolyticu@YP_003823446  | NGAVCEALDG | LPPVKVHCSL | LAEEAIHAAL              | WDYAEKNGIE  | ID-GLKKPKS  |
| 717608_[cf@YP_007849106              | NKAVMEALDG | LPPVKVHCSL | LAEEAIHAAL              | WDYAEKNGIK  | TE-GLEKPKS  |
| 245012_bproducing@YP_007810477       | NKAVMEALDG | LPPVKVHCSL | LAEEAIHAAL              | WDYAEKNGIK  | TE-GLEKPKS  |
| 657313_Rtorques@YP_007786815         | NKAVMEALDG | LPPVKVHCSL | LAEEAIHAAL              | WDYAEKHDIK  | TE-GLKKPKS  |
| 245018_bproducing@YP_007788847       | NKAVMEALDG | LPPVKVHCSL | LAEEAIHAAL              | WDYAEKNGIK  | TE-GLEKPKT  |
| 585394_Rhominis@YP_004837975         | NKAVMEALDG | LPPVKVHCSL | LAEEAIHAAL              | WDYAEKHNIK  | TE-GLEKPKN  |
| 1054217_Tarchaeon@YP_007688600       | NKAVMEALGG | LPPVKIHCSL | LAEEAIHAAL              | WDYACKNGIV  | TE-GLKAPKH  |
| 657323_Rsp@YP_007784833              | NKAVMEALDG | LPPVKIHCSL | LAEEAIHAAL              | WDYAEKHHIK  | TE-GLSKPKS  |
| 657314_Robeum@YP_007804234           | NKAVMEALDG | LPPVKVHCSL | LAEEAIHAAL              | WDYACKHGIV  | TE-GLDKPKS  |
| 717962_Ccatus@YP_007770008           | NKAVMEALDG | LPPVKVHCSL | LAEEAIHAAL              | WDYAEKNGIK  | TE-GLDKPKN  |
| 552811_Dlykanthroporep@YP_003758020  | NKAVADALGG | LPPVKMHCSV | LAEEALKKAI              | ENYYERQGEK  | PP-FETTPSS  |
| 246194_Chydrogenofoma@YP_361011      | NKAVADALDG | LPPQKMHCNS | LAADALKVAI              | EDYLKKKQK   | -----       |
| 696281_Druminis@YP_004546667         | NKSVAEALEG | LPPAKMHCSN | LAADALKAAI              | EDYLKKKQDR  | -----       |
| 868595_Dcarboxydivoran@YP_004497987  | NKAVAEALDG | LPPVKMHCSN | LAADALKAAI              | EDYLKKKQAA  | -----       |
| 349161_Dreducens@YP_001112128        | NKAVAEALEG | LPPAKMHCSN | LAADALKVAI              | EDYLKKKQNV  | -----       |
| 634498_Mruminantium@YP_003424309     | RNDVADALDG | LPPIKMHCSN | LAADALAEAI              | KDYKEKQEE   | -----       |
| 406327_Mvanniellii@YP_001322697      | KSDVADALDG | LPPVKMHCSN | LAADALHAAI              | ADYLEKCKIN  | P-----      |
| 679901_Mzhilinae@YP_004616912        | RDEVADELEG | LPPVKMHCSN | LAADGLHAAI              | EDYLKKKNDQ  | -----       |
| 224719_Msp@YP_008075510              | RKDVADELEG | LPPIKMHCSN | LAADALRAAI              | EDYRKKQDNT  | -----       |
| 339860_Mstadthanae@YP_448034         | RNDVADELDG | LPPIKLHCSN | LAADALQAAI              | ENYREKKEK   | EL-----     |
| 1295009_CMethanomassili@YP_008071572 | RNDVAGLGG  | LPEKKLHCSN | MAADALKAAI              | EDYKNKSA    | -----       |
| 420247_Msmithii@YP_001272836         | RNDVAEELDG | LPPVKMHCSN | LAADALKAAI              | DNYYEKSN    | -----       |
| 1041930_Mconradii@YP_005380864       | RKDVADELEG | LPPQKMHCNS | LAADGLKLA               | ENYRRKLQGL  | PP-KSGVTSG  |
| 304371_Mpaludicola@YP_003355464      | RNDVAKELEG | LPPQKMHCNS | LAADALKLA               | ENYRRKLQGL  | PP-RTGVTEG  |
| 1379702_Msp@YP_008915990             | RDDVAEELGG | LPPVKMHCSN | LAADALRAAI              | ADYKMKQAEK  | ET-ENSSSEK  |
| 351160_Marvoryzae@YP_686139          | RDDVAEELDG | LPPQKMHCNS | LAEEALTAAI              | EDYRKKQAAK  | K-----      |
| 990316_Mconcilii@YP_004384883        | RDDVAGELGG | LPPQKLHCSN | LGADALRAAI              | KDYWVVKIGKI | SP-CEAAVEE  |
| 521011_Mpalustris@YP_002466708       | RDDVADELDG | LPPRKMHCNS | LAADALHAAI              | EDYRKKTEG   | -----       |
| 1201294_Mbourgensis@YP_006544991     | RDDVAELEG  | LPPRKMHCNS | LAADALHAAI              | RDYLEKCKKA  | -----       |
| 368407_Mmarisnigri@YP_001048051      | RDDVAEELDG | LPPRKMHCNS | LAADALHAAI              | EDYREKQKKE  | -----       |
| 635013_Tpotens@YP_003640662          | NKAVAEALGG | LPPQKMHCNS | LAADALHAAI              | EDYKNKAAGG  | Q-----      |
| 457570_Nthermophilus@YP_001916489    | NKDVAEELDG | LPPKMLHCSN | LAADALTKAI              | KNYLGEEDDE  | EQ-EHEDESN  |
| 574087_Aarabaticum@YP_003827335      | NSEVAEALDG | LPEKMHCSN  | LAADALONAI              | NNYKGIEDDD  | VC-THCEDIS  |
| 748449_Hhalobius@YP_007315822        | NEAVAEALGG | LPAQKMHCNS | LAADALQKAI              | DDYLGIEREY  | EE-----     |
| 338963_Pcarbinolicum@YP_006717600    | NDDVADALGG | LPAQKLHCSN | LAADALHEAI              | KNYQETNA    | -----       |
| 498761_Hmodesticulum@YP_001680434    | NRAVADALGG | LPPQKMHCNS | LAADALHAAI              | ADYKAKQEA   | R-----      |
| 768704_Dmeridiei@YP_006620851        | NKAVAEALGG | LPEKMHCSN  | LAADALHAAI              | ENYRDNHOKK  | E-----      |
| 768706_Dorientis@YP_004969159        | NAVAEALGG  | LPPAKMHCSN | LAADALHEAI              | KNYRDKQKKE  | -----       |
| 1147129_Dsp@YP_006909410             | NAVAEALGG  | LPEAKLHCSN | LAADAVHEAI              | KDYICCKTKV  | -----       |
| 138119_Dhafniense@YP_518658          | NAVAEALDG  | LPPAKMHCSN | LAADALHAAI              | KDYKEKTLV   | -----       |
| 645991_Sglycolicus@YP_004266248      | NAVAEALDG  | LPPVKMHCSN | LAADAVHAAI              | KDYHEKQKTKV | -----       |
| 646529_Dacidiphilus@YP_006467680     | NAVAEALGG  | LPPAKMHCSN | LAADALHAAI              | KDYHEKQKKE  | E-----      |
| 272564_Dhafniense@YP_002460033       | NAVAEALDG  | LPPAKMHCSN | LAADALHEAI              | KNYHEKTLKV  | -----       |
| 756499_Ddehalogenans@YP_006431093    | NAVAEALDG  | LPPAKMHCSN | LAADALHEAI              | KDYHCKTLKV  | -----       |
| 871963_Ddichloroelimin@YP_007221311  | NAVAEALDG  | LPPAKMHCSN | LAADALHEAI              | KDYHEKHKAK  | -----       |
| 767817_Dgibsoniae@YP_007945765       | NKAVAEALGG | LPPKMLHCSN | LAADALHAAI              | EDYRSKQK    | -----       |
| 485916_Dacetoxidans@YP_003191710     | NAVAEALDG  | LPPKMHCSN  | LAADALHAAI              | KDYQEKHKSA  | -----       |
| 555079_Toceani@YP_003825515          | NKAVADALGG | LPPVKMHCSN | LAADALHAAI              | EDYKMKKESK  | NVVEQK----- |
| 349307_Mthermophila@YP_843171        | RNDVADALDG | LPPQKMHCNS | LAADALHAAI              | NDYLSKCKKH  | -----       |
| 760568_Dkuznetsovii@YP_004517387     | NKQVAEALDG | LPPQKMHCNS | LAADALHAAI              | QDYLSKCKKKE | A-----      |
| 373903_Horenii@YP_002508640          | KETVAEALDG | LPSNKMHCNS | LAADALHAAI              | KSYNKKDNSD  | NS-GKENDTL  |
| 370438_Pthermopropioni@YP_001211605  | NKHVADMLGG | LPPQKMHCNS | LAADALYKAI              | EDYKSRQAG   | -----       |
| 264732_Mthermoacetica@YP_430496      | NKAVAEALDG | LPPQKMHCNS | LAADALHAAI              | EDYONRNKKA  | S-----      |
| 96561_Doleovorans@YP_001528642       | NKDVAEALGG | LPPKMLHCSN | LGADALQMAI              | KDYEDRCKAGK | VR-PELKRKE  |
| 471821_uTermite@YP_001956213         | NADVAKALGG | LPSNKMHCNS | LGADALHAAI              | ENYNSKQV    | -----       |
| 429009_Adegensii@YP_003238425        | NKDVAEALGG | LPPQKLHCSN | LGADALHAAI              | EDYLARKKEX  | EA-GDDGNKP  |
| 706587_Dtiedjei@YP_006449617         | NKVIDALNG  | LPPKMLHCSN | LGADALHAAI              | EDYRSKCKGK  | TA-ERPLDGP  |
| 589924_Fplacidus@YP_003435557        | KKTVAEALGG | LPPQKMHCNS | LAEEALKRAI              | ADYLKCKQRI  | DE-LKRLGLD  |
| 224325_Afulgidus@NP_069024           | RDAVAEALGG | LPPQKMHCNS | LAADALRAAI              | VDFYRKNKGI  | DK-IKELGLE  |
| 224325_Afulgidus@NP_069399           | RDAVAEALGG | LPPQKMHCNS | LAADALRAAI              | VDFYRKNKGI  | DK-IKELGLE  |
| 416591_Tlettingae@YP_001470347       | WKDIVERLGG | LPPVKYHCSN | LAVDTLRKA               | KEYEESLARK  | -----       |
| 688269_Tthermarum@YP_004660083       | WKDIVERLGG | LPPVKYHCSN | LAVDTLRKA               | EYKSLARK    | -----       |
| 374847_CKorarchaeum@YP_001737319     | WQVIAEALGG | LPPVKKHCSI | LAVGALRAAI              | RRYFGD--NL  | PE-WLPKDLT  |
| 583356_Iaggregans@YP_003860035       | WQVIAEALGG | LPPVKKHCSI | LAVGALRAAI              | RAYKCKIGEH  | PE-WLPKELV  |
| 272947_Rprowazekii@NP_220862         | NTEIAKEL-S | LPPVKLHCSL | LAEDAIIKAAI             | ADYKCKRENK  | KD-S-----   |
| 1282356_Ppoeae@YP_007398800          | NTQIAEEL-A | LPPVKIHCSV | LAEDAIIKAAV             | RDYKCKKGLI  | -----       |
| 994484_Pbrassicacearum@YP_004352099  | NTQIAEEL-A | LPPVKIHCSV | LAEDAIIKAAV             | RDYKCKKGLI  | -----       |
| 882944_Languillarum@YP_008488748     | NSEIAEEL-E | LPPVKVHCSI | LAEDAIIKAAV             | ADYKCKHQ    | -----       |
| 1167634_Axylosoxidans@YP_008032542   | NTQIAEEL-A | LPPVKVHCSI | LAEDAIIKAAV             | QNYKEKHSVP  | AE-AVAS---  |
| 257311_Bparapertussis@NP_884287      | NTQIAEEL-A | LPPVKIHCSI | LAEDAIIKAAV             | QDYKTKHGAE  | TP-EAFAAN-  |
| 1017264_Bpertussis@YP_005589900      | NTQIAEEL-A | LPPVKIHCSI | LAEDAIIKAAV             | QDYKTKHGAE  | TP-EAFAAN-  |
| 284812_Spombe@NP_592967              | NTQIAKEL-C | LPPVKLHCSM | LAEDAIIKAAV             | KHYRKKGLTP  | VG-TTAGAIE  |
| 559292_Scerevisiae@NP_014869         | NTEIAKEL-S | LPPVKLHCSM | LAEDAIIKAAI             | KDYKTKRNPS  | VILH-----   |
| 559292_Scerevisiae@NP_015190         | NTEIAKEL-S | LPPVKLHCSM | LAEDAIIKAAI             | KDYKSKRNTP  | TM-LS-----  |
| 9606_Hsapiens@NP_998760              | NTDIAKEL-C | LPPVKLHCSM | LAEDAIIKAAI             | ADYKLLQEPK  | KG-EAEKK--  |
| 9606_Hsapiens@NP_055116              | NTDIAKEL-C | LPPVKLHCSM | LAEDAIIKAAI             | ADYKLLQEPK  | KG-EAEKK--  |
| 3702_Athaliana@NP_193953             | NTEIAKHL-S | LPPVKLHCSM | LAEDAIIKAAV             | KDYKEKRVKT  | NG-AAAAGET  |
| 3702_Athaliana@NP_192317             | NSQIAKHL-S | LPPVKLHCSM | LAEDAIIKAAI             | KNYKEKQDKA  | NG-ETVETID  |
| 3702_Athaliana@NP_186751             | NTEIAKHL-R | LPPVKLHCSM | LAEDAIIKAAV             | RDYKEKQAKT  | NA-AAAEEIV  |
| 7227_Dmelanogaster@NP_649840         | NTDIAKEL-R | LPPVKLHCSM | LAEDAIIKAAI             | KDYKVKQCKK  | VA-N-----   |
| 6239_Celegans@NP_502658              | NDEIAKEL-C | LPPVKLHCSM | LAQDAIQAAI              | ADYKCKQTKK  | A-----      |

|                                      |                 |       |       |       |
|--------------------------------------|-----------------|-------|-------|-------|
| 243233_Mcapsulatus@YP_112782         | -AA             | ----- | ----- | ----- |
| 458817_Shelifaxensis@YP_001673798    |                 | ----- | ----- | ----- |
| 398579_Spealeana@YP_001501349        |                 | ----- | ----- | ----- |
| 557598_Lhongkongensis@YP_002796852   |                 | ----- | ----- | ----- |
| 521006_Ngonorrhoeae@YP_002001906     |                 | ----- | ----- | ----- |
| 489653_Nlactamica@YP_004048810       |                 | ----- | ----- | ----- |
| 935589_Nmeningitidis@YP_005903962    |                 | ----- | ----- | ----- |
| 395495_Lcholodnii@YP_001790394       | -KAAA           | ----- | ----- | ----- |
| 999541_Bgladioli@YP_004361365        |                 | ----- | ----- | ----- |
| 983917_Rgelatinosus@YP_005439140     | -SPSSPDQQH SEAA | ----- | ----- | ----- |
| 1416914_Ppnomenusa@YP_008837319      |                 | ----- | ----- | ----- |
| 1380774_Psp@YP_008881415             |                 | ----- | ----- | ----- |
| 1249661_Bthailandensis@YP_007917844  |                 | ----- | ----- | ----- |
| 320388_Bmallei@YP_993528             |                 | ----- | ----- | ----- |
| 536230_Bpseudomallei@YP_002897469    |                 | ----- | ----- | ----- |
| 395019_Bmultivorans@YP_001579332     |                 | ----- | ----- | ----- |
| 626418_Bglumae@YP_002912250          |                 | ----- | ----- | ----- |
| 365044_Pnaphthalenivor@YP_981803     | -QPVCASSTP APTL | ----- | ----- | ----- |
| 266265_Bxenovorans@YP_553871         | -ADQPVCSN PN    | ----- | ----- | ----- |
| 269482_Bvietnamiensis@YP_001115172   | -VCTSTPN        | ----- | ----- | ----- |
| 583345_Mmobilis@YP_003049105         |                 | ----- | ----- | ----- |
| 666681_Mversatilis@YP_003674921      |                 | ----- | ----- | ----- |
| 391038_Bphymatum@YP_001857685        |                 | ----- | ----- | ----- |
| 398577_Bambifaria@YP_001808732       |                 | ----- | ----- | ----- |
| 269482_Bvietnamiensis@YP_001120041   |                 | ----- | ----- | ----- |
| 406425_Bcenocepacia@YP_001765425     |                 | ----- | ----- | ----- |
| 1009846_Bcepacia@YP_006615433        |                 | ----- | ----- | ----- |
| 482957_Blata@YP_369669               |                 | ----- | ----- | ----- |
| 748280_Psp@YP_004848592              |                 | ----- | ----- | ----- |
| 1229205_Bphenoliruptrix@YP_006834626 |                 | ----- | ----- | ----- |
| 1163617_Sdenitrificans@YP_008546117  | -DCSK           | ----- | ----- | ----- |
| 266265_Bxenovorans@YP_559453         |                 | ----- | ----- | ----- |
| 398527_Bphytofirmans@YP_001896197    |                 | ----- | ----- | ----- |
| 375286_Jsp@YP_001352943              |                 | ----- | ----- | ----- |
| 204773_Harsenicoxydans@YP_001100494  |                 | ----- | ----- | ----- |
| 580332_Slithotrophicus@YP_003524869  | -K              | ----- | ----- | ----- |
| 159087_Daromatica@YP_285167          |                 | ----- | ----- | ----- |
| 882378_Brhizoxinica@YP_004029636     | -EAAA           | ----- | ----- | ----- |
| 85643_Tsp@YP_002355840               |                 | ----- | ----- | ----- |
| 757424_Hseropedicae@YP_003776230     | -PKOYPICAP IAD  | ----- | ----- | ----- |
| 522306_Caccumulibacter@YP_003167247  |                 | ----- | ----- | ----- |
| 76114_Aaromaticum@YP_160687          |                 | ----- | ----- | ----- |
| 381666_Reutropha@YP_725668           |                 | ----- | ----- | ----- |
| 977880_Ctaiwanensis@YP_002005171     |                 | ----- | ----- | ----- |
| 1042878_Cnecator@YP_004684939        |                 | ----- | ----- | ----- |
| 266264_Cmetallidurans@YP_583181      |                 | ----- | ----- | ----- |
| 395494_Gcapsiferiform@YP_003846450   | -C              | ----- | ----- | ----- |
| 859655_Rsolanacearum@YP_005996961    |                 | ----- | ----- | ----- |
| 402626_Rpickettii@YP_001898467       |                 | ----- | ----- | ----- |
| 543913_bproteobacteriu@YP_007502653  |                 | ----- | ----- | ----- |
| 62928_Asp@YP_933519                  |                 | ----- | ----- | ----- |
| 640081_Dsuillum@YP_005028573         |                 | ----- | ----- | ----- |
| 452638_Pnecessarius@YP_001797351     |                 | ----- | ----- | ----- |
| 292415_Tdenitrificans@YP_314923      |                 | ----- | ----- | ----- |
| 265072_Mflagellatus@YP_544916        |                 | ----- | ----- | ----- |
| 582744_Mglucosetrophus@YP_003051619  |                 | ----- | ----- | ----- |
| 887061_Msp@YP_004040241              |                 | ----- | ----- | ----- |
| 891398_CTremblaya@YP_004707015       |                 | ----- | ----- | ----- |
| 426114_Tarsenitoxydans@YP_003623866  | -AQAA           | ----- | ----- | ----- |
| 75379_Tintermedia@YP_003642782       | -AQAA           | ----- | ----- | ----- |
| 937774_Tequigenitalis@YP_004130301   |                 | ----- | ----- | ----- |
| 1008459_Tasinigenitalis@YP_004874474 |                 | ----- | ----- | ----- |
| 634503_Eictaluri@YP_002934567        |                 | ----- | ----- | ----- |
| 718251_Etarda@YP_005700147           |                 | ----- | ----- | ----- |
| 259536_Parcticus@YP_264760           |                 | ----- | ----- | ----- |
| 335284_Pcryohalolentis@YP_580918     |                 | ----- | ----- | ----- |
| 571800_Psp@YP_008163576              |                 | ----- | ----- | ----- |
| 420662_Mpetroleiphilum@YP_001021452  |                 | ----- | ----- | ----- |
| 243365_Cviolaceum@NP_900763          |                 | ----- | ----- | ----- |
| 1208919_CKinetoplastiba@YP_007459239 |                 | ----- | ----- | ----- |
| 983545_Gsp@YP_004435367              |                 | ----- | ----- | ----- |
| 342610_Patlantica@YP_660819          |                 | ----- | ----- | ----- |
| 743299_Aferrivorans@YP_004783591     | -SAQAAH         | ----- | ----- | ----- |
| 243159_Aferrooxidans@YP_002425162    | -CAQAAH         | ----- | ----- | ----- |
| 1005048_Cfungivorans@YP_004753777    |                 | ----- | ----- | ----- |
| 669502_CProffftella@YP_008343646     |                 | ----- | ----- | ----- |
| 757424_Hseropedicae@YP_003776535     |                 | ----- | ----- | ----- |
| 395495_Lcholodnii@YP_001790080       |                 | ----- | ----- | ----- |
| 257310_Bbronchiseptica@NP_888820     |                 | ----- | ----- | ----- |
| 990288_Acaldus@YP_004748177          | -AASH           | ----- | ----- | ----- |
| 990288_Acaldus@YP_004748110          |                 | ----- | ----- | ----- |
| 983917_Rgelatinosus@YP_005436383     |                 | ----- | ----- | ----- |
| 360910_Bavium@YP_786035              |                 | ----- | ----- | ----- |
| 1036672_Akashmirensis@YP_006379415   |                 | ----- | ----- | ----- |
| 340100_Bpetrii@YP_001631386          | -AAVAN          | ----- | ----- | ----- |
| 523791_Kkoreensis@YP_003146685       |                 | ----- | ----- | ----- |
| 156889_Mmarinus@YP_866958            |                 | ----- | ----- | ----- |

|                                      |      |         |      |     |     |     |     |     |
|--------------------------------------|------|---------|------|-----|-----|-----|-----|-----|
| 404589_Asp@YP_001377835              | -GDR | AELLER  | GVLK | SGI | --- | --- | --- | --- |
| 290397_Adehalogenans@YP_463806       | -GDR | SALIEK  | GVLK | SGI | --- | --- | --- | --- |
| 447217_Asp@YP_002132996              | -GDR | SALIEK  | GVLK | SGI | --- | --- | --- | --- |
| 455488_Adehalogenans@YP_002491042    | -GDR | SALIEK  | GVLK | SGI | --- | --- | --- | --- |
| 378806_Saurantiaca@YP_003955403      |      |         |      |     | --- | --- | --- | --- |
| 246197_Mxanthus@YP_633158            |      |         |      |     | --- | --- | --- | --- |
| 483219_Mfulvus@YP_004669542          |      |         |      |     | --- | --- | --- | --- |
| 1144275_Ccoralloides@YP_005368444    |      |         |      |     | --- | --- | --- | --- |
| 1278073_Mstipitatus@YP_007362455     |      |         |      |     | --- | --- | --- | --- |
| 448385_Scellulosum@YP_001617979      | -VP  | AAAAATA | SAE  |     | --- | --- | --- | --- |
| 399739_Pmendocina@YP_001188990       |      |         |      |     | --- | --- | --- | --- |
| 1294143_Pdenitrificans@YP_007659193  |      |         |      |     | --- | --- | --- | --- |
| 208964_Paeruginosa@NP_252502         |      |         |      |     | --- | --- | --- | --- |
| 322710_Avinelandii@YP_002801150      |      |         |      |     | --- | --- | --- | --- |
| 644801_Pstutzeri@YP_007239445        |      |         |      |     | --- | --- | --- | --- |
| 1207075_Psp@YP_007027941             |      |         |      |     | --- | --- | --- | --- |
| 1114970_Pfluorescens@YP_005206437    |      |         |      |     | --- | --- | --- | --- |
| 220664_Pprotogens@YP_262044          |      |         |      |     | --- | --- | --- | --- |
| 351746_Pputida@YP_001266219          |      |         |      |     | --- | --- | --- | --- |
| 1435058_Pmonteilii@YP_008958359      |      |         |      |     | --- | --- | --- | --- |
| 743720_Pfulva@YP_004475358           |      |         |      |     | --- | --- | --- | --- |
| 264730_Psyringae@YP_273568           |      |         |      |     | --- | --- | --- | --- |
| 384676_Pentomophila@YP_606728        |      |         |      |     | --- | --- | --- | --- |
| 1430440_Mgryphiswaldens@YP_008937260 |      |         |      |     | --- | --- | --- | --- |
| 749219_Mcatarrhalis@YP_003626770     |      |         |      |     | --- | --- | --- | --- |
| 62977_Asp@YP_046090                  |      |         |      |     | --- | --- | --- | --- |
| 436717_Aoleivorans@YP_003732380      |      |         |      |     | --- | --- | --- | --- |
| 400667_Abaumannii@YP_001084660       |      |         |      |     | --- | --- | --- | --- |
| 871585_Acalcoaceticus@YP_004995269   |      |         |      |     | --- | --- | --- | --- |
| 511062_Osp@YP_005091814              |      |         |      |     | --- | --- | --- | --- |
| 318167_Sfrigidimarina@YP_751106      |      |         |      |     | --- | --- | --- | --- |
| 326297_Samazonensis@YP_927171        |      |         |      |     | --- | --- | --- | --- |
| 318161_Sdenitrificans@YP_562467      |      |         |      |     | --- | --- | --- | --- |
| 167879_Cpsychrerythrae@YP_267876     |      |         |      |     | --- | --- | --- | --- |
| 637905_Sviolacea@YP_003556341        |      |         |      |     | --- | --- | --- | --- |
| 225849_Spiezotolerans@YP_002311055   |      |         |      |     | --- | --- | --- | --- |
| 323850_Sloihica@YP_001094441         |      |         |      |     | --- | --- | --- | --- |
| 425104_Ssediminis@YP_001474605       |      |         |      |     | --- | --- | --- | --- |
| 392500_Swoodyi@YP_001760156          |      |         |      |     | --- | --- | --- | --- |
| 60481_Ssp@YP_737869                  |      |         |      |     | --- | --- | --- | --- |
| 211586_Soneidensis@NP_717861         |      |         |      |     | --- | --- | --- | --- |
| 693973_Sbaltica@YP_005273706         |      |         |      |     | --- | --- | --- | --- |
| 399804_Sputrefaciens@YP_006009782    |      |         |      |     | --- | --- | --- | --- |
| 298386_Sprofundum@YP_128966          |      |         |      |     | --- | --- | --- | --- |
| 28173_Vnigripulchritu@YP_008621944   |      |         |      |     | --- | --- | --- | --- |
| 1219076_Valginolyticus@YP_008537102  |      |         |      |     | --- | --- | --- | --- |
| 150340_Vsp@YP_003286982              |      |         |      |     | --- | --- | --- | --- |
| 345073_Vcholerae@YP_001216234        |      |         |      |     | --- | --- | --- | --- |
| 223926_Vparahaemolytic@NP_796976     |      |         |      |     | --- | --- | --- | --- |
| 882102_Vanguillarum@YP_004566935     |      |         |      |     | --- | --- | --- | --- |
| 575788_Vsplendidus@YP_002416251      |      |         |      |     | --- | --- | --- | --- |
| 1129794_Vpsychrophila@YP_007545568   |      |         |      |     | --- | --- | --- | --- |
| 196600_Vvulnificus@NP_933549         |      |         |      |     | --- | --- | --- | --- |
| 903510_Vfurnissii@YP_004993913       |      |         |      |     | --- | --- | --- | --- |
| 338187_Vcampbellii@YP_001444276      |      |         |      |     | --- | --- | --- | --- |
| 338187_Vcampbellii@YP_008526292      |      |         |      |     | --- | --- | --- | --- |
| 314282_Psp@YP_007639631              |      |         |      |     | --- | --- | --- | --- |
| 357804_Pingrahamii@YP_942749         |      |         |      |     | --- | --- | --- | --- |
| 326442_Phaloplanktis@YP_341160       |      |         |      |     | --- | --- | --- | --- |
| 234831_Psp@YP_004067531              |      |         |      |     | --- | --- | --- | --- |
| 595494_Tauensis@YP_002893203         |      |         |      |     | --- | --- | --- | --- |
| 396588_Tsulfidiphilus@YP_002513559   |      |         |      |     | --- | --- | --- | --- |
| 396588_Tsulfidiphilus@YP_002514125   |      |         |      |     | --- | --- | --- | --- |
| 998088_Averonii@YP_004393031         |      |         |      |     | --- | --- | --- | --- |
| 380703_Ahydrophila@YP_856284         |      |         |      |     | --- | --- | --- | --- |
| 382245_Asalmonicida@YP_001142383     |      |         |      |     | --- | --- | --- | --- |
| 342108_Mmagneticum@YP_422390         |      |         |      |     | --- | --- | --- | --- |
| 1245471_Presinovorans@YP_008101472   |      |         |      |     | --- | --- | --- | --- |
| 365044_Pnaphthalenivor@YP_982518     |      |         |      |     | --- | --- | --- | --- |
| 296591_Psp@YP_549004                 |      |         |      |     | --- | --- | --- | --- |
| 232721_Asp@YP_986388                 |      |         |      |     | --- | --- | --- | --- |
| 535289_Aebreus@YP_002553097          |      |         |      |     | --- | --- | --- | --- |
| 365046_Rtataouinensis@YP_004618947   |      |         |      |     | --- | --- | --- | --- |
| 946483_CSymbiobacter@YP_008681130    |      |         |      |     | --- | --- | --- | --- |
| 312309_Vfischeri@YP_204001           |      |         |      |     | --- | --- | --- | --- |
| 595537_Vparadoxus@YP_004156043       | -H   |         |      |     | --- | --- | --- | --- |
| 316275_Asalmonicida@YP_002262235     |      |         |      |     | --- | --- | --- | --- |
| 391735_Veiseniae@YP_997138           |      |         |      |     | --- | --- | --- | --- |
| 397945_Acitrullii@YP_970793          |      |         |      |     | --- | --- | --- | --- |
| 643561_Aavenae@YP_004235248          |      |         |      |     | --- | --- | --- | --- |
| 398578_Dacidovorans@YP_001565014     |      |         |      |     | --- | --- | --- | --- |
| 742013_Dsp@YP_004488168              |      |         |      |     | --- | --- | --- | --- |
| 338969_Aferrireducens@YP_523433      |      |         |      |     | --- | --- | --- | --- |
| 596154_Adenitrificans@YP_004388278   |      |         |      |     | --- | --- | --- | --- |
| 688245_Ctestosteroni@YP_003278774    |      |         |      |     | --- | --- | --- | --- |
| 1266738_Pmirabilis@YP_008398502      |      |         |      |     | --- | --- | --- | --- |
| 1124991_Mmorganii@YP_007505117       |      |         |      |     | --- | --- | --- | --- |
| 406817_Xnematophila@YP_003713469     |      |         |      |     | --- | --- | --- | --- |



|                                      |      |      |      |      |
|--------------------------------------|------|------|------|------|
| 291112_Pasymbiotica@YP_003040200     | ---- | ---- | ---- | ---- |
| 243265_Pluminescens@NP_930506        | ---- | ---- | ---- | ---- |
| 406818_Xbovienii@YP_003468915        | ---- | ---- | ---- | ---- |
| 273123_Ypseudotubercul@YP_071365     | ---- | ---- | ---- | ---- |
| 393305_Yenterocolitica@YP_001005390  | ---- | ---- | ---- | ---- |
| 1346614_Sliquefaciens@YP_008231656   | ---- | ---- | ---- | ---- |
| 1348660_Splymuthica@YP_008160622     | ---- | ---- | ---- | ---- |
| 399741_Sproteamaculans@YP_001479850  | ---- | ---- | ---- | ---- |
| 1249634_Smarcescens@YP_007345780     | ---- | ---- | ---- | ---- |
| 187410_Ypestis@NP_668657             | ---- | ---- | ---- | ---- |
| 1157951_Pstuartii@YP_006215182       | ---- | ---- | ---- | ---- |
| 344609_Sboydii@YP_001881320          | ---- | ---- | ---- | ---- |
| 104623_Ssp@YP_008524031              | ---- | ---- | ---- | ---- |
| 561229_Dzeae@YP_003003456            | ---- | ---- | ---- | ---- |
| 590409_Ddadantii@YP_003334610        | ---- | ---- | ---- | ---- |
| 561230_Pcarotovorum@YP_003018589     | ---- | ---- | ---- | ---- |
| 561231_Pwasabiae@YP_003258666        | ---- | ---- | ---- | ---- |
| 1166016_Psp@YP_006282128             | ---- | ---- | ---- | ---- |
| 218491_Patrosepticum@YP_051325       | ---- | ---- | ---- | ---- |
| 99287_Senterica@NP_461477            | ---- | ---- | ---- | ---- |
| 218493_Sbongori@YP_004731144         | ---- | ---- | ---- | ---- |
| 290339_Csakazakii@YP_001436836       | ---- | ---- | ---- | ---- |
| 693216_Cturicensis@YP_003211492      | ---- | ---- | ---- | ---- |
| 399742_Esp@YP_001177741              | ---- | ---- | ---- | ---- |
| 640513_Easburiae@YP_004829762        | ---- | ---- | ---- | ---- |
| 693444_Ebacterium@YP_007339349       | ---- | ---- | ---- | ---- |
| 290338_Ckoseri@YP_001451852          | ---- | ---- | ---- | ---- |
| 484021_Kpneumoniae@YP_002920722      | ---- | ---- | ---- | ---- |
| 637910_Crodentium@YP_003366009       | ---- | ---- | ---- | ---- |
| 640131_Kvariicola@YP_003438138       | ---- | ---- | ---- | ---- |
| 1191061_Koxytoca@YP_006500071        | ---- | ---- | ---- | ---- |
| 1286170_Rornithinolytic@YP_007872306 | ---- | ---- | ---- | ---- |
| 511145_Ecoli@NP_417024               | ---- | ---- | ---- | ---- |
| 585054_Efergusonii@YP_002381825      | ---- | ---- | ---- | ---- |
| 198214_Sflexneri@NP_708368           | ---- | ---- | ---- | ---- |
| 216599_Ssonnei@YP_005457544          | ---- | ---- | ---- | ---- |
| 300267_Sdysenteriae@YP_404261        | ---- | ---- | ---- | ---- |
| 716541_Ecloacae@YP_003614361         | ---- | ---- | ---- | ---- |
| 701347_Elignolyticus@YP_003940771    | ---- | ---- | ---- | ---- |
| 630626_Sblattae@YP_006318650         | ---- | ---- | ---- | ---- |
| 1028307_Eaerogenes@YP_004590373      | ---- | ---- | ---- | ---- |
| 557723_Hparasuis@YP_002474707        | ---- | ---- | ---- | ---- |
| 1005058_Ganatis@YP_004420698         | ---- | ---- | ---- | ---- |
| 1075089_Pmultocida@YP_005176279      | ---- | ---- | ---- | ---- |
| 205914_Hsomnus@YP_718490             | ---- | ---- | ---- | ---- |
| 1171377_Btrehalosi@YP_007548422      | ---- | ---- | ---- | ---- |
| 233412_Hducreyi@NP_873560            | ---- | ---- | ---- | ---- |
| 416269_Apleuropneumoni@YP_001053631  | ---- | ---- | ---- | ---- |
| 696748_Asuis@YP_006816777            | ---- | ---- | ---- | ---- |
| 1366053_Mhaemolytica@YP_008338465    | ---- | ---- | ---- | ---- |
| 1334187_Hinfluenzae@YP_008544790     | ---- | ---- | ---- | ---- |
| 634176_Aaphrophilus@YP_003007650     | ---- | ---- | ---- | ---- |
| 694569_Aactinomycetemc@YP_006286355  | ---- | ---- | ---- | ---- |
| 862965_Hparainfluenzae@YP_004822800  | ---- | ---- | ---- | ---- |
| 221988_Msucciniciprodu@YP_088916     | ---- | ---- | ---- | ---- |
| 339671_Asuccinogenes@YP_001344170    | ---- | ---- | ---- | ---- |
| 550540_Fbalearica@YP_003914035       | ---- | ---- | ---- | ---- |
| 396595_Tsp@YP_003460082              | ---- | ---- | ---- | ---- |
| 413404_CRuthia@YP_903798             | ---- | ---- | ---- | ---- |
| 412965_CVesicomysociu@YP_001219373   | ---- | ---- | ---- | ---- |
| 1208921_CKinetoplastiba@YP_007448562 | ---- | ---- | ---- | ---- |
| 561501_Baphidicola@YP_002468877      | ---- | ---- | ---- | ---- |
| 357244_Otsutsugamushi@YP_001248706   | ---- | ---- | ---- | ---- |
| 1003201_Rtyphi@YP_005427548          | ---- | ---- | ---- | ---- |
| 1105111_CRickettsia@YP_005365544     | ---- | ---- | ---- | ---- |
| 272944_Rconorii@NP_360366            | ---- | ---- | ---- | ---- |
| 452659_Rrickettsii@YP_001650107      | ---- | ---- | ---- | ---- |
| 347255_Rafricae@YP_002845312         | ---- | ---- | ---- | ---- |
| 562019_Rpeacockii@YP_002916645       | ---- | ---- | ---- | ---- |
| 1105113_Rrhipicephali@YP_005390607   | ---- | ---- | ---- | ---- |
| 416276_Rmassiliae@YP_001499486       | ---- | ---- | ---- | ---- |
| 1105108_Rparkeri@YP_005392983        | ---- | ---- | ---- | ---- |
| 1105114_Rmontanensis@YP_005391246    | ---- | ---- | ---- | ---- |
| 1032845_Rheilongjiangen@YP_004764467 | ---- | ---- | ---- | ---- |
| 652620_Rjaponica@YP_004884928        | ---- | ---- | ---- | ---- |
| 481009_Rphilipii@YP_005300823        | ---- | ---- | ---- | ---- |
| 1105109_Rslovaca@YP_005426472        | ---- | ---- | ---- | ---- |
| 1105107_Rcanadensis@YP_005299497     | ---- | ---- | ---- | ---- |
| 336407_Rbellii@YP_538116             | ---- | ---- | ---- | ---- |
| 315456_Rfelis@YP_246860              | ---- | ---- | ---- | ---- |
| 293614_Rakari@YP_001493572           | ---- | ---- | ---- | ---- |
| 1105110_Raustralis@YP_005414962      | ---- | ---- | ---- | ---- |
| 434131_Nristicii@YP_003081518        | ---- | ---- | ---- | ---- |
| 222891_Nsennetsu@YP_506192           | ---- | ---- | ---- | ---- |
| 330214_CNitrospira@YP_003799619      | ---- | ---- | ---- | ---- |
| 984262_Sgrandis@YP_005322201         | ---- | ---- | ---- | ---- |
| 100901_Wendosymbiont@YP_006555868    | ---- | ---- | ---- | ---- |
| 66084_Wsp@YP_002727379               | ---- | ---- | ---- | ---- |

TDNKS  
TENKS

|                                       |              |            |      |      |
|---------------------------------------|--------------|------------|------|------|
| 1423892_Emuris@YP_008929080           | ----         | ----       | ---- | ---- |
| 574556_Acentrale@YP_003328545         | ----         | ----       | ---- | ---- |
| 320483_Amarginale@YP_002563600        | ----         | ----       | ---- | ---- |
| 1184253_Aphagocytophilu@YP_008332775  | ----         | ----       | ---- | ---- |
| 205920_Echaffeensis@YP_507440         | ----         | ----       | ---- | ---- |
| 254945_Eruminantium@YP_180281         | ----         | ----       | ---- | ---- |
| 254945_Eruminantium@YP_197308         | ----         | ----       | ---- | ---- |
| 269484_Ecanis@YP_303050               | -E-          | ----       | ---- | ---- |
| 517418_Cthalassium@YP_001997584       | ----         | ----       | ---- | ---- |
| 485917_Pheparinus@YP_003091837        | ----         | ----       | ---- | ---- |
| 762903_Psaltans@YP_004273747          | ----         | ----       | ---- | ---- |
| 929556_Scanadensis@YP_006255074       | ----         | ----       | ---- | ---- |
| 760192_Hhydrossis@YP_004446110        | ----         | ----       | ---- | ---- |
| 1162668_Lferrooxidans@YP_005469656    | ----         | ----       | ---- | ---- |
| 1048260_Lferriphilum@YP_006765680     | ----         | ----       | ---- | ---- |
| 240015_Acapsulatum@YP_002755573       | -AAC-        | ----       | ---- | ---- |
| 204669_CKoribacter@YP_589562          | ----         | ----       | ---- | ---- |
| 1198114_Gtundricola@YP_004219465      | -AH-         | ----       | ---- | ---- |
| 926566_Troseus@YP_006423699           | -SA-         | ----       | ---- | ---- |
| 401053_Tsaanensis@YP_004180969        | -AVN-        | ----       | ---- | ---- |
| 682795_Gmallensis@YP_005055878        | -H-          | ----       | ---- | ---- |
| 696127_CMidichloria@YP_004679282      | ----         | ----       | ---- | ---- |
| 871271_CZindieria@YP_003878048        | ----         | ----       | ---- | ---- |
| 657324_Bfibrisolvens@YP_007819038     | -EVE SCHMH-  | ----       | ---- | ---- |
| 768670_Cnitroreducens@YP_004051749    | -KIKNRVKS-   | ----       | ---- | ---- |
| 717231_Fsinusarabici@YP_004603876     | -KIKNKETNC-  | EV         | ---- | ---- |
| 639282_Ddesulfuricans@YP_003496772    | -KIKTEIAS-   | ----       | ---- | ---- |
| 522772_Dacetiphilus@YP_003503972      | -KVKKDN-     | ----       | ---- | ---- |
| 693746_Ovalericigenes@YP_004880314    | -DCEHCAGE-   | ----       | ---- | ---- |
| 657321_Rbromii@YP_007781362           | -ECDSCGCEG-  | ----       | ---- | ---- |
| 657322_Fprausnitzii@YP_007799942      | -EDCEHCESC-  | GN         | ---- | ---- |
| 213810_Rchampanellensi@YP_007828576   | -ECGCGCEG-   | ----       | ---- | ---- |
| 657319_[siraeum@YP_007775950          | -DDHCDSCCG-  | I          | ---- | ---- |
| 293826_Ametalliredigen@YP_001320267   | -NDDHDDHDD-  | IEEE       | ---- | ---- |
| 350688_Aoremlandii@YP_001513205       | -DEDHDDHDE-  | EEEE       | ---- | ---- |
| 546269_Falocis@YP_005054244           | -EDHEHDHE-   | ----       | ---- | ---- |
| 1511_[sticklandii@YP_003936518        | -DDDHDHDD-   | IEED       | ---- | ---- |
| 699034_Pdifficile@YP_006198328        | -DDAHDDVE-   | EEE        | ---- | ---- |
| 1128398_[acidurici@YP_006788189       | -DDEDLHAH-   | GHDEE      | ---- | ---- |
| 572544_Ipolytropus@YP_003967871       | ----         | ----       | ---- | ---- |
| 469604_Fnucleatum@YP_008477745        | ----         | ----       | ---- | ---- |
| 580340_Tlienii@YP_004932350           | ----         | ----       | ---- | ---- |
| 891968_Amobile@YP_006444325           | -CAKA-       | ----       | ---- | ---- |
| 525903_Tacidaminovorana@YP_003316727  | -FSHHEDEEG-  | MESRAAD    | ---- | ---- |
| 697281_Maustraliensis@YP_004463371    | -EHIHDCADD-  | EAANG      | ---- | ---- |
| 309799_Dthermophilum@YP_002251521     | ----         | ----       | ---- | ---- |
| 368407_Mmarisnigri@YP_001047821       | -CSGEGGCDS-  | CPGND      | ---- | ---- |
| 903814_Elimosum@YP_003961665          | ----         | ----       | ---- | ---- |
| 931626_Awoodii@YP_005268656           | ----         | ----       | ---- | ---- |
| 410358_Mlabreanum@YP_001029708        | -CCHDCDTCE-  | L          | ---- | ---- |
| 679926_Mpetrolearius@YP_003895855     | -EHHH-       | ----       | ---- | ---- |
| 86416_Cpasteurianum@YP_007940944      | -AIHEHVHGN-  | ----       | ---- | ---- |
| 929506_Cbotulinum@YP_004396224        | -HIHDEVHGX-  | ----       | ---- | ---- |
| 386415_Cnovyi@YP_878355               | -HIHDEVHGX-  | ----       | ---- | ---- |
| 748727_Cljungdahlii@YP_003779382      | -TIHEHVHGN-  | ----       | ---- | ---- |
| 1341692_Ccautoethanogenu@YP_008700753 | -TIHEHVHGN-  | ----       | ---- | ---- |
| 747365_Tnarugense@YP_004437867        | -VIEKHQCNN-  | ----       | ---- | ---- |
| 651822_Ffastidiosum@YP_007827223      | ----         | ----       | ---- | ---- |
| 572547_Acolombiense@YP_003553035      | -LVDEHSHHF-  | HHQG       | ---- | ---- |
| 212717_Ctetani@NP_781697              | -HIHDEVHGC-  | ----       | ---- | ---- |
| 431943_Ckluveri@YP_001394709          | -TIHEHVHGO-  | ----       | ---- | ---- |
| 573061_Ccellulovorans@YP_003843335    | -HIHEEVHGH-  | ----       | ---- | ---- |
| 508767_Cbotulinum@YP_001920515        | -DELHNMVHGE- | E          | ---- | ---- |
| 931276_Csaccharoperbut@YP_007454264   | -EDLHAAVHGE- | E          | ---- | ---- |
| 290402_Cbeijerinckii@YP_001308237     | -EDLHAAVHGE- | E          | ---- | ---- |
| 1345695_Csaccharobutyli@YP_008674363  | -DLHDMVHGE-  | ----       | ---- | ---- |
| 269797_Mbarkeri@YP_305925             | ----         | ----       | ---- | ---- |
| 188937_Macetivorans@NP_617616         | ----         | ----       | ---- | ---- |
| 195103_Cperfringens@YP_696469         | -DIHEHVHC-   | ----       | ---- | ---- |
| 593750_Mformicica@YP_007249963        | -HEHEDVTCE-  | H          | ---- | ---- |
| 456442_Mboonei@YP_001405283           | -HEHEEGIEC-  | OH         | ---- | ---- |
| 521011_Mpalustris@YP_002466865        | -HEADACDIP-  | PSE        | ---- | ---- |
| 323259_Mhungatei@YP_503638            | -HSHDDLACE-  | E          | ---- | ---- |
| 547558_Mmahii@YP_003541558            | ----         | ----       | ---- | ---- |
| 644295_Mvestigatum@YP_003727500       | -PE-         | ----       | ---- | ---- |
| 351627_Csaccharolyticu@YP_001181022   | ----         | ----       | ---- | ---- |
| 521460_Cbescii@YP_002573580           | ----         | ----       | ---- | ---- |
| 632292_Chydrothermalis@YP_003992133   | ----         | ----       | ---- | ---- |
| 632348_Ckronotskyensis@YP_004023692   | ----         | ----       | ---- | ---- |
| 632335_Ckristjanssonii@YP_004026829   | ----         | ----       | ---- | ---- |
| 632516_Clactoaceticus@YP_004798736    | ----         | ----       | ---- | ---- |
| 608506_Cobsidiensis@YP_003840166      | ----         | ----       | ---- | ---- |
| 632518_Cowensensis@YP_004002802       | ----         | ----       | ---- | ---- |
| 1121335_[stercorarium@YP_007372524    | -CCKCETESE-  | DSEE       | ---- | ---- |
| 1121335_[stercorarium@YP_007678972    | -CCKCETESE-  | DSEE       | ---- | ---- |
| 755731_Csp@YP_005148252               | -GECSCCHHS-  | HGREEDFEDE | E    | ---- |
| 394503_Ccellulolyticum@YP_002506259   | -GECSCCHHS-  | HGREENFEDE | E    | ---- |
| 720554_[clariflavum@YP_005046370      | -GRRCDLHH-   | HLDEEDD    | ---- | ---- |
